# Supplementary material for: Polyacrylamide gel as a new embedding medium for the enhancement of metabolite MALDI imaging
Source: Royal Society of Chemistry journal article supplement (doi:10.1039/d2cc07075h), 2023-01-01
Supplement: d2cc07075h1.pdf [file d2cc07075h1.pdf]

## Supplementary Information

### Polyacrylamide gel as a new embedding media for the enhancement of metabolite MALDI imaging

Chenyu Yang,<sup>‡ab</sup> Ran Wu,<sup>‡ab</sup> Haiqiang Liu,<sup>‡ab</sup> Liang Qin,<sup>ab</sup> Lulu Chen,<sup>ab</sup> Liang Qin,<sup>ab</sup> Hualei Xu,<sup>ab</sup> Hao Hu,<sup>ab</sup>  
Jinrong Li,<sup>ab</sup> Hua Guo,<sup>ab</sup> Yiyang Shi,<sup>ab</sup> Dongxu Jiang,<sup>ab</sup> Qichen Hao,<sup>ab</sup> Jinchao Feng,<sup>b</sup> Yijun Zhou,<sup>b</sup> Xiangyi  
Liu,<sup>\*c</sup> Gaopeng Li,<sup>\*d</sup> and Xiaodong Wang<sup>\*ab</sup>

<sup>a</sup> Key Laboratory of Mass Spectrometry Imaging and Metabolomics (Minzu University of China), State Ethnic Affairs Commission, Beijing 100081, China.

<sup>b</sup> Centre for Imaging & Systems Biology, College of Life and Environmental Sciences, Minzu University of China, Beijing 100081, China.

<sup>c</sup> Department of Laboratory Medicine, Beijing Tongren Hospital, Capital Medical University, Beijing 100730, China.

<sup>d</sup> General Surgery Department, Shanxi Bethune Hospital, Taiyuan 030032, China.

<sup>‡</sup>C. Y., R. W., and H. L. contributed equally to this manuscript.

#### **\*Corresponding Authors:**

**Xiaodong Wang** – Key Laboratory of Mass Spectrometry Imaging and Metabolomics (Minzu University of China), State Ethnic Affairs Commission; Centre for Imaging & Systems Biology, College of Life and Environmental Sciences, Minzu University of China

#27 Zhongguancun South Avenue, Beijing 100081, China

**Email:** Xiaodong@muc.edu.cn

**Gaopeng Li** – General Surgery Department, Shanxi Bethune Hospital

#99 Longcheng Street, Taiyuan 030032, China

**Email:** malone2001@163.com

**Xiangyi Liu** – Department of Laboratory Medicine, Beijing Tongren Hospital, Capital Medical University  
#8 Chongwenmen Inner St, Beijing 100730, China.

**Email:** liuxiangyi@ccmu.edu.cn

## Contents

|                                                                                                                                                                                                                                                                                                                                                                                                                                                                                                                                                    |             |
|----------------------------------------------------------------------------------------------------------------------------------------------------------------------------------------------------------------------------------------------------------------------------------------------------------------------------------------------------------------------------------------------------------------------------------------------------------------------------------------------------------------------------------------------------|-------------|
| <b>Supplementary Information--EXPERIMENTAL SECTION</b> .....                                                                                                                                                                                                                                                                                                                                                                                                                                                                                       | <b>S-4</b>  |
| <b>Supplementary Information Figure S1.</b> Comparison of mass spectra of two matrices (2-MBT for positive ion mode, MEK for negative ion mode) with and without PAAG by (+/-)MALDI-TOF MS .....                                                                                                                                                                                                                                                                                                                                                   | <b>S-7</b>  |
| <b>Supplementary Information Figure S2.</b> Comparison of the morphological maintenance effects of five embedding media ( <i>i.e.</i> , OCT, ice, agarose, gelatin, and PAAG) on rat liver tissue sectioning. The section thickness is 10 $\mu\text{m}$ .....                                                                                                                                                                                                                                                                                      | <b>S-8</b>  |
| <b>Supplementary Information Figure S3.</b> Comparison of the minimum thickness of intact tissue sections of Atlantic salmon eyeballs embedded with gelatin, agarose, OCT, and PAAG, respectively. ....                                                                                                                                                                                                                                                                                                                                            | <b>S-9</b>  |
| <b>Supplementary Information Figure S4.</b> Comparison of metabolites detected in rat liver tissues by MALDI-TOF MS in the positive and negative ion modes. Two compounds of 2-MBT and MEK were used as the positive and negative matrices, respectively. The targeted samples of rat liver tissues were embedded with four media, including ice, agarose, gelatin, and PAAG. (A-C) and (D-F) means the mass spectra acquired from three biological replicates .....                                                                               | <b>S-10</b> |
| <b>Supplementary Information Figure S5.</b> Comparison of metabolites detected from Atlantic salmon eyeball tissue sections by (+/-)MALDI-TOF MS using 2-MBT and MEK as the positive and negative matrices, respectively. Before tissue sectioning, the Atlantic salmon eyeballs were embedded with different media, including OCT, agarose, gelatin, and PAAG, respectively, the data showed in (C) and (D) were the average signal intensities statistically calculated from three biological replicates .....                                   | <b>S-11</b> |
| <b>Supplementary Information Figure S6.</b> Comparison of the numbers of metabolite ion signals detected in the serial tissue sections of rat liver without embedding, and embedded with ice, agarose, gelatin, and PAAG, respectively. The data showed in (A) and (B) were the average signal numbers statistically calculated from three biological replicates. ....                                                                                                                                                                             | <b>S-12</b> |
| <b>Supplementary Information Figure S7.</b> (A) and (B) Comparison of metabolites detected from Atlantic salmon eyeball tissue sections <i>via</i> (+/-) MALDI-TOF MS using 2-MBT and MEK as the positive and negative matrices, respectively. Before tissue sectioning, the eyeballs were embedded with different media, including OCT, agarose, gelatin, and PAAG, respectively. (C) and (D) Data derived from (A) and (B), respectively, showing the average signal intensities statistically calculated from three biological replicates ..... | <b>S-13</b> |
| <b>Supplementary Information Figure S8.</b> Comparison of the number of metabolite ion signals detected in the serial tissue sections of Atlantic salmon eyeballs embedded with OCT, agarose, gelatin, and PAAG, respectively. The data showed in (A) and (B) were the average signal numbers statistically calculated from three biological replicates. ....                                                                                                                                                                                      | <b>S-14</b> |
| <b>Supplementary Information Figure S9.</b> The heat map of the ion signal intensities of metabolites                                                                                                                                                                                                                                                                                                                                                                                                                                              |             |

detected in serial tissue sections of Atlantic salmon eyeballs embedded with OCT, agarose, gelatin, and PAAG media, respectively, by (+)MALDI-TOF MS using 2-MBT as the matrix (n=3×3).....**S-15**

**Supplementary Information Figure S10.** The heat map of the ion signal intensities of metabolites detected in serial tissue sections of Atlantic salmon eyeballs embedded with OCT, agarose, gelatin, and PAAG media, respectively, by (-)MALDI-TOF MS using MEK as the matrix (n=3×3).....**S-16**

**Supplementary Information Table S1.** Properties of PAAG embedding for MALDI-MSI, compared with four kinds of commonly-used media. ....**S-17**

**Supplementary Information Table S2.** Comparison of metabolite ion signals detected in the tissue sections of rat liver embedded with or without ice, agarose, gelatin, and PAAG, by (+)MALDI-TOF/TOF MS using 2-MBT as the matrix (n=3×3). ....**S-18**

**Supplementary Information Table S3.** Comparison of metabolite ion signals detected in the tissue sections of rat livers embedded with or without ice, agarose, gelatin, and PAAG, by (-)MALDI-TOF/TOF MS using MEK as the matrix (n=3×3). ....**S-23**

**Supplementary Information Table S4.** Comparison of metabolite ion signals detected in the tissue sections of Atlantic salmon eyeballs embedded with OCT, agarose, gelatin, and PAAG, respectively, by (+)MALDI-TOF/TOF MS using 2-MBT as the matrix (n=3×3). ....**S-30**

**Supplementary Information Table S5.** Comparison of metabolite ion signals detected in the tissue sections of Atlantic salmon eyeballs embedded with OCT, agarose, gelatin, and PAAG, respectively, by (-)MALDI-TOF/TOF MS using MEK as the matrix (n=3×3). ....**S-38**

**Supplementary Information Table S6.** Metabolites detected and assigned in PAAG embedded Atlantic salmon eyeball tissue sections by (+)MALDI-TOF/TOF MS using 2-MBT as the matrix. **S-48**

**Supplementary Information Table S7.** Metabolites detected and assigned in PAAG embedded Atlantic salmon eyeball tissue sections by (-)MALDI-TOF/TOF MS using MEK as the matrix. ...**S-56**

**Reference**..... **S-66**

### Author Contribution Statement

X. W., X. L., and G. L. conceived the ideas; C. Y., R. W., H. L., and Q. H. carried out the MALDI-MSI experiments; C. Y., R. W., and H. L. performed the MS data analysis with the help of L. Q., L. C., H. X., H. H., and J. L.; C. Y., R. W., and H. L. wrote the initial manuscript with help of H. G., Y. S., D. J., and Q. H.; J F., Y. Z., G. L., X. L., and X. W. participated in the scientific discussion and manuscript revision; X. W., X. L., and G. L. supervised the work of C. Y., R. W., H. L., L. Q., L. C., H. X., H. H., J. L., H. G., Y. S., D. J., and Q. H..

## Supplementary Information--EXPERIMENTAL SECTION

**Reagents and Materials.** Acrylamide (AM) and bis-acrylamide (BIS) were purchased from Amersco Inc. (OH, USA). Gelatin and agarose were purchased from Sigma-Aldrich (St. Louis, MO, USA). OCT compound was purchased from Leica Biosystems (Nussloch, Germany). Two matrices of 2-Mercaptobenzothiazole (2-MBT) and Michler's ethylketone (MEK, 4,4'-bis(diethylamino)benzophenone) were purchased from Sigma-Aldrich (St. Louis, MO, USA). Ultrapure water was obtained from a Milli-Q system (Millipore USA). All other chemicals (reagent grade or suitable chemical purity) not mentioned were obtained from Merck (Darmstadt, Germany). The rat livers were obtained from 8-week-old adult male Sprague–Dawley rats (Shanghai Super-B&K Laboratory Animal Corp. Ltd., Shanghai, China). The eyeballs were obtained from Atlantic salmon (*Salmo salar*) (Sidaokou aquatic product wholesale market, Beijing, China). All tissue samples were flash-frozen by slowly immersing them in liquid nitrogen to avoid shattering. The use of animal organs for this study was approved by the Ethics Committee of the College of Life and Environmental Sciences, Minzu University of China.

**Optimization of PAAG Solution Composition.** The concentration of PAAG was prepared at 2%, 4%, 8%, and 12% (AM:BIS = 20:1). Rat livers were embedded in PAAG with different concentrations and then sectioned for the maintenance effect evaluation of PAAG.

**Embedding Media Preparation.** Four embedding media were prepared in this study, including 4% PAAG, 10% gelatin, 1% agarose, and OCT. For PAAG embedding media preparation, the 500-mL 4% PAAG (AM:BIS=20:1) stock solution was prepared as follows: 19.05 g AM and 0.95 g BIS were dissolved in ultrapure water and diluted to 500 mL at room temperature, then the stock solution should be transferred to a brown bottle for dark storage at 4 °C. The whole preparation process does not require heating. N,N,N',N'-tetramethyl ethylenediamine and ammonium persulfate were added into the PAAG solution with the final concentrations of 0.0001% and 0.2%, respectively, before being used as an embedding medium. Gelatin and agarose were prepared by pouring the solids into a 50-mL beaker and adding ultrapure water. The beakers were then heated in a standard microwave oven without boiling over, with stirring, until the solids were completely dissolved, agarose need to be cooled to about 40 °C and gelatin to about 30 °C before being used as embedding media.

**Sample Preparation.** Suitable containers were prepared and filled with the media at the bottom before tissues were added. The tissues were placed on the surfaces of the solidified media, and the solution was poured into the container along the wall. After the media solidified, flash-frozen was carried out. The temperatures of agarose and gelatin were strictly controlled during the entire process.

**Tissue Sectioning and Matrix Coating.** According to previous studies, all the samples were sectioned at the chamber temperature of -20 °C.<sup>1,2</sup> All the selected fresh frozen tissue samples were sectioned into 12  $\mu\text{m}$  (rat liver) and 20  $\mu\text{m}$  (Atlantic salmon eyeballs) thickness slices in a Leica CM1860 cryostat (Leica Microsystems Inc., Wetzlar, Germany) After sectioning, all these tissue slices were immediately thaw-mounted on the indium tin oxide (ITO)-coated microscope glass slides purchased from Bruker Daltonics (Bremen, Germany). These tissue sections were coated with 2-MBT and MEK, respectively, by a GET-Sprayer (I) (HIT Co., Ltd, Beijing, China). 2-MBT was prepared at a concentration of 12 mg/mL in a mixed MeOH: water: formic acid (FA) (80: 20: 0.2, v/v/v) solution. MEK was prepared at a concentration of 12 mg/mL in 90:10 MeOH/water containing 1%  $\text{NH}_3\cdot\text{H}_2\text{O}$ . The matrix solutions were sprayed ten cycles (5 s spray, and 45 s drying time) on the surfaces of the

rat liver and Atlantic salmon eyeball tissue sections to pre-seed a thin layer of matrix. After air-drying in a vented fume hood, the matrix solutions were evenly sprayed with fifty more cycles on the same tissue sections.

**MALDI-MS.** All the MS analysis was performed on an Autoflex Speed MALDI time-of-flight (TOF)/TOF mass spectrometer (Bruker Daltonics, Billerica, MA, USA) equipped with a solid-state Smartbeam Nd: YAG UV laser (355 nm, Azura Laser AG). The laser impulse energy was approximately 180 mJ, and the laser repetition rate was 2000 Hz. For metabolites *in situ* detection and imaging, mass spectra were acquired over the mass range from 100 to 2000 Da in the positive ion mode and negative ion mode. Two matrices of 2-MBT and MEK were used for the *in-situ* detection and imaging of metabolites from rat livers and Atlantic salmon eyeballs. To obtain MALDI-MS profiling data, mass spectra were recorded from an accumulation of 50 laser scans, each scan was in different regions and accumulated from 500 laser shots for both positive and negative ion modes. For MALDI-MSI, 250  $\mu\text{m}$  laser grating step sizes were used to *in-situ* detect metabolites in Atlantic salmon eyeball tissue sections, and each scan (pixel) was accumulated from 500 laser shots.

**Compounds extraction and LC-MS/MS.** Lipid extraction were conducted according to a previous work<sup>3</sup>. Briefly, 20 mg eyeball tissue was homogenized in 200  $\mu\text{L}$  of water with the aid of two 5-mm stainless steel balls for 30 s x 2 at a vibration frequency of 30 Hz by Retsch MM400 mixer (Retsch GmbH, Haan, Germany). Then, 800  $\mu\text{L}$  of a mixed chloroform-methanol (1:3, v/v) solvent was added, followed by another 30-s homogenization step. After homogenization, the tube was centrifuged at 4,000 x g and 4°C for 20 minutes (Beckman Coulter Allegra X-22R centrifuge Brea, CA). The supernatants were collected and mixed with 250  $\mu\text{L}$  of chloroform and 100  $\mu\text{L}$  of water. After vortex mixing and centrifugation at 10,600 x g for 5 min, the lower organic phase in each tube was carefully transferred to a new tube and then dried in a Savant SPD1010 speed-vacuum concentrator (Thermo Electron Corporation, Waltham, MA) and stored at -80°C until used.

Expect for lipids, other metabolites were extracted as described by Nam *et al.*<sup>4</sup>. One mL of methanol/water (8:2, v/v) was added to 100 mg of eyeball tissue (liquid nitrogen grinding). The mixture was extracted in an ice water bath for 15 min and centrifuged at 20,000 x g for 10 min at 4°C. Take the supernatant and stored at -80°C until used.

Structural confirmation of the most detected mass-matched compounds was conducted using a Waters ACQUITY UPLC system coupled to a Waters Synapt HDMS quadrupole-time-of-flight (Q-TOF) mass spectrometer (Beverly, MA). The dried extract residues were dissolved in 100  $\mu\text{L}$  of chloroform and 8  $\mu\text{L}$  were injected onto a Waters Atlantis® Atlantis C<sup>18</sup> reverse phase column (150 mm x 4.6 mm, 5  $\mu\text{m}$ ) for different compounds separations. LC/MS data were collected in both positive and negative ESI modes, with respective injections. MS/MS experiments were conducted using collision-induced dissociation (CID) at 10, 20, and 40V collision energies. Waters. *MassLynx software* (version 4.1) suite were used to process UPLC-MS data.

**Data Analysis.** For MS profiling data analysis, the Bruker *FlexAnalysis 3.4* software was used for the preliminary mass spectral viewing and processing, The peak lists generation were derived by setting the signal-to-noise(S/N) ratio of 3. The processed MS data were uploaded to *MetaboAnalyst* for further statistical analysis, after removing matrix peak interference. The ion maps were reconstructed by *FlexImaging 4.1* software (Bruker). With the aid of three databases, LIPID MAPS (<https://www.lipidmaps.org/>), HMDB (<https://hmdb.ca/>), and METLIN (<http://metlin.scripps.edu>), metabolite matching were indicated on the ion signal peak lists within the allowable

mass error range of  $\pm 10$  ppm. Three ion adduct forms of  $[M+H]^+$ ,  $[M+Na]^+$ , and  $[M+K]^+$  for positive ion mode, and one ion adduct form of  $[M-H]^-$  for negative ion mode, were taken into consideration for the metabolite identification.

**Hematoxylin and Eosin (H&E) Staining.** H&E staining was performed according to a previous study to obtain standard histological optical images<sup>5</sup>.

## Supplementary Information—FIGURES

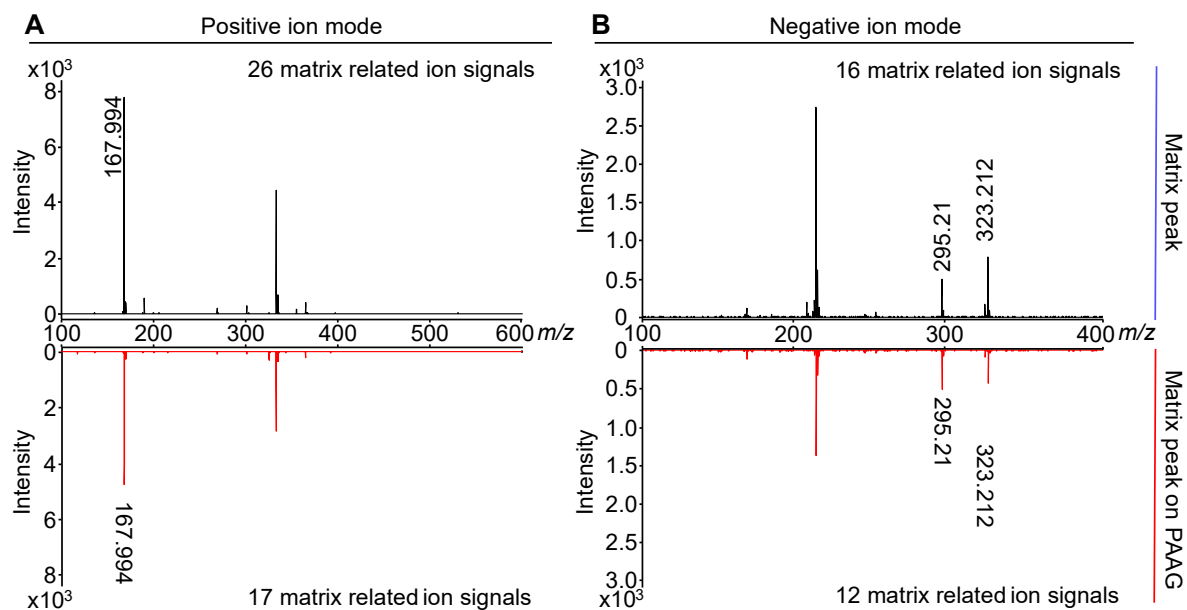

**Fig. S1** Comparison of mass spectra of two matrices (2-MBT for positive ion mode, MEK for negative ion mode) with and without PAAG by (+/-)MALDI-TOF MS.

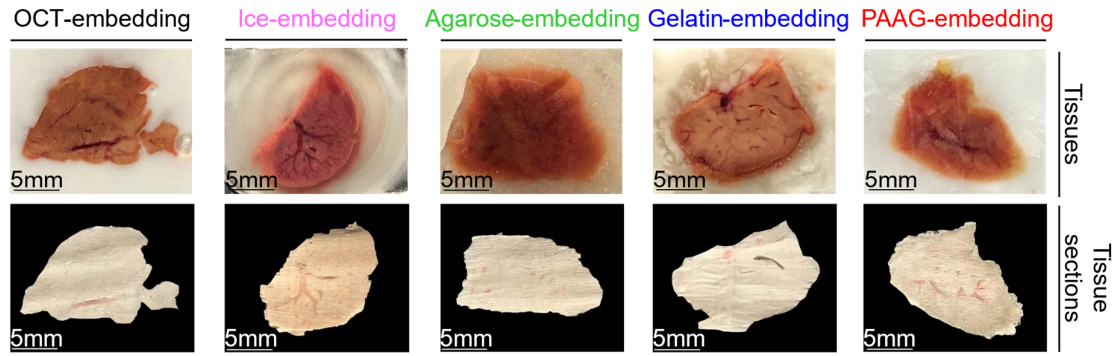

**Fig. S2** Comparison of the morphological maintenance effects of five embedding media (*i.e.*, OCT, ice, agarose, gelatin, and PAAG) on rat liver tissue sectioning. The section thickness is 10  $\mu\text{m}$ .



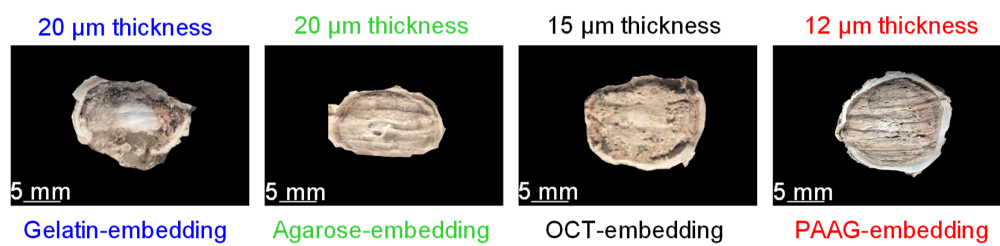

**Fig. S3** Comparison of the minimum thickness of intact tissue sections of Atlantic salmon eyeballs embedded with gelatin, agarose, OCT, and PAAG, respectively.

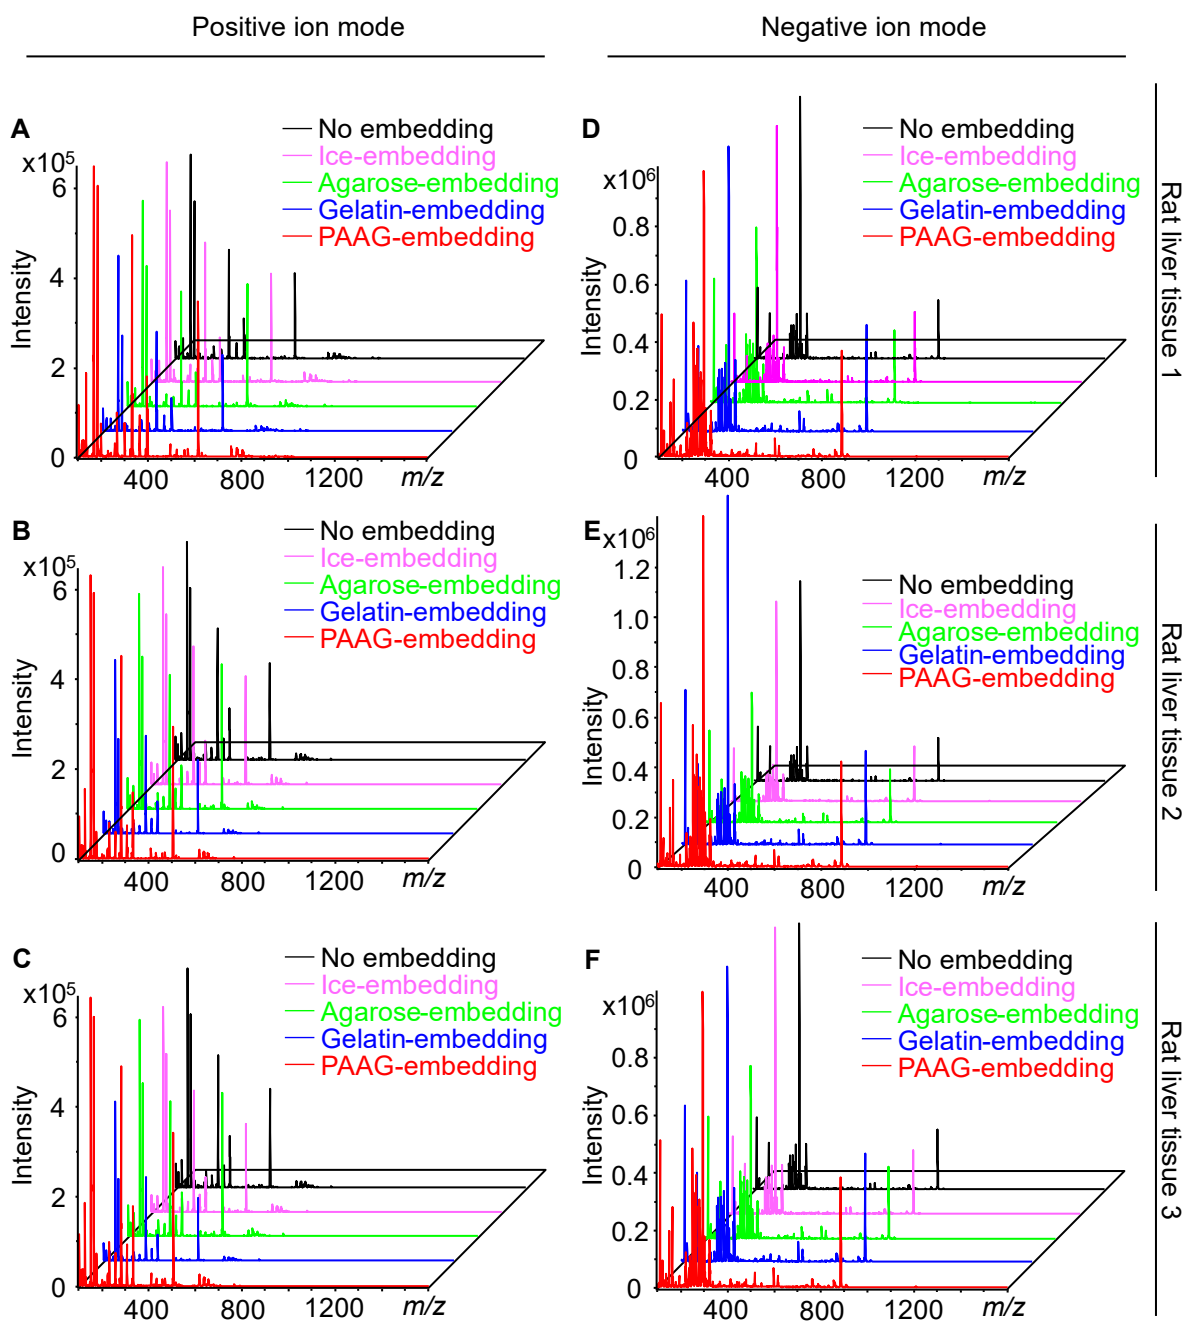

**Fig. S4** Comparison of metabolites detected in rat liver tissues by MALDI-TOF MS in the positive and negative ion modes. Two compounds of 2-MBT and MEK were used as the positive and negative matrices, respectively. The targeted samples of rat liver tissues were embedded with four media, including ice, agarose, gelatin, and PAAG. (A-C) and (D-F) means the mass spectra acquired from three biological replicates.

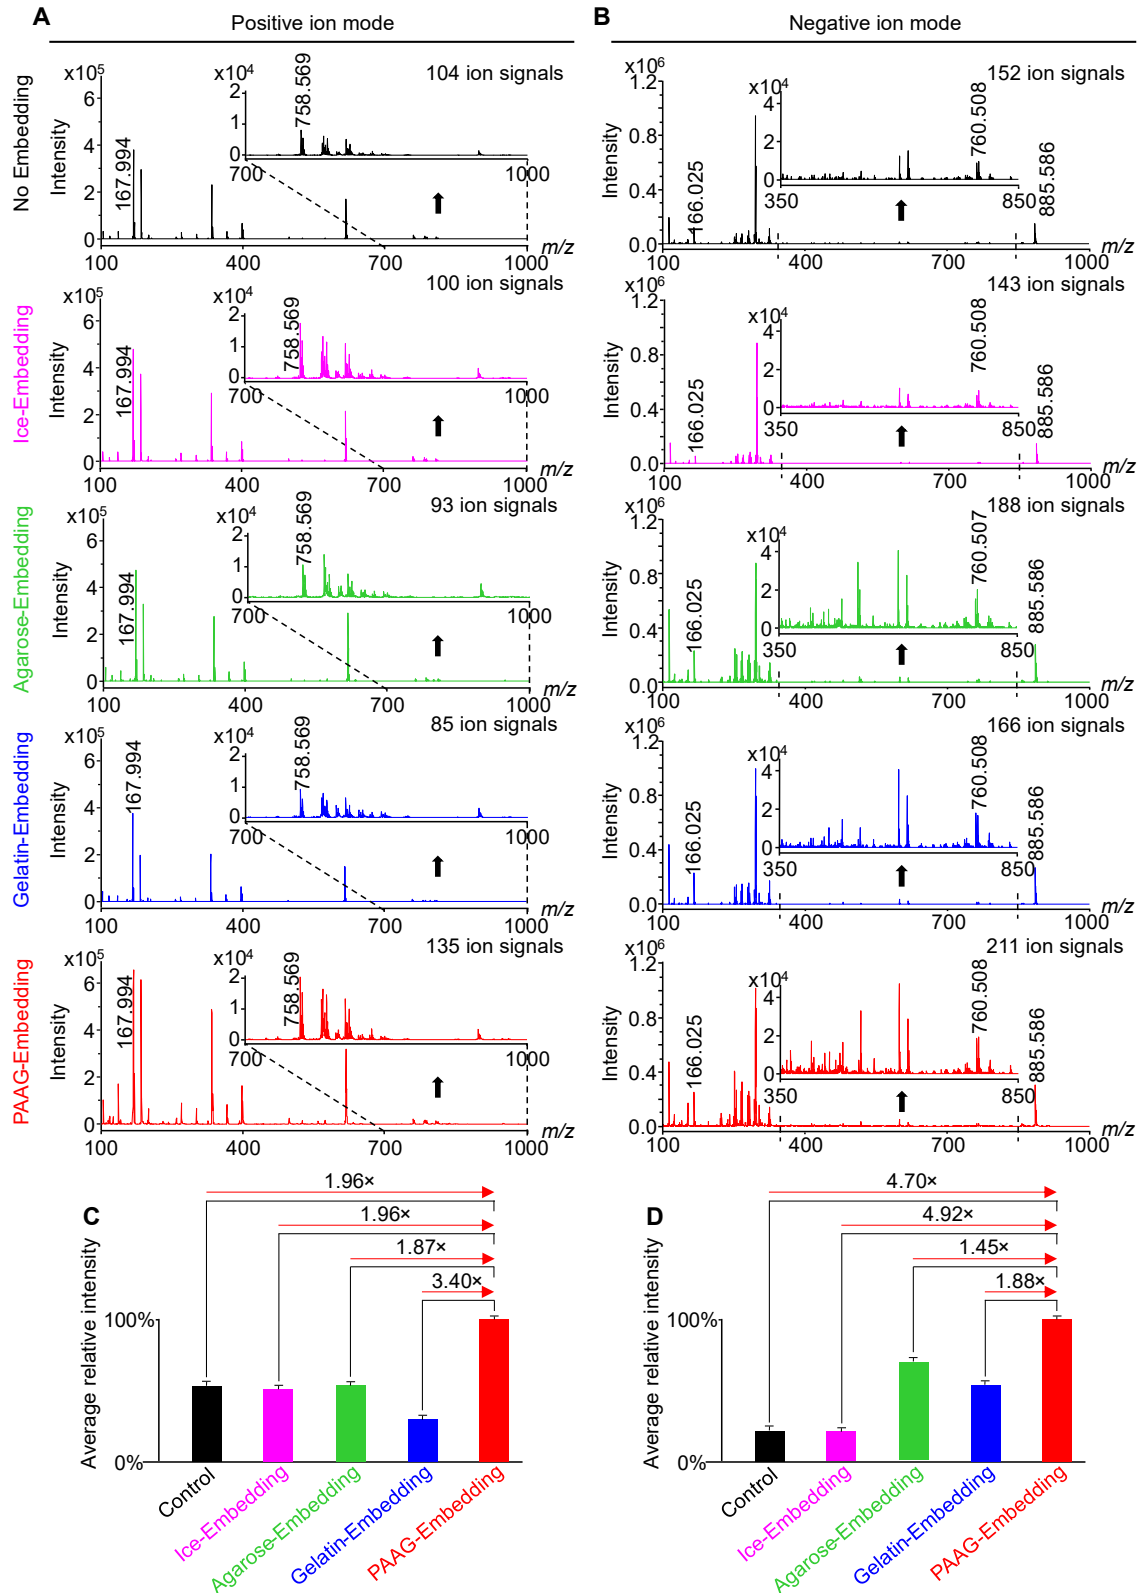

**Fig. S5** Comparison of metabolites detected from rat liver tissue sections by (+/-)MALDI-TOF MS using 2-MBT and MEK as the positive and negative matrices, respectively. Before tissue sectioning, the rat liver tissues were embedded with different media, including ice, agarose, gelatin, and PAAG. One rat liver tissue without embedded medium was used as the control, the data showed in (C) and (D) were the average signal intensities statistically calculated from three biological replicates.

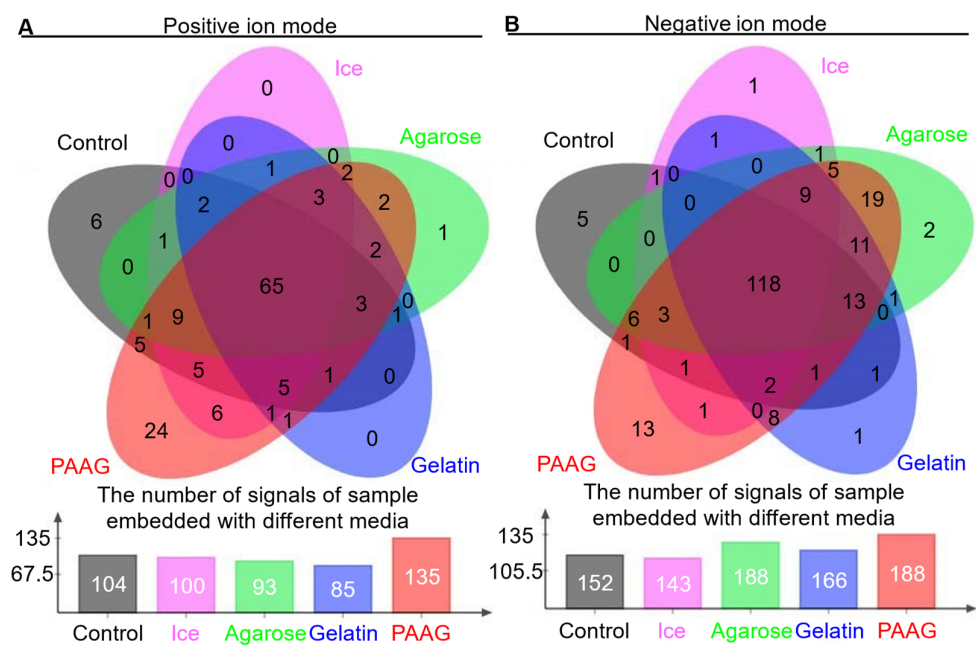

**Fig. S6** Comparison of the numbers of metabolite ion signals detected in the serial tissue sections of rat liver without embedding, and embedded with ice, agarose, gelatin, and PAAG, respectively. The data showed in (A) and (B) were the average signal numbers statistically calculated from three biological replicates.

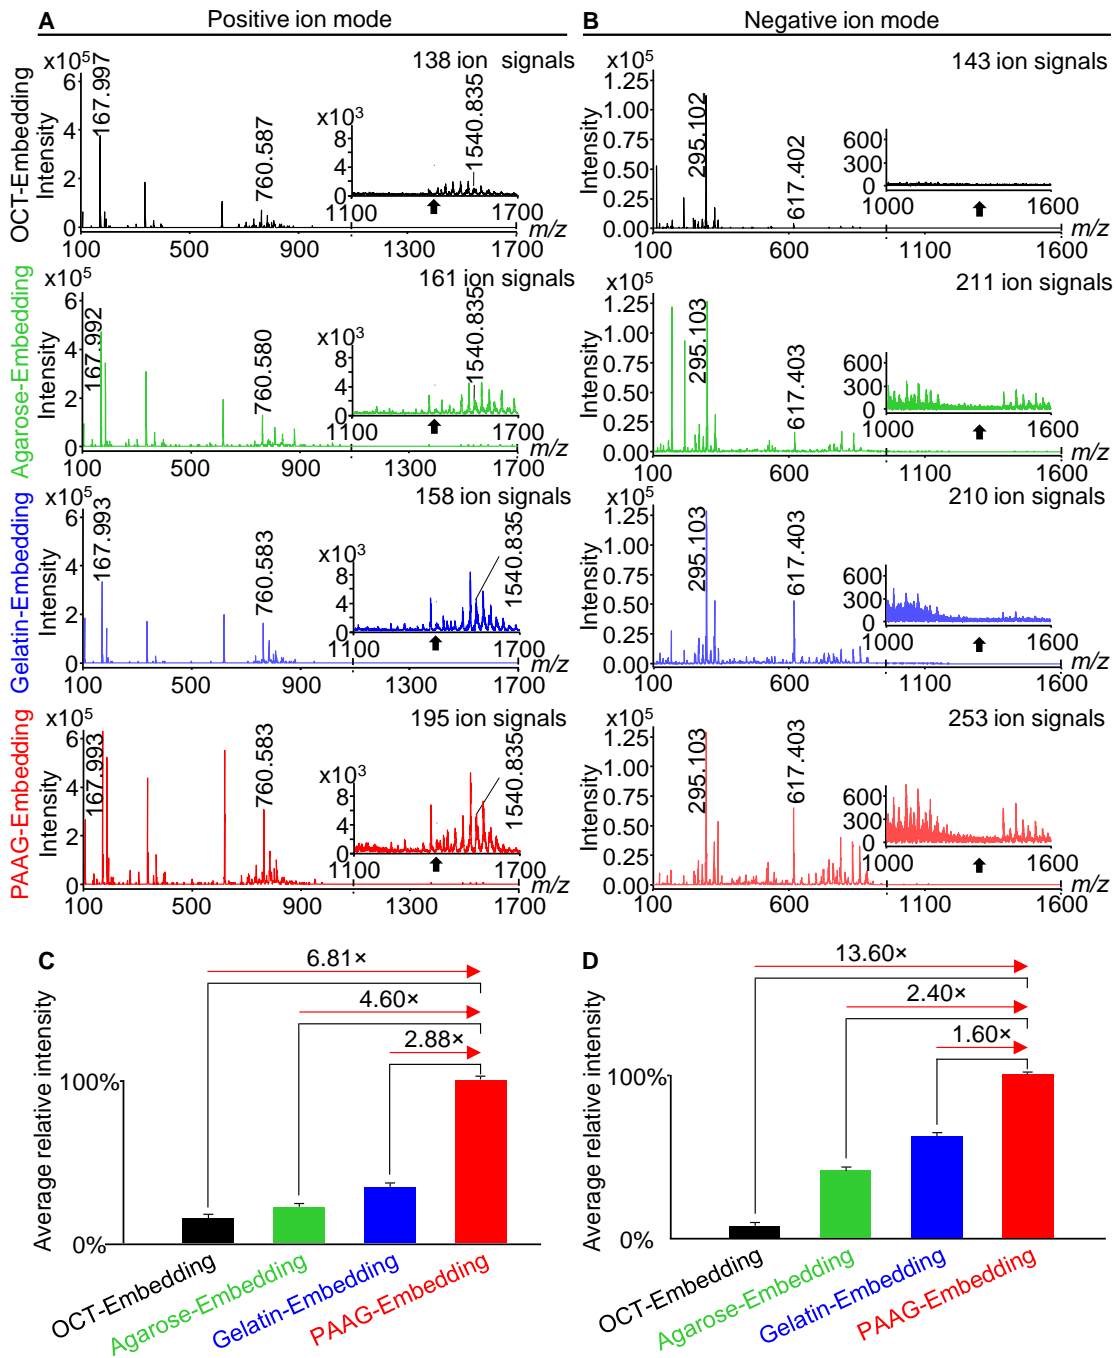

**Fig. S7** (A) and (B) Comparison of metabolites detected from Atlantic salmon eyeball tissue sections *via* (+/-) MALDI-TOF MS using 2-MBT and MEK as the positive and negative matrices, respectively. Before tissue sectioning, the eyeballs were embedded with different media, including OCT, agarose, gelatin, and PAAG, respectively. (C) and (D) Data derived from (A) and (B), respectively, showing the average signal intensities statistically calculated from three biological replicates.

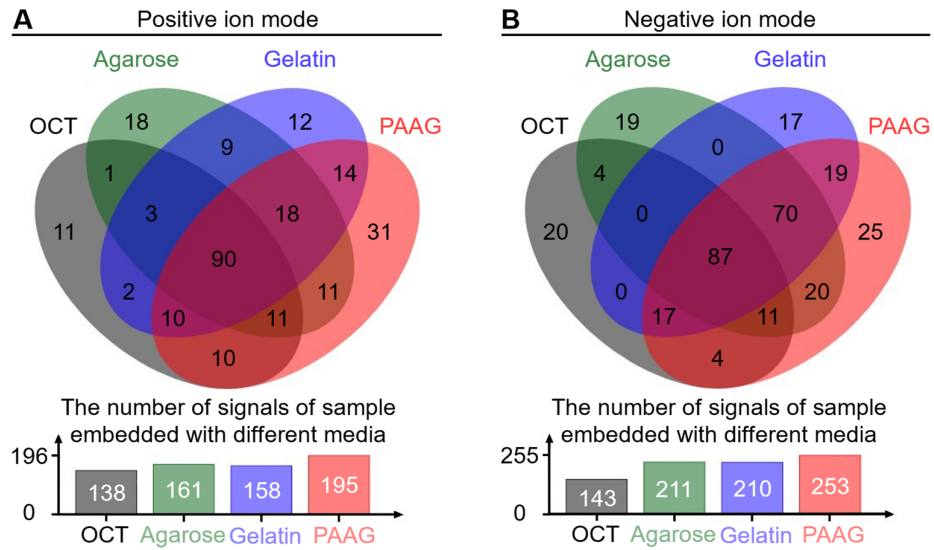

**Fig. S8** Comparison of the numbers of metabolite ion signals detected in the serial tissue sections of Atlantic salmon eyeballs embedded with OCT, agarose, gelatin, and PAAG, respectively. The data showed in (A) and (B) were the average signal numbers statistically calculated from three biological replicates.

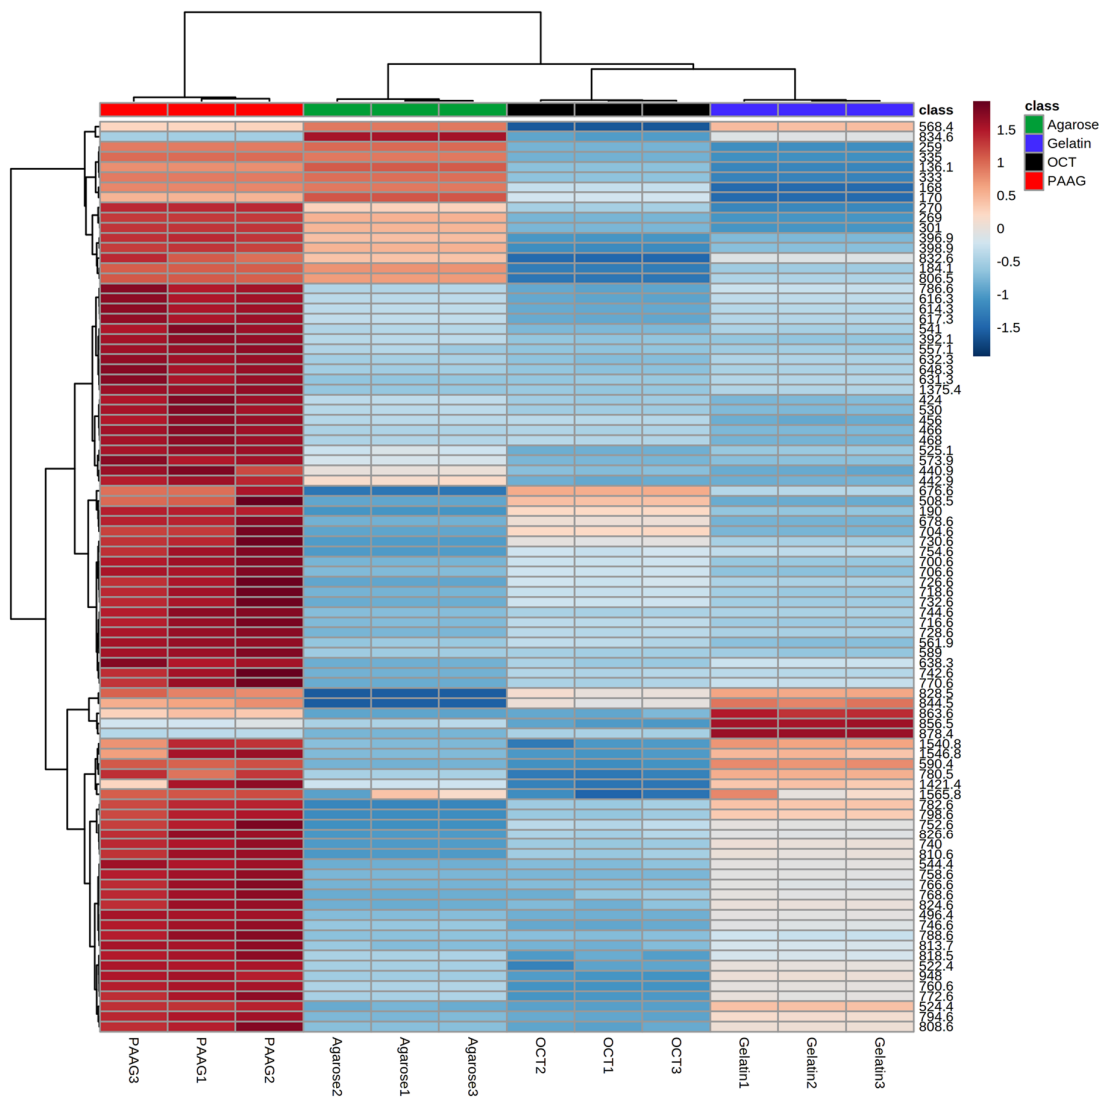

**Fig. S9** The heat map of the ion signal intensities of metabolites detected in serial tissue sections of Atlantic salmon eyeballs embedded with OCT, agarose, gelatin, and PAAG media, respectively, by (+)MALDI-TOF MS using 2-MBT as the matrix (n=3×3).

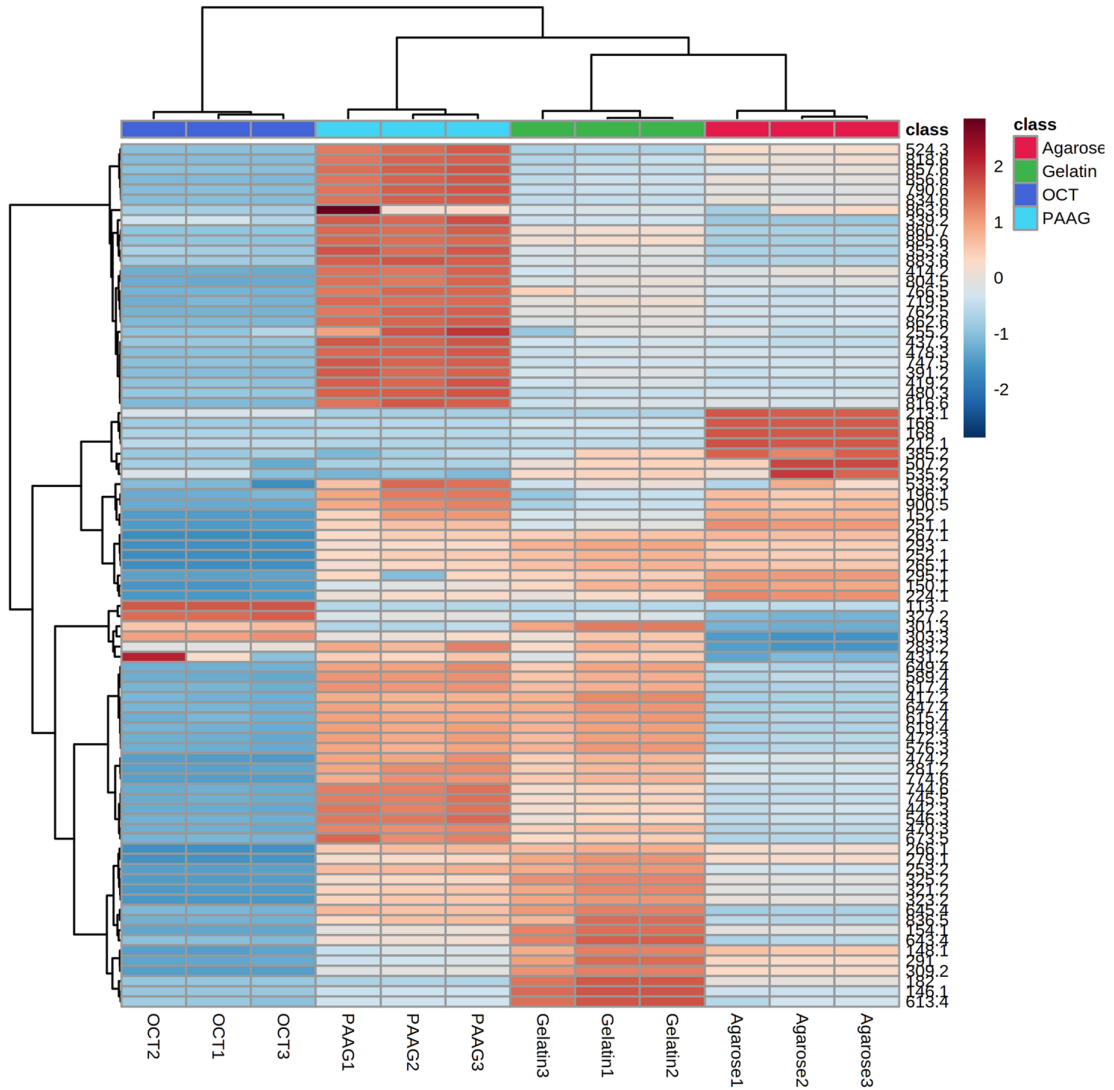

**Fig. S10** The heat map of the ion signal intensities of metabolites detected in serial tissue sections of Atlantic salmon eyeballs embedded with OCT, agarose, gelatin, and PAAG media, respectively, by (-)MALDI-TOF MS using MEK as the matrix (n=3×3).



## Supplementary Information--Tables

**Table S1.** Properties of PAAG embedding for MALDI-MSI, compared with four kinds of commonly-used media.

| Embedding medium                 | Preparation      | Physical support features | Adhesivity | Limitations                                                                    | Acceptability |
|----------------------------------|------------------|---------------------------|------------|--------------------------------------------------------------------------------|---------------|
| Ice<br>(Pure ddH <sub>2</sub> O) | Ready to use     | Hard                      | Poor       | Not evaluated                                                                  | Poor          |
| OCT                              | Ready to use     | Pliable                   | Good       | PEG/PVA introduce polymer peaks into spectra, smearing causing ion suppression | Poor          |
| 1% Agarose                       | Fast preparation | Hard                      | Poor       | May cause molecular degradation during heated embedding process                | Acceptable    |
| 10% Gelatin                      | Fast preparation | Hard                      | Poor       | May cause molecular degradation during heated embedding process                | Acceptable    |
| PAAG                             | Ready to use     | Pliable                   | Good       | Not observed                                                                   | Good          |

**Table S2.** Comparison of metabolite ion signals detected in the tissue sections of rat liver embedded with or without ice, agarose, gelatin, and PAAG, by (+)MALDI-TOF/TOF MS using 2-MBT as the matrix (n=3×3).

| Detected<br>metabolite ion<br>signals <sup>a)</sup><br>( <i>m/z</i> ) | Rat liver tissue sections |               |                   |                   |                |
|-----------------------------------------------------------------------|---------------------------|---------------|-------------------|-------------------|----------------|
|                                                                       | Control (No<br>embedding) | Ice-embedding | Agarose-embedding | Gelatin-embedding | PAAG-embedding |
| 104.277                                                               | √                         | √             | √                 | √                 | √              |
| 109.132                                                               |                           |               |                   |                   | √              |
| 110.200                                                               |                           |               |                   |                   | √              |
| 112.206                                                               |                           |               |                   |                   | √              |
| 114.409                                                               | √                         | √             | √                 | √                 | √              |
| 115.254                                                               |                           |               |                   |                   | √              |
| 117.267                                                               |                           |               |                   |                   | √              |
| 118.202                                                               | √                         | √             | √                 | √                 | √              |
| 120.168                                                               |                           |               |                   |                   | √              |
| 124.091                                                               |                           |               |                   |                   | √              |
| 125.069                                                               | √                         | √             | √                 |                   | √              |
| 133.199                                                               |                           |               |                   |                   | √              |
| 136.063                                                               | √                         | √             | √                 | √                 | √              |
| 138.053                                                               |                           |               |                   |                   | √              |
| 140.876                                                               | √                         | √             | √                 | √                 | √              |
| 146.143                                                               |                           | √             | √                 | √                 |                |
| 147.002                                                               | √                         |               |                   |                   | √              |
| 156.065                                                               | √                         | √             | √                 | √                 | √              |
| 162.109                                                               | √                         | √             | √                 | √                 | √              |
| 162.962                                                               | √                         |               |                   |                   | √              |
| 166.028                                                               | √                         | √             | √                 | √                 | √              |
| 166.943                                                               | √                         | √             | √                 | √                 | √              |
| 167.995                                                               | √                         | √             | √                 | √                 | √              |
| 168.997                                                               | √                         | √             | √                 |                   | √              |
| 170.000                                                               | √                         | √             | √                 | √                 | √              |
| 170.597                                                               |                           | √             |                   |                   | √              |
| 181.980                                                               |                           |               |                   |                   | √              |
| 184.056                                                               | √                         | √             | √                 | √                 | √              |
| 189.962                                                               | √                         | √             | √                 | √                 | √              |
| 193.989                                                               | √                         |               |                   |                   | √              |
| 198.062                                                               | √                         | √             | √                 |                   | √              |

| Detected<br>metabolite ion<br>signals <sup>a)</sup><br>( <i>m/z</i> ) | Rat liver tissue sections |               |                   |                   |                |
|-----------------------------------------------------------------------|---------------------------|---------------|-------------------|-------------------|----------------|
|                                                                       | Control (No<br>embedding) | Ice-embedding | Agarose-embedding | Gelatin-embedding | PAAG-embedding |
| 198.925                                                               |                           |               |                   |                   | √              |
| 199.943                                                               |                           | √             | √                 |                   | √              |
| 201.937                                                               |                           | √             | √                 | √                 | √              |
| 205.952                                                               | √                         | √             | √                 | √                 | √              |
| 222.005                                                               | √                         | √             | √                 | √                 | √              |
| 224.051                                                               |                           |               |                   |                   | √              |
| 224.995                                                               |                           |               |                   |                   | √              |
| 227.019                                                               |                           |               |                   |                   | √              |
| 229.869                                                               | √                         |               | √                 |                   | √              |
| 231.874                                                               |                           |               |                   |                   | √              |
| 241.964                                                               |                           |               |                   |                   | √              |
| 243.966                                                               | √                         |               | √                 | √                 | √              |
| 256.982                                                               |                           |               |                   |                   | √              |
| 258.086                                                               | √                         | √             | √                 | √                 | √              |
| 259.013                                                               | √                         | √             | √                 | √                 | √              |
| 268.997                                                               | √                         | √             | √                 | √                 | √              |
| 270.006                                                               | √                         | √             | √                 | √                 | √              |
| 271.002                                                               | √                         |               |                   |                   |                |
| 273.921                                                               |                           |               |                   |                   | √              |
| 275.957                                                               | √                         |               |                   |                   | √              |
| 290.988                                                               | √                         | √             | √                 | √                 | √              |
| 296.055                                                               | √                         | √             | √                 | √                 |                |
| 300.979                                                               | √                         | √             | √                 | √                 | √              |
| 302.986                                                               | √                         | √             | √                 | √                 | √              |
| 325.214                                                               | √                         | √             | √                 | √                 | √              |
| 332.963                                                               | √                         | √             | √                 | √                 | √              |
| 334.982                                                               | √                         | √             | √                 | √                 | √              |
| 336.968                                                               | √                         | √             |                   |                   | √              |
| 364.948                                                               | √                         | √             | √                 | √                 | √              |
| 366.944                                                               | √                         | √             | √                 | √                 | √              |
| 390.027                                                               | √                         | √             |                   |                   | √              |
| 392.047                                                               | √                         | √             | √                 | √                 | √              |
| 396.923                                                               | √                         | √             | √                 | √                 | √              |

| Detected<br>metabolite ion<br>signals <sup>a)</sup><br>( <i>m/z</i> ) | Rat liver tissue sections |               |                   |                   |                |
|-----------------------------------------------------------------------|---------------------------|---------------|-------------------|-------------------|----------------|
|                                                                       | Control (No<br>embedding) | Ice-embedding | Agarose-embedding | Gelatin-embedding | PAAG-embedding |
| 398.931                                                               | √                         | √             | √                 | √                 | √              |
| 400.927                                                               | √                         | √             | √                 | √                 | √              |
| 424.023                                                               |                           |               |                   |                   | √              |
| 440.892                                                               | √                         | √             | √                 |                   | √              |
| 442.893                                                               | √                         | √             | √                 |                   | √              |
| 465.977                                                               |                           | √             |                   |                   | √              |
| 478.348                                                               |                           |               |                   |                   | √              |
| 496.378                                                               | √                         | √             | √                 | √                 | √              |
| 497.334                                                               | √                         | √             | √                 |                   |                |
| 498.218                                                               | √                         | √             |                   | √                 | √              |
| 499.944                                                               | √                         | √             | √                 |                   | √              |
| 513.279                                                               | √                         |               |                   |                   | √              |
| 520.354                                                               |                           | √             |                   | √                 | √              |
| 522.376                                                               |                           | √             | √                 | √                 | √              |
| 524.406                                                               | √                         | √             | √                 | √                 | √              |
| 529.913                                                               |                           | √             |                   |                   | √              |
| 534.298                                                               |                           |               | √                 | √                 | √              |
| 544.243                                                               | √                         | √             | √                 |                   | √              |
| 557.216                                                               | √                         | √             | √                 | √                 | √              |
| 572.097                                                               | √                         | √             | √                 | √                 | √              |
| 588.999                                                               |                           |               |                   |                   | √              |
| 614.203                                                               | √                         | √             | √                 | √                 | √              |
| 616.225                                                               | √                         | √             | √                 | √                 | √              |
| 630.204                                                               |                           |               |                   |                   | √              |
| 631.207                                                               | √                         | √             | √                 | √                 | √              |
| 632.217                                                               | √                         | √             | √                 | √                 | √              |
| 646.173                                                               |                           |               |                   |                   | √              |
| 648.180                                                               | √                         | √             | √                 | √                 | √              |
| 750.145                                                               |                           |               | √                 | √                 | √              |
| 751.951                                                               | √                         | √             | √                 | √                 | √              |
| 753.911                                                               |                           | √             | √                 | √                 | √              |
| 756.511                                                               | √                         | √             | √                 | √                 | √              |
| 758.570                                                               | √                         | √             | √                 | √                 | √              |

| Detected<br>metabolite ion<br>signals <sup>a)</sup><br>( <i>m/z</i> ) | Rat liver tissue sections |               |                   |                   |                |
|-----------------------------------------------------------------------|---------------------------|---------------|-------------------|-------------------|----------------|
|                                                                       | Control (No<br>embedding) | Ice-embedding | Agarose-embedding | Gelatin-embedding | PAAG-embedding |
| 760.593                                                               | √                         | √             | √                 | √                 | √              |
| 772.499                                                               | √                         | √             | √                 | √                 | √              |
| 775.894                                                               | √                         | √             | √                 | √                 | √              |
| 781.147                                                               | √                         | √             | √                 |                   | √              |
| 782.505                                                               | √                         | √             |                   | √                 | √              |
| 784.588                                                               | √                         | √             | √                 | √                 | √              |
| 786.612                                                               | √                         | √             | √                 | √                 | √              |
| 796.489                                                               | √                         | √             | √                 | √                 | √              |
| 797.153                                                               |                           |               | √                 |                   | √              |
| 798.522                                                               | √                         | √             | √                 | √                 |                |
| 799.054                                                               |                           |               | √                 |                   | √              |
| 800.111                                                               |                           |               |                   | √                 | √              |
| 804.543                                                               | √                         | √             |                   |                   | √              |
| 806.577                                                               | √                         | √             | √                 | √                 | √              |
| 808.581                                                               | √                         | √             | √                 | √                 | √              |
| 810.614                                                               | √                         | √             | √                 | √                 | √              |
| 812.734                                                               | √                         | √             |                   |                   | √              |
| 815.130                                                               | √                         | √             |                   | √                 | √              |
| 818.511                                                               | √                         | √             | √                 | √                 | √              |
| 820.502                                                               | √                         | √             | √                 | √                 | √              |
| 822.520                                                               | √                         | √             | √                 | √                 | √              |
| 824.467                                                               | √                         | √             |                   | √                 | √              |
| 828.533                                                               | √                         | √             | √                 | √                 | √              |
| 830.535                                                               | √                         | √             | √                 | √                 | √              |
| 831.040                                                               |                           | √             |                   |                   | √              |
| 832.524                                                               | √                         | √             |                   |                   | √              |
| 834.579                                                               | √                         | √             | √                 | √                 | √              |
| 838.553                                                               | √                         |               |                   |                   |                |
| 842.986                                                               |                           | √             | √                 |                   | √              |
| 844.458                                                               | √                         | √             | √                 | √                 | √              |
| 846.519                                                               | √                         | √             | √                 | √                 | √              |
| 847.018                                                               |                           | √             |                   |                   | √              |
| 848.521                                                               | √                         | √             |                   | √                 | √              |

| Detected metabolite ion signals <sup>a)</sup><br>( <i>m/z</i> ) | Rat liver tissue sections |               |                   |                   |                |
|-----------------------------------------------------------------|---------------------------|---------------|-------------------|-------------------|----------------|
|                                                                 | Control (No embedding)    | Ice-embedding | Agarose-embedding | Gelatin-embedding | PAAG-embedding |
| 850.532                                                         | √                         |               | √                 | √                 |                |
| 851.482                                                         | √                         |               |                   |                   |                |
| 852.444                                                         | √                         |               |                   | √                 | √              |
| 868.425                                                         | √                         | √             | √                 | √                 | √              |
| 870.447                                                         |                           |               |                   |                   | √              |
| 872.478                                                         | √                         | √             | √                 | √                 | √              |
| 874.482                                                         | √                         |               |                   |                   |                |
| 925.463                                                         | √                         | √             | √                 | √                 | √              |
| 946.157                                                         | √                         | √             | √                 |                   | √              |
| 948.106                                                         | √                         | √             | √                 | √                 | √              |
| 950.116                                                         | √                         |               | √                 | √                 | √              |
| 953.510                                                         |                           | √             |                   |                   | √              |
| 973.474                                                         | √                         | √             | √                 | √                 | √              |
| 980.008                                                         | √                         |               | √                 | √                 | √              |
| 1374.009                                                        |                           |               | √                 |                   |                |
| 1401.770                                                        | √                         |               |                   |                   |                |
| 1569.135                                                        | √                         |               |                   |                   |                |
| Total number of detected compounds                              | 104                       | 100           | 93                | 85                | 135            |

a) Detected metabolite ion signal data were duplicate values obtained from three parallel detection of each group (n=3\*3).

**Table S3.** Comparison of metabolite ion signals detected in the tissue sections of rat livers embedded with or without ice, agarose, gelatin, and PAAG, by (-)MALDI-TOF/TOF MS using MEK as the matrix (n=3×3).

| Detected metabolite ion signals <sup>a)</sup><br>( <i>m/z</i> ) | Rat liver tissue sections |               |                   |                   |                |
|-----------------------------------------------------------------|---------------------------|---------------|-------------------|-------------------|----------------|
|                                                                 | Control (No embedding)    | Ice-embedding | Agarose-embedding | Gelatin-embedding | PAAG-embedding |
| 100.248                                                         | √                         | √             | √                 | √                 | √              |
| 101.247                                                         | √                         | √             | √                 | √                 | √              |
| 104.239                                                         |                           |               |                   |                   | √              |
| 109.201                                                         |                           |               |                   |                   | √              |
| 110.164                                                         |                           | √             | √                 | √                 | √              |
| 111.171                                                         | √                         | √             | √                 | √                 | √              |
| 113.166                                                         | √                         | √             | √                 | √                 | √              |
| 115.176                                                         |                           |               | √                 |                   | √              |
| 116.190                                                         |                           | √             | √                 |                   | √              |
| 119.189                                                         | √                         | √             | √                 | √                 | √              |
| 120.167                                                         |                           | √             | √                 |                   |                |
| 121.133                                                         |                           |               | √                 |                   |                |
| 122.131                                                         | √                         | √             | √                 | √                 | √              |
| 123.115                                                         | √                         | √             | √                 | √                 | √              |
| 124.139                                                         | √                         | √             | √                 | √                 | √              |
| 125.131                                                         |                           | √             | √                 | √                 | √              |
| 126.137                                                         | √                         |               | √                 |                   | √              |
| 127.183                                                         |                           |               |                   | √                 | √              |
| 128.153                                                         |                           |               |                   |                   | √              |
| 129.177                                                         |                           |               |                   |                   | √              |
| 133.127                                                         | √                         | √             | √                 |                   | √              |
| 134.118                                                         | √                         | √             | √                 | √                 | √              |
| 135.111                                                         | √                         | √             | √                 | √                 | √              |
| 137.095                                                         | √                         | √             | √                 | √                 | √              |
| 140.094                                                         | √                         | √             | √                 | √                 | √              |
| 142.127                                                         |                           |               | √                 | √                 | √              |
| 143.126                                                         |                           |               | √                 |                   | √              |
| 145.146                                                         |                           | √             | √                 |                   | √              |
| 146.126                                                         | √                         |               | √                 |                   | √              |
| 148.152                                                         | √                         | √             | √                 | √                 | √              |
| 150.089                                                         | √                         | √             | √                 | √                 | √              |
| 151.086                                                         | √                         | √             | √                 | √                 | √              |

| Detected metabolite ion signals <sup>a)</sup><br>( <i>m/z</i> ) | Rat liver tissue sections |               |                   |                   |                |
|-----------------------------------------------------------------|---------------------------|---------------|-------------------|-------------------|----------------|
|                                                                 | Control (No embedding)    | Ice-embedding | Agarose-embedding | Gelatin-embedding | PAAG-embedding |
| 152.068                                                         | √                         | √             | √                 | √                 | √              |
| 153.057                                                         | √                         | √             | √                 | √                 | √              |
| 158.062                                                         | √                         | √             | √                 | √                 | √              |
| 159.073                                                         | √                         |               |                   |                   |                |
| 161.089                                                         |                           |               | √                 | √                 |                |
| 163.066                                                         |                           | √             | √                 | √                 | √              |
| 164.143                                                         |                           | √             |                   | √                 |                |
| 166.025                                                         | √                         |               | √                 | √                 | √              |
| 168.050                                                         | √                         | √             |                   | √                 | √              |
| 171.043                                                         |                           |               | √                 | √                 | √              |
| 178.043                                                         |                           |               | √                 |                   | √              |
| 179.037                                                         | √                         | √             | √                 | √                 | √              |
| 180.054                                                         | √                         | √             | √                 | √                 | √              |
| 191.042                                                         | √                         |               |                   |                   |                |
| 192.118                                                         | √                         |               |                   | √                 |                |
| 193.049                                                         | √                         |               |                   |                   | √              |
| 194.041                                                         |                           |               |                   |                   | √              |
| 195.050                                                         |                           |               | √                 | √                 | √              |
| 196.038                                                         | √                         | √             | √                 | √                 | √              |
| 198.880                                                         |                           |               |                   |                   | √              |
| 207.060                                                         |                           |               | √                 |                   | √              |
| 208.048                                                         |                           |               |                   |                   | √              |
| 209.074                                                         |                           |               |                   | √                 | √              |
| 213.038                                                         |                           |               | √                 |                   | √              |
| 214.004                                                         | √                         |               | √                 | √                 | √              |
| 221.030                                                         |                           | √             | √                 |                   | √              |
| 223.050                                                         | √                         | √             | √                 | √                 | √              |
| 224.071                                                         | √                         | √             | √                 | √                 | √              |
| 235.036                                                         |                           |               | √                 |                   | √              |
| 237.058                                                         | √                         | √             | √                 | √                 | √              |
| 240.098                                                         |                           |               | √                 | √                 | √              |
| 240.972                                                         | √                         | √             | √                 | √                 | √              |
| 247.029                                                         |                           |               | √                 |                   | √              |
| 249.045                                                         |                           | √             | √                 | √                 | √              |



| Detected metabolite ion signals <sup>a)</sup><br>( <i>m/z</i> ) | Rat liver tissue sections |               |                   |                   |                |
|-----------------------------------------------------------------|---------------------------|---------------|-------------------|-------------------|----------------|
|                                                                 | Control (No embedding)    | Ice-embedding | Agarose-embedding | Gelatin-embedding | PAAG-embedding |
| 251.068                                                         | √                         | √             | √                 | √                 | √              |
| 252.083                                                         | √                         | √             | √                 | √                 | √              |
| 253.130                                                         |                           | √             | √                 |                   | √              |
| 255.191                                                         | √                         | √             | √                 | √                 | √              |
| 258.985                                                         | √                         | √             | √                 | √                 | √              |
| 262.891                                                         | √                         | √             | √                 | √                 | √              |
| 265.083                                                         | √                         | √             | √                 | √                 | √              |
| 266.106                                                         | √                         | √             | √                 | √                 | √              |
| 267.106                                                         | √                         | √             | √                 | √                 | √              |
| 273.786                                                         | √                         | √             | √                 | √                 | √              |
| 274.545                                                         |                           | √             | √                 | √                 | √              |
| 277.122                                                         |                           |               | √                 |                   | √              |
| 279.168                                                         | √                         | √             | √                 | √                 | √              |
| 281.180                                                         | √                         | √             | √                 | √                 | √              |
| 283.205                                                         | √                         | √             | √                 | √                 | √              |
| 291.033                                                         | √                         | √             | √                 | √                 | √              |
| 293.047                                                         | √                         | √             | √                 |                   | √              |
| 295.090                                                         |                           | √             | √                 | √                 | √              |
| 296.225                                                         | √                         | √             | √                 | √                 | √              |
| 299.111                                                         | √                         | √             |                   |                   | √              |
| 301.851                                                         |                           |               |                   |                   | √              |
| 302.800                                                         |                           |               |                   |                   | √              |
| 303.253                                                         | √                         | √             | √                 | √                 | √              |
| 303.681                                                         |                           | √             |                   |                   | √              |
| 305.274                                                         | √                         | √             | √                 | √                 | √              |
| 307.245                                                         | √                         | √             | √                 | √                 | √              |
| 309.252                                                         | √                         | √             | √                 | √                 | √              |
| 311.229                                                         |                           |               | √                 |                   | √              |
| 314.997                                                         |                           | √             |                   |                   |                |
| 315.064                                                         | √                         | √             | √                 | √                 | √              |
| 321.209                                                         | √                         | √             | √                 | √                 | √              |
| 322.736                                                         |                           |               |                   |                   | √              |
| 323.212                                                         | √                         | √             | √                 | √                 | √              |
| 323.754                                                         |                           |               |                   |                   | √              |

| Detected metabolite ion signals <sup>a)</sup><br>( <i>m/z</i> ) | Rat liver tissue sections |               |                   |                   |                |
|-----------------------------------------------------------------|---------------------------|---------------|-------------------|-------------------|----------------|
|                                                                 | Control (No embedding)    | Ice-embedding | Agarose-embedding | Gelatin-embedding | PAAG-embedding |
| 325.239                                                         | √                         | √             | √                 | √                 | √              |
| 327.239                                                         | √                         | √             | √                 | √                 | √              |
| 329.261                                                         |                           |               | √                 |                   | √              |
| 331.275                                                         |                           |               | √                 |                   | √              |
| 339.200                                                         | √                         | √             | √                 | √                 | √              |
| 349.208                                                         |                           |               | √                 |                   | √              |
| 353.262                                                         | √                         | √             | √                 | √                 | √              |
| 355.070                                                         | √                         | √             | √                 | √                 | √              |
| 362.239                                                         | √                         | √             | √                 | √                 | √              |
| 370.201                                                         |                           |               | √                 |                   | √              |
| 371.203                                                         | √                         | √             | √                 | √                 | √              |
| 384.225                                                         |                           |               | √                 |                   | √              |
| 386.242                                                         | √                         |               | √                 |                   | √              |
| 388.256                                                         | √                         |               | √                 | √                 | √              |
| 391.234                                                         | √                         | √             | √                 | √                 | √              |
| 399.226                                                         |                           |               |                   | √                 | √              |
| 409.254                                                         | √                         | √             | √                 | √                 | √              |
| 414.268                                                         | √                         | √             | √                 | √                 | √              |
| 417.248                                                         | √                         |               |                   | √                 | √              |
| 419.264                                                         | √                         | √             | √                 | √                 | √              |
| 428.281                                                         |                           |               | √                 | √                 | √              |
| 430.194                                                         |                           |               |                   |                   | √              |
| 433.246                                                         |                           |               |                   | √                 | √              |
| 435.263                                                         | √                         | √             | √                 | √                 | √              |
| 437.258                                                         | √                         | √             | √                 | √                 | √              |
| 442.283                                                         | √                         | √             | √                 | √                 | √              |
| 447.274                                                         | √                         | √             | √                 | √                 | √              |
| 452.284                                                         | √                         | √             | √                 | √                 | √              |
| 457.229                                                         | √                         |               |                   |                   |                |
| 459.255                                                         | √                         |               |                   |                   |                |
| 462.299                                                         | √                         | √             | √                 | √                 | √              |
| 463.266                                                         | √                         |               | √                 | √                 | √              |
| 465.298                                                         | √                         | √             | √                 | √                 | √              |
| 470.288                                                         | √                         | √             | √                 | √                 | √              |

| Detected metabolite ion signals <sup>a)</sup><br>( <i>m/z</i> ) | Rat liver tissue sections |               |                   |                   |                |
|-----------------------------------------------------------------|---------------------------|---------------|-------------------|-------------------|----------------|
|                                                                 | Control (No embedding)    | Ice-embedding | Agarose-embedding | Gelatin-embedding | PAAG-embedding |
| 472.283                                                         | √                         |               | √                 |                   | √              |
| 473.264                                                         | √                         |               |                   |                   |                |
| 474.242                                                         |                           |               | √                 |                   | √              |
| 475.266                                                         | √                         | √             | √                 | √                 | √              |
| 478.298                                                         | √                         | √             | √                 | √                 | √              |
| 480.318                                                         | √                         | √             | √                 | √                 | √              |
| 485.981                                                         |                           |               | √                 |                   | √              |
| 488.251                                                         | √                         |               | √                 |                   | √              |
| 498.312                                                         | √                         |               | √                 | √                 | √              |
| 500.296                                                         | √                         | √             | √                 | √                 | √              |
| 502.279                                                         | √                         |               | √                 | √                 | √              |
| 504.273                                                         | √                         | √             | √                 | √                 | √              |
| 506.323                                                         | √                         | √             | √                 | √                 | √              |
| 508.325                                                         | √                         | √             | √                 | √                 | √              |
| 514.312                                                         | √                         | √             | √                 | √                 | √              |
| 518.318                                                         | √                         | √             | √                 | √                 | √              |
| 524.292                                                         | √                         | √             | √                 | √                 | √              |
| 532.330                                                         | √                         | √             | √                 | √                 | √              |
| 546.342                                                         | √                         | √             | √                 | √                 | √              |
| 559.359                                                         |                           |               | √                 | √                 | √              |
| 561.342                                                         |                           |               | √                 |                   | √              |
| 571.300                                                         | √                         | √             | √                 | √                 | √              |
| 574.380                                                         |                           |               | √                 | √                 | √              |
| 576.368                                                         | √                         | √             | √                 | √                 | √              |
| 581.319                                                         | √                         | √             | √                 | √                 | √              |
| 583.340                                                         | √                         | √             | √                 | √                 | √              |
| 587.362                                                         | √                         | √             | √                 | √                 | √              |
| 589.386                                                         | √                         | √             | √                 | √                 | √              |
| 591.405                                                         |                           |               | √                 | √                 | √              |
| 599.338                                                         | √                         | √             | √                 | √                 | √              |
| 603.366                                                         |                           | √             | √                 | √                 | √              |
| 615.400                                                         | √                         | √             | √                 |                   | √              |
| 617.420                                                         | √                         | √             | √                 | √                 | √              |
| 619.394                                                         | √                         | √             | √                 | √                 | √              |

| Detected metabolite ion signals <sup>a)</sup><br>( <i>m/z</i> ) | Rat liver tissue sections |               |                   |                   |                |
|-----------------------------------------------------------------|---------------------------|---------------|-------------------|-------------------|----------------|
|                                                                 | Control (No embedding)    | Ice-embedding | Agarose-embedding | Gelatin-embedding | PAAG-embedding |
| 642.505                                                         | √                         |               | √                 | √                 | √              |
| 645.431                                                         | √                         | √             | √                 | √                 | √              |
| 647.432                                                         | √                         | √             | √                 | √                 | √              |
| 656.528                                                         |                           |               |                   | √                 | √              |
| 671.449                                                         |                           | √             | √                 |                   | √              |
| 673.482                                                         | √                         | √             | √                 | √                 | √              |
| 687.552                                                         | √                         | √             | √                 | √                 | √              |
| 695.442                                                         |                           |               | √                 |                   | √              |
| 697.477                                                         | √                         | √             | √                 | √                 | √              |
| 699.500                                                         | √                         | √             | √                 | √                 | √              |
| 701.519                                                         | √                         |               | √                 | √                 | √              |
| 714.505                                                         | √                         | √             | √                 | √                 | √              |
| 716.513                                                         | √                         | √             | √                 | √                 | √              |
| 719.463                                                         | √                         | √             | √                 | √                 | √              |
| 721.469                                                         | √                         | √             | √                 | √                 | √              |
| 722.518                                                         |                           |               | √                 |                   |                |
| 723.503                                                         | √                         | √             | √                 | √                 | √              |
| 725.518                                                         | √                         | √             | √                 | √                 | √              |
| 726.563                                                         | √                         | √             | √                 | √                 | √              |
| 728.583                                                         |                           |               | √                 | √                 | √              |
| 738.502                                                         | √                         | √             | √                 | √                 | √              |
| 740.524                                                         | √                         | √             | √                 | √                 | √              |
| 742.540                                                         | √                         | √             | √                 | √                 | √              |
| 744.541                                                         | √                         |               | √                 |                   | √              |
| 745.533                                                         | √                         |               | √                 | √                 | √              |
| 747.507                                                         | √                         | √             | √                 | √                 | √              |
| 749.519                                                         | √                         | √             | √                 | √                 | √              |
| 750.513                                                         |                           |               | √                 |                   | √              |
| 752.581                                                         |                           |               | √                 | √                 | √              |
| 762.507                                                         | √                         | √             | √                 | √                 | √              |
| 764.540                                                         | √                         | √             | √                 | √                 | √              |
| 766.556                                                         | √                         | √             | √                 | √                 | √              |
| 770.586                                                         | √                         | √             | √                 | √                 | √              |
| 771.633                                                         |                           |               |                   | √                 | √              |

| Detected metabolite ion signals <sup>a)</sup><br>( <i>m/z</i> ) | Rat liver tissue sections |               |                   |                   |                |
|-----------------------------------------------------------------|---------------------------|---------------|-------------------|-------------------|----------------|
|                                                                 | Control (No embedding)    | Ice-embedding | Agarose-embedding | Gelatin-embedding | PAAG-embedding |
| 788.538                                                         | √                         | √             | √                 | √                 | √              |
| 790.555                                                         | √                         | √             | √                 | √                 | √              |
| 792.595                                                         | √                         |               | √                 | √                 | √              |
| 794.604                                                         | √                         |               | √                 | √                 | √              |
| 797.694                                                         | √                         |               | √                 | √                 | √              |
| 818.549                                                         |                           |               |                   | √                 |                |
| 833.554                                                         | √                         | √             | √                 | √                 | √              |
| 835.565                                                         |                           |               |                   | √                 | √              |
| 857.545                                                         | √                         | √             | √                 | √                 | √              |
| 859.570                                                         | √                         |               | √                 | √                 | √              |
| 861.585                                                         | √                         | √             | √                 | √                 | √              |
| 871.548                                                         |                           |               | √                 | √                 | √              |
| 883.525                                                         |                           | √             | √                 | √                 | √              |
| 885.586                                                         | √                         | √             | √                 | √                 | √              |
| 887.669                                                         | √                         | √             | √                 | √                 | √              |
| 909.639                                                         | √                         | √             | √                 | √                 | √              |
| 911.658                                                         | √                         | √             | √                 | √                 | √              |
| 913.671                                                         |                           | √             | √                 | √                 | √              |
| 1207.926                                                        | √                         | √             | √                 | √                 | √              |
| 1209.922                                                        | √                         | √             |                   | √                 | √              |
| 1470.302                                                        |                           |               |                   | √                 | √              |
| 1472.409                                                        |                           |               |                   |                   | √              |
| 1485.748                                                        | √                         | √             |                   |                   |                |
| Total number of detected compounds                              | 152                       | 143           | 188               | 166               | 211            |

a) Detected metabolite ion signal data were duplicate values obtained from three parallel detection of each group (n=3×3).

**Table S4.** Comparison of metabolite ion signals detected in the tissue sections of Atlantic salmon eyeballs embedded with OCT, agarose, gelatin, and PAAG, respectively, by (+)MALDI-TOF/TOF MS using 2-MBT as the matrix (n=3×3).

| Detected metabolite<br>ion signals <sup>a)</sup> ( <i>m/z</i> ) | Atlantic salmon eyeball tissue sections |                   |                   |                |
|-----------------------------------------------------------------|-----------------------------------------|-------------------|-------------------|----------------|
|                                                                 | OCT-embedding                           | Agarose-embedding | Gelatin-embedding | PAAG-embedding |
| 104.345                                                         |                                         | √                 | √                 | √              |
| 105.162                                                         |                                         |                   | √                 |                |
| 132.182                                                         |                                         |                   | √                 | √              |
| 136.104                                                         | √                                       | √                 | √                 | √              |
| 147.038                                                         |                                         |                   |                   | √              |
| 156.107                                                         |                                         |                   |                   | √              |
| 166.066                                                         |                                         |                   |                   | √              |
| 166.977                                                         | √                                       | √                 |                   | √              |
| 167.993                                                         | √                                       | √                 | √                 | √              |
| 169.018                                                         | √                                       | √                 |                   | √              |
| 170.008                                                         | √                                       | √                 | √                 | √              |
| 184.057                                                         | √                                       | √                 | √                 | √              |
| 189.979                                                         | √                                       | √                 | √                 | √              |
| 191.972                                                         |                                         |                   |                   | √              |
| 198.067                                                         |                                         |                   |                   | √              |
| 199.944                                                         |                                         |                   |                   | √              |
| 205.947                                                         | √                                       |                   | √                 | √              |
| 211.945                                                         |                                         |                   |                   | √              |
| 227.913                                                         |                                         |                   |                   | √              |
| 238.995                                                         |                                         |                   |                   | √              |
| 243.889                                                         |                                         |                   | √                 | √              |
| 253.038                                                         |                                         |                   |                   | √              |
| 256.987                                                         |                                         |                   |                   | √              |
| 258.080                                                         |                                         | √                 |                   | √              |
| 259.015                                                         | √                                       | √                 | √                 | √              |
| 269.003                                                         | √                                       | √                 | √                 | √              |
| 270.010                                                         | √                                       | √                 | √                 | √              |
| 275.967                                                         |                                         |                   |                   | √              |
| 279.080                                                         |                                         |                   |                   | √              |
| 280.079                                                         |                                         |                   | √                 | √              |
| 291.000                                                         | √                                       | √                 |                   | √              |
| 296.063                                                         |                                         |                   | √                 | √              |

| Detected metabolite<br>ion signals <sup>a)</sup> (m/z) | Atlantic salmon eyeball tissue sections |                   |                   |                |
|--------------------------------------------------------|-----------------------------------------|-------------------|-------------------|----------------|
|                                                        | OCT-embedding                           | Agarose-embedding | Gelatin-embedding | PAAG-embedding |
| 300.986                                                | √                                       | √                 | √                 | √              |
| 302.996                                                | √                                       | √                 |                   | √              |
| 312.364                                                |                                         |                   |                   | √              |
| 322.976                                                |                                         |                   | √                 | √              |
| 332.962                                                | √                                       | √                 | √                 | √              |
| 334.004                                                |                                         | √                 |                   | √              |
| 334.980                                                | √                                       | √                 | √                 | √              |
| 336.976                                                |                                         | √                 |                   | √              |
| 346.995                                                |                                         | √                 |                   | √              |
| 354.981                                                | √                                       | √                 |                   | √              |
| 356.982                                                |                                         |                   | √                 | √              |
| 364.941                                                |                                         |                   |                   | √              |
| 366.939                                                | √                                       |                   |                   | √              |
| 370.943                                                |                                         |                   | √                 | √              |
| 386.955                                                | √                                       |                   | √                 | √              |
| 390.047                                                |                                         | √                 | √                 | √              |
| 392.066                                                | √                                       | √                 | √                 | √              |
| 396.910                                                | √                                       | √                 | √                 | √              |
| 398.909                                                | √                                       | √                 | √                 | √              |
| 400.402                                                |                                         |                   |                   | √              |
| 400.904                                                |                                         |                   |                   | √              |
| 404.043                                                |                                         |                   |                   | √              |
| 406.075                                                |                                         |                   |                   | √              |
| 424.038                                                | √                                       | √                 | √                 | √              |
| 426.412                                                | √                                       |                   |                   | √              |
| 428.455                                                | √                                       |                   |                   | √              |
| 436.040                                                | √                                       |                   |                   |                |
| 440.913                                                | √                                       | √                 | √                 | √              |
| 442.889                                                | √                                       | √                 | √                 | √              |
| 456.026                                                | √                                       | √                 | √                 | √              |
| 466.022                                                | √                                       | √                 | √                 | √              |
| 468.013                                                | √                                       | √                 | √                 | √              |
| 468.420                                                | √                                       |                   | √                 | √              |
| 478.419                                                |                                         |                   |                   | √              |
| 482.415                                                | √                                       |                   |                   | √              |

| Detected metabolite<br>ion signals <sup>a)</sup> (m/z) | Atlantic salmon eyeball tissue sections |                   |                   |                |
|--------------------------------------------------------|-----------------------------------------|-------------------|-------------------|----------------|
|                                                        | OCT-embedding                           | Agarose-embedding | Gelatin-embedding | PAAG-embedding |
| 494.328                                                |                                         |                   |                   | √              |
| 496.375                                                | √                                       | √                 | √                 | √              |
| 497.992                                                |                                         | √                 | √                 | √              |
| 499.983                                                |                                         |                   |                   | √              |
| 504.435                                                |                                         |                   |                   | √              |
| 508.482                                                | √                                       | √                 | √                 | √              |
| 515.113                                                |                                         | √                 |                   | √              |
| 518.379                                                | √                                       |                   | √                 | √              |
| 522.396                                                | √                                       | √                 | √                 | √              |
| 524.408                                                | √                                       | √                 | √                 | √              |
| 525.117                                                | √                                       | √                 | √                 | √              |
| 529.960                                                | √                                       | √                 | √                 | √              |
| 531.924                                                | √                                       | √                 |                   | √              |
| 534.360                                                | √                                       |                   | √                 | √              |
| 540.991                                                | √                                       | √                 | √                 | √              |
| 544.380                                                | √                                       | √                 | √                 | √              |
| 546.366                                                |                                         |                   | √                 |                |
| 550.385                                                |                                         | √                 |                   |                |
| 557.088                                                | √                                       | √                 | √                 | √              |
| 558.974                                                |                                         | √                 |                   |                |
| 560.316                                                |                                         |                   | √                 |                |
| 561.911                                                | √                                       | √                 | √                 | √              |
| 563.868                                                | √                                       |                   | √                 |                |
| 568.374                                                | √                                       | √                 | √                 | √              |
| 573.926                                                | √                                       | √                 | √                 | √              |
| 589.041                                                | √                                       | √                 | √                 | √              |
| 590.362                                                | √                                       | √                 | √                 | √              |
| 606.349                                                |                                         | √                 | √                 | √              |
| 614.266                                                | √                                       | √                 | √                 | √              |
| 615.253                                                |                                         | √                 |                   | √              |
| 616.275                                                | √                                       | √                 | √                 | √              |
| 617.329                                                | √                                       | √                 | √                 | √              |
| 630.278                                                |                                         | √                 | √                 | √              |
| 631.265                                                | √                                       | √                 | √                 | √              |
| 632.270                                                | √                                       | √                 | √                 | √              |



| Detected metabolite<br>ion signals <sup>a)</sup> (m/z) | Atlantic salmon eyeball tissue sections |                   |                   |                |
|--------------------------------------------------------|-----------------------------------------|-------------------|-------------------|----------------|
|                                                        | OCT-embedding                           | Agarose-embedding | Gelatin-embedding | PAAG-embedding |
| 638.259                                                | √                                       | √                 | √                 | √              |
| 639.247                                                | √                                       |                   | √                 | √              |
| 646.279                                                |                                         | √                 |                   | √              |
| 647.240                                                | √                                       |                   |                   |                |
| 648.260                                                | √                                       | √                 | √                 | √              |
| 655.066                                                |                                         |                   | √                 | √              |
| 675.524                                                |                                         | √                 | √                 | √              |
| 676.593                                                | √                                       | √                 | √                 | √              |
| 678.615                                                | √                                       | √                 | √                 | √              |
| 683.972                                                | √                                       |                   | √                 | √              |
| 690.525                                                | √                                       |                   |                   |                |
| 697.504                                                |                                         | √                 | √                 | √              |
| 698.561                                                | √                                       |                   | √                 | √              |
| 700.601                                                | √                                       | √                 | √                 | √              |
| 702.577                                                |                                         |                   | √                 |                |
| 704.623                                                | √                                       | √                 | √                 | √              |
| 706.644                                                | √                                       | √                 | √                 | √              |
| 711.924                                                | √                                       |                   | √                 | √              |
| 713.498                                                |                                         |                   | √                 |                |
| 714.558                                                | √                                       |                   |                   | √              |
| 716.587                                                | √                                       | √                 | √                 | √              |
| 718.630                                                | √                                       | √                 | √                 | √              |
| 721.980                                                |                                         | √                 | √                 |                |
| 724.576                                                | √                                       |                   |                   | √              |
| 725.569                                                |                                         |                   | √                 |                |
| 726.612                                                | √                                       | √                 | √                 | √              |
| 728.620                                                | √                                       | √                 | √                 | √              |
| 730.580                                                | √                                       | √                 | √                 | √              |
| 732.625                                                | √                                       | √                 | √                 | √              |
| 739.998                                                | √                                       | √                 | √                 | √              |
| 742.568                                                | √                                       | √                 | √                 | √              |
| 744.592                                                | √                                       | √                 | √                 | √              |
| 746.575                                                | √                                       | √                 | √                 | √              |
| 752.588                                                | √                                       | √                 | √                 | √              |
| 754.618                                                | √                                       | √                 | √                 | √              |

| Detected metabolite<br>ion signals <sup>a)</sup> (m/z) | Atlantic salmon eyeball tissue sections |                   |                   |                |
|--------------------------------------------------------|-----------------------------------------|-------------------|-------------------|----------------|
|                                                        | OCT-embedding                           | Agarose-embedding | Gelatin-embedding | PAAG-embedding |
| 756.574                                                |                                         | √                 | √                 | √              |
| 758.574                                                | √                                       | √                 | √                 | √              |
| 760.583                                                | √                                       | √                 | √                 | √              |
| 766.570                                                | √                                       | √                 | √                 | √              |
| 768.588                                                | √                                       | √                 | √                 | √              |
| 770.598                                                | √                                       | √                 | √                 | √              |
| 772.616                                                | √                                       | √                 | √                 | √              |
| 774.620                                                |                                         | √                 | √                 | √              |
| 778.540                                                | √                                       | √                 | √                 |                |
| 780.547                                                | √                                       | √                 | √                 | √              |
| 782.596                                                | √                                       | √                 | √                 | √              |
| 786.618                                                | √                                       | √                 | √                 | √              |
| 788.635                                                | √                                       | √                 | √                 | √              |
| 792.573                                                |                                         | √                 | √                 | √              |
| 794.608                                                | √                                       | √                 | √                 | √              |
| 798.582                                                | √                                       | √                 | √                 | √              |
| 802.569                                                |                                         | √                 |                   |                |
| 804.382                                                |                                         | √                 |                   | √              |
| 806.538                                                | √                                       | √                 | √                 | √              |
| 808.581                                                | √                                       | √                 | √                 | √              |
| 810.627                                                | √                                       | √                 | √                 | √              |
| 813.667                                                | √                                       | √                 | √                 | √              |
| 814.619                                                |                                         | √                 |                   |                |
| 818.537                                                | √                                       | √                 | √                 | √              |
| 820.586                                                |                                         | √                 |                   |                |
| 824.592                                                | √                                       | √                 | √                 | √              |
| 826.646                                                | √                                       | √                 | √                 | √              |
| 828.542                                                | √                                       | √                 | √                 | √              |
| 830.540                                                |                                         |                   |                   | √              |
| 832.565                                                | √                                       | √                 | √                 | √              |
| 834.555                                                | √                                       | √                 | √                 | √              |
| 835.626                                                | √                                       | √                 |                   | √              |
| 842.549                                                |                                         | √                 |                   | √              |
| 844.514                                                | √                                       | √                 | √                 | √              |
| 846.542                                                |                                         |                   | √                 | √              |

| Detected metabolite<br>ion signals <sup>a)</sup> (m/z) | Atlantic salmon eyeball tissue sections |                   |                   |                |
|--------------------------------------------------------|-----------------------------------------|-------------------|-------------------|----------------|
|                                                        | OCT-embedding                           | Agarose-embedding | Gelatin-embedding | PAAG-embedding |
| 852.608                                                |                                         | √                 |                   |                |
| 854.568                                                | √                                       | √                 |                   | √              |
| 856.520                                                | √                                       | √                 | √                 | √              |
| 863.558                                                | √                                       | √                 | √                 | √              |
| 870.620                                                |                                         | √                 |                   |                |
| 872.571                                                |                                         | √                 | √                 | √              |
| 876.588                                                |                                         | √                 |                   |                |
| 878.427                                                | √                                       | √                 | √                 | √              |
| 900.477                                                | √                                       | √                 | √                 |                |
| 909.559                                                | √                                       |                   |                   |                |
| 916.631                                                |                                         | √                 | √                 |                |
| 925.515                                                |                                         | √                 | √                 | √              |
| 927.482                                                |                                         | √                 | √                 | √              |
| 947.988                                                | √                                       | √                 | √                 | √              |
| 950.158                                                |                                         | √                 |                   |                |
| 973.418                                                |                                         | √                 | √                 | √              |
| 993.581                                                | √                                       |                   |                   |                |
| 995.565                                                | √                                       |                   |                   |                |
| 1001.637                                               |                                         | √                 |                   |                |
| 1018.806                                               |                                         | √                 | √                 |                |
| 1040.781                                               |                                         | √                 | √                 |                |
| 1043.687                                               |                                         | √                 |                   |                |
| 1045.658                                               |                                         | √                 | √                 |                |
| 1183.809                                               |                                         | √                 |                   |                |
| 1185.904                                               |                                         | √                 |                   |                |
| 1231.072                                               |                                         | √                 | √                 | √              |
| 1255.978                                               |                                         |                   | √                 |                |
| 1279.668                                               |                                         |                   | √                 | √              |
| 1281.670                                               |                                         |                   | √                 | √              |
| 1328.272                                               |                                         | √                 | √                 |                |
| 1347.332                                               |                                         |                   | √                 | √              |
| 1373.335                                               | √                                       | √                 |                   | √              |
| 1375.430                                               | √                                       | √                 | √                 | √              |
| 1382.321                                               | √                                       |                   |                   |                |
| 1396.208                                               |                                         | √                 |                   | √              |

| Detected metabolite<br>ion signals <sup>a)</sup> (m/z) | Atlantic salmon eyeball tissue sections |                   |                   |                |
|--------------------------------------------------------|-----------------------------------------|-------------------|-------------------|----------------|
|                                                        | OCT-embedding                           | Agarose-embedding | Gelatin-embedding | PAAG-embedding |
| 1402.442                                               |                                         | √                 | √                 | √              |
| 1404.163                                               |                                         |                   | √                 |                |
| 1409.663                                               | √                                       |                   |                   | √              |
| 1421.390                                               | √                                       | √                 | √                 | √              |
| 1433.733                                               |                                         |                   |                   | √              |
| 1435.665                                               |                                         |                   | √                 | √              |
| 1437.873                                               | √                                       |                   |                   | √              |
| 1449.931                                               |                                         |                   | √                 |                |
| 1450.450                                               |                                         | √                 |                   |                |
| 1457.688                                               |                                         |                   |                   | √              |
| 1461.148                                               | √                                       |                   |                   | √              |
| 1462.524                                               | √                                       |                   |                   |                |
| 1463.820                                               | √                                       | √                 |                   | √              |
| 1465.895                                               |                                         | √                 |                   | √              |
| 1490.626                                               | √                                       |                   |                   |                |
| 1491.854                                               | √                                       |                   |                   | √              |
| 1493.766                                               |                                         | √                 | √                 |                |
| 1511.662                                               | √                                       |                   |                   |                |
| 1512.704                                               |                                         |                   | √                 |                |
| 1513.777                                               | √                                       |                   | √                 | √              |
| 1515.816                                               |                                         |                   |                   | √              |
| 1517.757                                               |                                         | √                 | √                 | √              |
| 1518.697                                               | √                                       |                   |                   |                |
| 1519.876                                               |                                         | √                 | √                 | √              |
| 1538.903                                               |                                         | √                 |                   |                |
| 1540.835                                               | √                                       | √                 | √                 | √              |
| 1546.881                                               | √                                       | √                 | √                 | √              |
| 1562.233                                               |                                         |                   |                   | √              |
| 1563.379                                               |                                         |                   | √                 |                |
| 1565.841                                               | √                                       | √                 | √                 | √              |
| 1571.983                                               |                                         |                   |                   | √              |
| 1573.041                                               |                                         |                   | √                 |                |
| 1586.826                                               |                                         |                   |                   | √              |
| 1588.886                                               | √                                       |                   | √                 |                |
| 1592.098                                               | √                                       | √                 |                   | √              |

| Detected metabolite<br>ion signals <sup>a)</sup> ( <i>m/z</i> ) | Atlantic salmon eyeball tissue sections |                   |                   |                |
|-----------------------------------------------------------------|-----------------------------------------|-------------------|-------------------|----------------|
|                                                                 | OCT-embedding                           | Agarose-embedding | Gelatin-embedding | PAAG-embedding |
| 1594.593                                                        | √                                       | √                 | √                 |                |
| 1597.955                                                        |                                         | √                 |                   |                |
| 1613.495                                                        | √                                       | √                 |                   |                |
| 1615.614                                                        |                                         |                   | √                 | √              |
| 1621.258                                                        |                                         | √                 |                   |                |
| 1637.710                                                        |                                         |                   |                   | √              |
| 1639.442                                                        |                                         | √                 | √                 |                |
| 1639.615                                                        |                                         | √                 | √                 |                |
| 1685.375                                                        |                                         | √                 |                   |                |
| Total number of<br>detected compounds                           | 138                                     | 161               | 158               | 195            |

a) Detected metabolite ion signal data were duplicate values obtained from three parallel detection of each group (n=3×3).

**Table S5.** Comparison of metabolite ion signals detected in the tissue sections of Atlantic salmon eyeballs embedded with OCT, agarose, gelatin, and PAAG, respectively, by (-)MALDI-TOF/TOF MS using MEK as the matrix (n=3×3).

| Detected metabolite<br>ion signals <sup>a)</sup> (m/z) | Atlantic salmon eyeball tissue sections |                   |                   |                |
|--------------------------------------------------------|-----------------------------------------|-------------------|-------------------|----------------|
|                                                        | OCT-embedding                           | Agarose-embedding | Gelatin-embedding | PAAG-embedding |
| 104.078                                                |                                         |                   |                   |                |
| 111.027                                                | √                                       |                   | √                 | √              |
| 113.024                                                | √                                       | √                 | √                 | √              |
| 119.981                                                | √                                       |                   |                   | √              |
| 122.019                                                | √                                       |                   |                   | √              |
| 123.022                                                | √                                       |                   |                   | √              |
| 124.041                                                | √                                       | √                 | √                 | √              |
| 125.044                                                | √                                       |                   |                   | √              |
| 130.123                                                |                                         |                   |                   |                |
| 132.076                                                | √                                       |                   |                   | √              |
| 132.910                                                | √                                       |                   |                   | √              |
| 134.058                                                | √                                       |                   | √                 | √              |
| 135.045                                                | √                                       |                   | √                 | √              |
| 137.065                                                |                                         | √                 |                   |                |
| 138.057                                                | √                                       | √                 |                   | √              |
| 140.047                                                | √                                       |                   |                   | √              |
| 145.109                                                | √                                       | √                 |                   | √              |
| 146.097                                                | √                                       | √                 | √                 | √              |
| 147.006                                                | √                                       |                   |                   | √              |
| 148.126                                                | √                                       | √                 | √                 | √              |
| 150.071                                                | √                                       | √                 | √                 | √              |
| 152.049                                                | √                                       | √                 | √                 | √              |
| 153.049                                                | √                                       | √                 | √                 | √              |
| 154.081                                                | √                                       | √                 | √                 | √              |
| 155.024                                                |                                         | √                 |                   |                |
| 158.048                                                | √                                       |                   | √                 | √              |
| 159.060                                                | √                                       |                   | √                 | √              |
| 164.129                                                |                                         |                   |                   |                |
| 166.025                                                | √                                       | √                 | √                 | √              |
| 168.042                                                | √                                       | √                 | √                 | √              |
| 170.978                                                |                                         | √                 |                   |                |
| 174.092                                                | √                                       |                   |                   | √              |

| Detected metabolite<br>ion signals <sup>a)</sup> ( <i>m/z</i> ) | Atlantic salmon eyeball tissue sections |                   |                   |                |
|-----------------------------------------------------------------|-----------------------------------------|-------------------|-------------------|----------------|
|                                                                 | OCT-embedding                           | Agarose-embedding | Gelatin-embedding | PAAG-embedding |
| 179.066                                                         | √                                       | √                 |                   | √              |
| 180.073                                                         | √                                       | √                 |                   | √              |
| 182.006                                                         | √                                       | √                 | √                 | √              |
| 184.017                                                         | √                                       | √                 |                   | √              |
| 191.057                                                         | √                                       | √                 |                   | √              |
| 192.125                                                         | √                                       |                   |                   | √              |
| 193.035                                                         | √                                       | √                 |                   | √              |
| 196.071                                                         | √                                       | √                 | √                 | √              |
| 197.057                                                         |                                         | √                 | √                 |                |
| 198.023                                                         | √                                       |                   | √                 | √              |
| 207.088                                                         | √                                       |                   |                   | √              |
| 209.006                                                         | √                                       |                   |                   | √              |
| 211.039                                                         | √                                       | √                 |                   | √              |
| 212.055                                                         | √                                       | √                 | √                 | √              |
| 213.074                                                         | √                                       | √                 | √                 | √              |
| 214.044                                                         |                                         | √                 |                   |                |
| 215.109                                                         |                                         |                   | √                 |                |
| 223.082                                                         | √                                       | √                 |                   | √              |
| 224.098                                                         | √                                       | √                 | √                 | √              |
| 236.051                                                         | √                                       | √                 |                   | √              |
| 241.047                                                         |                                         | √                 | √                 |                |
| 245.037                                                         |                                         |                   | √                 |                |
| 249.069                                                         | √                                       | √                 |                   | √              |
| 251.089                                                         | √                                       | √                 | √                 | √              |
| 252.124                                                         | √                                       | √                 | √                 | √              |
| 253.194                                                         | √                                       | √                 | √                 | √              |
| 255.211                                                         | √                                       | √                 | √                 | √              |
| 259.928                                                         |                                         | √                 |                   |                |
| 263.069                                                         | √                                       |                   |                   | √              |
| 264.089                                                         | √                                       |                   |                   | √              |
| 265.099                                                         | √                                       | √                 | √                 | √              |
| 266.116                                                         | √                                       | √                 | √                 | √              |
| 267.119                                                         | √                                       | √                 | √                 | √              |
| 268.125                                                         | √                                       |                   | √                 | √              |
| 279.112                                                         | √                                       | √                 | √                 | √              |

| Detected metabolite<br>ion signals <sup>a)</sup> ( <i>m/z</i> ) | Atlantic salmon eyeball tissue sections |                   |                   |                |
|-----------------------------------------------------------------|-----------------------------------------|-------------------|-------------------|----------------|
|                                                                 | OCT-embedding                           | Agarose-embedding | Gelatin-embedding | PAAG-embedding |
| 281.190                                                         | √                                       | √                 | √                 | √              |
| 283.208                                                         | √                                       | √                 | √                 | √              |
| 291.015                                                         | √                                       | √                 | √                 | √              |
| 292.996                                                         | √                                       | √                 | √                 | √              |
| 295.107                                                         | √                                       | √                 | √                 | √              |
| 296.244                                                         | √                                       | √                 | √                 | √              |
| 301.262                                                         | √                                       | √                 | √                 | √              |
| 303.263                                                         | √                                       | √                 | √                 | √              |
| 307.214                                                         | √                                       | √                 |                   | √              |
| 309.208                                                         | √                                       | √                 | √                 | √              |
| 311.189                                                         | √                                       |                   | √                 | √              |
| 321.189                                                         | √                                       | √                 | √                 | √              |
| 323.210                                                         | √                                       | √                 | √                 | √              |
| 325.236                                                         | √                                       | √                 | √                 | √              |
| 327.232                                                         | √                                       | √                 | √                 | √              |
| 329.251                                                         | √                                       | √                 | √                 | √              |
| 330.203                                                         | √                                       |                   |                   | √              |
| 330.931                                                         | √                                       |                   |                   | √              |
| 331.684                                                         | √                                       |                   |                   | √              |
| 337.205                                                         | √                                       |                   | √                 | √              |
| 339.211                                                         | √                                       | √                 | √                 | √              |
| 349.227                                                         | √                                       | √                 |                   | √              |
| 351.215                                                         | √                                       |                   |                   | √              |
| 353.256                                                         | √                                       | √                 | √                 | √              |
| 354.926                                                         |                                         |                   | √                 |                |
| 355.192                                                         | √                                       | √                 | √                 | √              |
| 357.114                                                         |                                         |                   |                   |                |
| 369.169                                                         | √                                       | √                 |                   | √              |
| 371.187                                                         | √                                       |                   | √                 | √              |
| 375.164                                                         | √                                       |                   |                   | √              |
| 381.197                                                         |                                         |                   |                   |                |
| 383.174                                                         | √                                       |                   | √                 | √              |
| 385.192                                                         | √                                       | √                 | √                 | √              |
| 387.180                                                         | √                                       |                   | √                 | √              |
| 391.215                                                         | √                                       | √                 | √                 | √              |



| Detected metabolite<br>ion signals <sup>a)</sup> ( <i>m/z</i> ) | Atlantic salmon eyeball tissue sections |                   |                   |                |
|-----------------------------------------------------------------|-----------------------------------------|-------------------|-------------------|----------------|
|                                                                 | OCT-embedding                           | Agarose-embedding | Gelatin-embedding | PAAG-embedding |
| 393.070                                                         | √                                       |                   | √                 | √              |
| 394.111                                                         |                                         | √                 |                   |                |
| 395.059                                                         | √                                       | √                 | √                 | √              |
| 397.181                                                         |                                         |                   |                   |                |
| 399.186                                                         | √                                       |                   | √                 | √              |
| 409.227                                                         | √                                       | √                 |                   | √              |
| 414.241                                                         | √                                       | √                 | √                 | √              |
| 417.193                                                         | √                                       | √                 | √                 | √              |
| 419.240                                                         | √                                       | √                 | √                 | √              |
| 425.176                                                         | √                                       |                   | √                 | √              |
| 428.247                                                         | √                                       |                   |                   | √              |
| 429.229                                                         | √                                       |                   |                   | √              |
| 431.218                                                         | √                                       | √                 | √                 | √              |
| 435.239                                                         | √                                       |                   | √                 | √              |
| 437.250                                                         | √                                       | √                 | √                 | √              |
| 441.220                                                         |                                         |                   |                   |                |
| 442.258                                                         | √                                       | √                 | √                 | √              |
| 447.239                                                         | √                                       | √                 |                   | √              |
| 452.260                                                         | √                                       |                   | √                 | √              |
| 457.237                                                         | √                                       |                   | √                 | √              |
| 459.168                                                         |                                         | √                 |                   |                |
| 460.162                                                         |                                         |                   |                   |                |
| 461.161                                                         |                                         | √                 |                   |                |
| 462.273                                                         | √                                       |                   | √                 | √              |
| 463.221                                                         | √                                       | √                 | √                 | √              |
| 464.277                                                         | √                                       |                   | √                 | √              |
| 465.217                                                         | √                                       |                   |                   | √              |
| 467.352                                                         | √                                       | √                 | √                 | √              |
| 470.272                                                         | √                                       | √                 | √                 | √              |
| 472.281                                                         | √                                       | √                 | √                 | √              |
| 474.234                                                         | √                                       | √                 | √                 | √              |
| 475.213                                                         | √                                       |                   | √                 | √              |
| 478.275                                                         | √                                       | √                 | √                 | √              |
| 480.280                                                         | √                                       | √                 | √                 | √              |
| 481.208                                                         | √                                       | √                 | √                 | √              |

| Detected metabolite<br>ion signals <sup>a)</sup> ( <i>m/z</i> ) | Atlantic salmon eyeball tissue sections |                   |                   |                |
|-----------------------------------------------------------------|-----------------------------------------|-------------------|-------------------|----------------|
|                                                                 | OCT-embedding                           | Agarose-embedding | Gelatin-embedding | PAAG-embedding |
| 483.228                                                         | √                                       |                   |                   | √              |
| 485.250                                                         |                                         |                   |                   |                |
| 490.269                                                         | √                                       |                   | √                 | √              |
| 498.282                                                         | √                                       |                   | √                 | √              |
| 500.267                                                         | √                                       |                   | √                 | √              |
| 502.248                                                         | √                                       | √                 |                   | √              |
| 503.163                                                         |                                         | √                 |                   |                |
| 504.234                                                         | √                                       |                   | √                 | √              |
| 505.172                                                         |                                         | √                 | √                 |                |
| 506.262                                                         | √                                       |                   | √                 | √              |
| 507.211                                                         | √                                       | √                 | √                 | √              |
| 509.213                                                         |                                         | √                 |                   |                |
| 514.265                                                         | √                                       |                   | √                 | √              |
| 518.285                                                         | √                                       | √                 | √                 | √              |
| 519.224                                                         |                                         | √                 |                   |                |
| 521.241                                                         |                                         | √                 |                   |                |
| 524.274                                                         | √                                       | √                 | √                 | √              |
| 529.242                                                         |                                         |                   |                   |                |
| 531.235                                                         |                                         | √                 |                   |                |
| 533.291                                                         | √                                       | √                 | √                 | √              |
| 535.214                                                         | √                                       | √                 | √                 | √              |
| 537.218                                                         | √                                       | √                 |                   | √              |
| 546.312                                                         | √                                       | √                 | √                 | √              |
| 548.334                                                         | √                                       |                   | √                 | √              |
| 552.273                                                         | √                                       |                   | √                 | √              |
| 553.182                                                         | √                                       |                   | √                 | √              |
| 568.218                                                         | √                                       |                   | √                 | √              |
| 574.320                                                         | √                                       |                   | √                 | √              |
| 576.347                                                         | √                                       | √                 | √                 | √              |
| 582.268                                                         | √                                       |                   | √                 | √              |
| 587.353                                                         | √                                       |                   | √                 | √              |
| 589.357                                                         | √                                       | √                 | √                 | √              |
| 590.276                                                         | √                                       |                   | √                 | √              |
| 595.201                                                         | √                                       | √                 | √                 | √              |
| 603.367                                                         | √                                       |                   | √                 | √              |

| Detected metabolite<br>ion signals <sup>a)</sup> ( <i>m/z</i> ) | Atlantic salmon eyeball tissue sections |                   |                   |                |
|-----------------------------------------------------------------|-----------------------------------------|-------------------|-------------------|----------------|
|                                                                 | OCT-embedding                           | Agarose-embedding | Gelatin-embedding | PAAG-embedding |
| 605.384                                                         | √                                       |                   | √                 | √              |
| 613.353                                                         | √                                       | √                 | √                 | √              |
| 615.389                                                         | √                                       | √                 | √                 | √              |
| 617.403                                                         | √                                       | √                 | √                 | √              |
| 619.417                                                         | √                                       | √                 | √                 | √              |
| 622.371                                                         | √                                       |                   |                   | √              |
| 631.417                                                         |                                         | √                 |                   |                |
| 643.403                                                         | √                                       | √                 | √                 | √              |
| 645.425                                                         | √                                       | √                 | √                 | √              |
| 647.435                                                         | √                                       | √                 | √                 | √              |
| 649.429                                                         | √                                       | √                 | √                 | √              |
| 650.967                                                         |                                         | √                 |                   |                |
| 651.443                                                         | √                                       | √                 |                   | √              |
| 653.462                                                         |                                         | √                 |                   |                |
| 659.492                                                         | √                                       |                   | √                 | √              |
| 671.459                                                         | √                                       |                   | √                 | √              |
| 673.483                                                         | √                                       | √                 | √                 | √              |
| 675.973                                                         |                                         | √                 |                   |                |
| 677.468                                                         |                                         | √                 |                   |                |
| 686.465                                                         |                                         |                   |                   |                |
| 688.482                                                         |                                         |                   |                   |                |
| 693.447                                                         | √                                       |                   | √                 | √              |
| 698.507                                                         | √                                       |                   |                   | √              |
| 699.509                                                         | √                                       | √                 | √                 | √              |
| 700.529                                                         | √                                       |                   |                   | √              |
| 701.489                                                         | √                                       |                   | √                 | √              |
| 702.533                                                         | √                                       |                   |                   | √              |
| 714.503                                                         | √                                       |                   |                   | √              |
| 716.517                                                         | √                                       |                   | √                 | √              |
| 719.471                                                         | √                                       | √                 | √                 | √              |
| 721.476                                                         | √                                       |                   | √                 | √              |
| 724.509                                                         |                                         |                   |                   |                |
| 726.549                                                         | √                                       |                   |                   | √              |
| 728.560                                                         | √                                       |                   | √                 | √              |
| 731.515                                                         | √                                       |                   | √                 | √              |

| Detected metabolite<br>ion signals <sup>a)</sup> ( <i>m/z</i> ) | Atlantic salmon eyeball tissue sections |                   |                   |                |
|-----------------------------------------------------------------|-----------------------------------------|-------------------|-------------------|----------------|
|                                                                 | OCT-embedding                           | Agarose-embedding | Gelatin-embedding | PAAG-embedding |
| 736.488                                                         | √                                       |                   | √                 | √              |
| 738.495                                                         | √                                       |                   | √                 | √              |
| 740.474                                                         |                                         |                   |                   |                |
| 742.534                                                         | √                                       |                   | √                 | √              |
| 743.091                                                         |                                         | √                 |                   |                |
| 744.551                                                         | √                                       | √                 | √                 | √              |
| 745.482                                                         | √                                       | √                 | √                 | √              |
| 746.535                                                         | √                                       | √                 | √                 | √              |
| 747.526                                                         | √                                       | √                 | √                 | √              |
| 748.545                                                         | √                                       |                   | √                 | √              |
| 750.511                                                         | √                                       |                   | √                 | √              |
| 758.523                                                         | √                                       |                   | √                 | √              |
| 762.513                                                         | √                                       | √                 | √                 | √              |
| 764.540                                                         | √                                       |                   | √                 | √              |
| 766.542                                                         | √                                       | √                 | √                 | √              |
| 770.548                                                         | √                                       |                   | √                 | √              |
| 771.527                                                         |                                         | √                 |                   |                |
| 772.555                                                         | √                                       |                   | √                 | √              |
| 773.547                                                         | √                                       |                   | √                 | √              |
| 774.551                                                         | √                                       | √                 | √                 | √              |
| 775.543                                                         | √                                       |                   |                   | √              |
| 776.526                                                         | √                                       |                   | √                 | √              |
| 778.563                                                         | √                                       |                   | √                 | √              |
| 786.487                                                         | √                                       |                   | √                 | √              |
| 788.528                                                         | √                                       |                   | √                 | √              |
| 790.558                                                         | √                                       | √                 | √                 | √              |
| 792.552                                                         | √                                       | √                 |                   | √              |
| 797.679                                                         |                                         |                   |                   |                |
| 802.527                                                         |                                         | √                 | √                 |                |
| 804.543                                                         | √                                       | √                 | √                 | √              |
| 807.545                                                         | √                                       |                   |                   | √              |
| 808.543                                                         | √                                       |                   | √                 | √              |
| 809.562                                                         | √                                       |                   |                   | √              |
| 810.533                                                         | √                                       |                   | √                 | √              |
| 814.517                                                         | √                                       |                   | √                 | √              |

| Detected metabolite<br>ion signals <sup>a)</sup> ( <i>m/z</i> ) | Atlantic salmon eyeball tissue sections |                   |                   |                |
|-----------------------------------------------------------------|-----------------------------------------|-------------------|-------------------|----------------|
|                                                                 | OCT-embedding                           | Agarose-embedding | Gelatin-embedding | PAAG-embedding |
| 816.565                                                         | √                                       | √                 | √                 | √              |
| 818.579                                                         | √                                       | √                 | √                 | √              |
| 821.542                                                         | √                                       |                   |                   | √              |
| 822.558                                                         | √                                       |                   | √                 | √              |
| 828.533                                                         | √                                       |                   | √                 | √              |
| 832.544                                                         | √                                       |                   |                   | √              |
| 833.561                                                         | √                                       |                   | √                 | √              |
| 834.550                                                         | √                                       | √                 | √                 | √              |
| 835.585                                                         | √                                       |                   | √                 | √              |
| 836.538                                                         | √                                       | √                 | √                 | √              |
| 846.501                                                         | √                                       |                   | √                 | √              |
| 848.543                                                         | √                                       |                   | √                 | √              |
| 850.503                                                         |                                         |                   | √                 |                |
| 856.553                                                         | √                                       | √                 | √                 | √              |
| 857.562                                                         | √                                       | √                 | √                 | √              |
| 860.641                                                         | √                                       | √                 | √                 | √              |
| 862.603                                                         | √                                       | √                 | √                 | √              |
| 863.637                                                         | √                                       | √                 | √                 | √              |
| 876.570                                                         | √                                       | √                 | √                 | √              |
| 878.486                                                         | √                                       |                   | √                 | √              |
| 881.543                                                         | √                                       |                   |                   | √              |
| 883.569                                                         | √                                       | √                 | √                 | √              |
| 885.587                                                         | √                                       | √                 | √                 | √              |
| 888.679                                                         | √                                       |                   | √                 | √              |
| 892.493                                                         |                                         |                   | √                 |                |
| 894.519                                                         | √                                       |                   | √                 | √              |
| 900.502                                                         | √                                       | √                 | √                 | √              |
| 904.664                                                         | √                                       |                   |                   | √              |
| 909.556                                                         | √                                       |                   | √                 | √              |
| 935.490                                                         |                                         |                   | √                 |                |
| 937.524                                                         |                                         |                   | √                 |                |
| 939.564                                                         | √                                       |                   | √                 | √              |
| 941.581                                                         |                                         |                   |                   |                |
| 981.464                                                         |                                         |                   | √                 |                |
| 995.562                                                         |                                         |                   |                   |                |

| Detected metabolite<br>ion signals <sup>a)</sup> (m/z) | Atlantic salmon eyeball tissue sections |                   |                   |                |
|--------------------------------------------------------|-----------------------------------------|-------------------|-------------------|----------------|
|                                                        | OCT-embedding                           | Agarose-embedding | Gelatin-embedding | PAAG-embedding |
| 1002.597                                               |                                         |                   | √                 |                |
| 1023.555                                               | √                                       |                   | √                 | √              |
| 1025.595                                               |                                         |                   | √                 |                |
| 1069.512                                               | √                                       |                   | √                 | √              |
| 1071.506                                               | √                                       |                   | √                 | √              |
| 1084.501                                               | √                                       |                   |                   | √              |
| 1086.489                                               | √                                       |                   | √                 | √              |
| 1097.464                                               | √                                       |                   | √                 | √              |
| 1110.552                                               | √                                       |                   | √                 | √              |
| 1112.437                                               | √                                       |                   | √                 | √              |
| 1114.451                                               | √                                       |                   | √                 | √              |
| 1116.463                                               | √                                       |                   | √                 | √              |
| 1138.361                                               |                                         | √                 | √                 |                |
| 1140.398                                               | √                                       |                   |                   | √              |
| 1141.465                                               |                                         |                   | √                 |                |
| 1144.479                                               |                                         |                   | √                 |                |
| 1156.394                                               | √                                       |                   |                   | √              |
| 1157.443                                               |                                         |                   | √                 |                |
| 1158.388                                               | √                                       |                   |                   | √              |
| 1182.388                                               | √                                       |                   |                   | √              |
| 1184.333                                               | √                                       |                   | √                 | √              |
| 1218.291                                               | √                                       |                   |                   | √              |
| 1281.242                                               |                                         |                   | √                 |                |
| 1424.803                                               | √                                       |                   | √                 | √              |
| 1450.950                                               |                                         |                   | √                 |                |
| 1468.777                                               |                                         |                   | √                 |                |
| 1470.548                                               | √                                       |                   | √                 | √              |
| 1494.456                                               | √                                       |                   | √                 | √              |
| 1495.973                                               | √                                       |                   | √                 | √              |
| 1499.492                                               | √                                       |                   |                   | √              |
| 1516.134                                               | √                                       |                   |                   | √              |
| 1541.962                                               | √                                       |                   | √                 | √              |
| 1567.965                                               | √                                       |                   | √                 | √              |
| 1574.236                                               |                                         |                   | √                 |                |
| 1587.895                                               | √                                       |                   |                   | √              |

| Detected metabolite<br>ion signals <sup>a)</sup> ( <i>m/z</i> ) | Atlantic salmon eyeball tissue sections |                   |                   |                |
|-----------------------------------------------------------------|-----------------------------------------|-------------------|-------------------|----------------|
|                                                                 | OCT-embedding                           | Agarose-embedding | Gelatin-embedding | PAAG-embedding |
| 1614.106                                                        |                                         |                   | √                 |                |
| Total number of<br>detected compounds                           | 143                                     | 211               | 210               | 253            |

a) Detected metabolite ion signal data were duplicate values obtained from three parallel detection of each group (n=3×3).

**Table S6.** Metabolites detected and assigned in PAAG embedded Atlantic salmon eyeball tissue sections by (+)MALDI-TOF/TOF MS using 2-MBT as the matrix.

| No. | Measured<br><i>m/z</i> | Calculated<br><i>m/z</i> | Error<br> ppm | Assignment          |                                                |                                                                 | Structurally<br>specific CID<br>ions ( <i>m/z</i> ) <sup>a)</sup> |
|-----|------------------------|--------------------------|---------------|---------------------|------------------------------------------------|-----------------------------------------------------------------|-------------------------------------------------------------------|
|     |                        |                          |               | Ion form            | Compound                                       | Molecular<br>formula                                            |                                                                   |
| 1   | 104.345                | -                        | -             | -                   | -                                              | -                                                               |                                                                   |
| 2   | 132.182                | -                        | -             | -                   | -                                              | -                                                               |                                                                   |
| 3   | 136.104                | -                        | -             | -                   | -                                              | -                                                               |                                                                   |
| 4   | 147.038                | -                        | -             | -                   | -                                              | -                                                               |                                                                   |
| 5   | 156.107                | -                        | -             | -                   | -                                              | -                                                               |                                                                   |
| 6   | 166.066                | 166.0661                 | 1             | [M+Na] <sup>+</sup> | 2-Ethyl-2,5-dihydro-4,5-dimethylthiazole       | C <sub>7</sub> H <sub>13</sub> NS                               | 41, 56<br>75, 129                                                 |
| 7   | 166.977                | 166.9773                 | 2             | [M+K] <sup>+</sup>  | 2-Amino-5-chloropyridine                       | C <sub>5</sub> H <sub>5</sub> ClN <sub>2</sub>                  | 66, 85, 100,<br>129                                               |
| 8   | 167.993                | 167.9936                 | 4             | [M+H] <sup>+</sup>  | 2(3H)-Benzothiazolethione                      | C <sub>7</sub> H <sub>5</sub> NS <sub>2</sub>                   | 51, 109                                                           |
| 9   | 169.018                | 169.0174                 | 4             | [M+H] <sup>+</sup>  | Ethyl propyl trisulfide                        | C <sub>5</sub> H <sub>12</sub> S <sub>3</sub>                   | 45, 61                                                            |
| 10  | 170.008                | 170.0069                 | 7             | [M+Na] <sup>+</sup> | Ibervirin                                      | C <sub>5</sub> H <sub>9</sub> NS <sub>2</sub>                   | 41, 89                                                            |
| 11  | 184.057                | 184.0580                 | 6             | [M+Na] <sup>+</sup> | 3-Aminoadipic acid                             | C <sub>6</sub> H <sub>11</sub> NO <sub>4</sub>                  | 42, 70<br>63, 109                                                 |
| 12  | 189.979                | 189.9780                 | 5             | [M+K] <sup>+</sup>  | 1-(2-Chloroethyl)-1-nitrosourea                | C <sub>3</sub> H <sub>6</sub> ClN <sub>3</sub> O <sub>2</sub>   | 44, 63, 73                                                        |
| 13  | 191.972                | 191.9727                 | 4             | [M+K] <sup>+</sup>  | 3-Sulfinoalanine                               | C <sub>3</sub> H <sub>7</sub> NO <sub>4</sub> S                 | 42, 81, 108                                                       |
| 14  | 198.067                | 198.0680                 | 5             | [M+H] <sup>+</sup>  | Clephedrone                                    | C <sub>10</sub> H <sub>12</sub> ClNO                            | 51, 111, 164                                                      |
| 15  | 199.944                | 199.9431                 | 5             | [M+K] <sup>+</sup>  | Dichloroaniline                                | C <sub>6</sub> H <sub>5</sub> Cl <sub>2</sub> N                 | 39, 85, 162                                                       |
| 16  | 205.947                | -                        | -             | -                   | -                                              | -                                                               |                                                                   |
| 17  | 211.945                | -                        | -             | -                   | -                                              | -                                                               |                                                                   |
| 18  | 227.913                | -                        | -             | -                   | -                                              | -                                                               |                                                                   |
| 19  | 238.995                | 238.9952                 | 1             | [M+K] <sup>+</sup>  | Maleylacetoacetic acid                         | C <sub>8</sub> H <sub>8</sub> O <sub>6</sub>                    | 61, 71, 87, 99,<br>155                                            |
| 20  | 243.889                | -                        | -             | -                   | -                                              | -                                                               |                                                                   |
| 21  | 253.038                | 253.0374                 | 2             | [M+K] <sup>+</sup>  | 4-(4-Nitrobenzyl)pyridine                      | C <sub>12</sub> H <sub>10</sub> N <sub>2</sub> O <sub>2</sub>   | 84, 132, 211                                                      |
| 22  | 256.987                | 256.9856                 | 6             | [M+K] <sup>+</sup>  | Diphenyl disulfide                             | C <sub>12</sub> H <sub>10</sub> S <sub>2</sub>                  | 51, 83, 109,                                                      |
| 23  | 258.080                | 258.0795                 | 2             | [M+H] <sup>+</sup>  | 2-(Ethyl sulfonylmethyl)phenyl methylcarbamate | C <sub>11</sub> H <sub>15</sub> NO <sub>4</sub> S               | 58, 93, 155,<br>171                                               |
| 24  | 259.015                | 259.0149                 | 4             | [M+K] <sup>+</sup>  | N-Acetyl-S-(N-methylcarbamoyl)cysteine         | C <sub>7</sub> H <sub>12</sub> N <sub>2</sub> O <sub>4</sub> S  | 60, 84, 116                                                       |
| 25  | 269.003                | -                        | -             | -                   | -                                              | -                                                               |                                                                   |
| 26  | 270.010                | 270.0083                 | 6             | [M+K] <sup>+</sup>  | 2-Amino-5-chlorobenzophenone                   | C <sub>13</sub> H <sub>10</sub> ClNO                            | 51, 105, 154                                                      |
| 27  | 275.967                | -                        | -             | -                   | -                                              | -                                                               |                                                                   |
| 28  | 279.080                | 279.0798                 | 1             | [M+H] <sup>+</sup>  | 5-hydroxyindole thiazolidine carboxylate       | C <sub>13</sub> H <sub>14</sub> N <sub>2</sub> O <sub>3</sub> S | 132, 146, 173                                                     |



| No. | Measured<br><i>m/z</i> | Calculated<br><i>m/z</i> | Error<br> ppm | Assignment          |                                                                                               |                                                                                | Structurally<br>specific CID<br>ions ( <i>m/z</i> ) <sup>a)</sup> |
|-----|------------------------|--------------------------|---------------|---------------------|-----------------------------------------------------------------------------------------------|--------------------------------------------------------------------------------|-------------------------------------------------------------------|
|     |                        |                          |               | Ion form            | Compound                                                                                      | Molecular<br>formula                                                           |                                                                   |
| 29  | 280.079                | 280.0803                 | 3             | [M+K] <sup>+</sup>  | Tetrahydrobiopterin                                                                           | C <sub>9</sub> H <sub>15</sub> N <sub>5</sub> O <sub>3</sub>                   | 55, 124, 149,<br>166                                              |
| 30  | 290.997                | 290.9950                 | 7             | [M+Na] <sup>+</sup> | Dichlorophen                                                                                  | C <sub>13</sub> H <sub>10</sub> Cl <sub>2</sub> O <sub>2</sub>                 | 111, 141, 251                                                     |
| 31  | 296.063                | 296.0643                 | 4             | [M+K] <sup>+</sup>  | 2'-C-Methylcytidine                                                                           | C <sub>10</sub> H <sub>15</sub> N <sub>3</sub> O <sub>5</sub>                  | 95, 112, 130<br>47, 231                                           |
| 32  | 300.986                | 300.9866                 | 2             | [M+K] <sup>+</sup>  | Dehydro-4-<br>methoxycyclobassinin                                                            | C <sub>12</sub> H <sub>10</sub> N <sub>2</sub> OS <sub>2</sub>                 | 47, 127, 171,<br>231                                              |
| 33  | 302.996                | 302.9935                 | 8             | [M+K] <sup>+</sup>  | 3-Methoxy-4-<br>hydroxyphenylethyleneglycol<br>sulfate                                        | C <sub>9</sub> H <sub>12</sub> O <sub>7</sub> S                                | 51, 81, 137,<br>203                                               |
| 34  | 312.364                | -                        | -             | -                   | -                                                                                             | -                                                                              | -                                                                 |
| 35  | 322.976                | 322.9766                 | 2             | [M+K] <sup>+</sup>  | Sulfachlorpyridazine                                                                          | C <sub>10</sub> H <sub>9</sub> ClN <sub>4</sub> O <sub>2</sub> S               | 68, 88, 130                                                       |
| 36  | 332.962                | 332.9643                 | 7             | [M+H] <sup>+</sup>  | 2,2'-Dithiobisbenzothiazole                                                                   | C <sub>14</sub> H <sub>8</sub> N <sub>2</sub> S <sub>4</sub>                   | 51, 109                                                           |
| 37  | 334.004                | 334.0008                 | 10            | [M+Na] <sup>+</sup> | 3'-Hydroxydiclofenac                                                                          | C <sub>14</sub> H <sub>11</sub> Cl <sub>2</sub> NO <sub>3</sub>                | 77, 266                                                           |
| 38  | 334.980                | -                        | -             | -                   | -                                                                                             | -                                                                              | -                                                                 |
| 39  | 336.979                | 336.9808                 | 5             | [M+Na] <sup>+</sup> | Iodoantipyrene                                                                                | C <sub>11</sub> H <sub>11</sub> IN <sub>2</sub> O                              | 92, 120, 167,<br>196                                              |
| 40  | 346.995                | 346.9986                 | 10            | [M+K] <sup>+</sup>  | 2-Hydroxy-4-<br>methoxybenzophenone sulfate                                                   | C <sub>14</sub> H <sub>12</sub> O <sub>6</sub> S                               | 77, 105, 151,<br>283                                              |
| 41  | 354.981                | 354.9785                 | 7             | [M+H] <sup>+</sup>  | 5'-Iodoexoxyridine                                                                            | C <sub>9</sub> H <sub>11</sub> IN <sub>2</sub> O <sub>5</sub>                  | 42, 223                                                           |
| 42  | 356.982                | 356.9806                 | 4             | [M+K] <sup>+</sup>  | (2R,3R,4S,5R)-2-(5,6-<br>Dichlorobenzimidazol-1-yl)-5-<br>(hydroxymethyl)oxolane-3,4-<br>diol | C <sub>12</sub> H <sub>12</sub> Cl <sub>2</sub> N <sub>2</sub> O <sub>4</sub>  | 153, 187, 199                                                     |
| 43  | 364.941                | -                        | -             | -                   | -                                                                                             | -                                                                              | -                                                                 |
| 44  | 366.939                | -                        | -             | -                   | -                                                                                             | -                                                                              | -                                                                 |
| 45  | 370.943                | -                        | -             | -                   | -                                                                                             | -                                                                              | -                                                                 |
| 46  | 386.955                | 386.9571                 | 6             | [M+K] <sup>+</sup>  | Daidzein sulfate                                                                              | C <sub>15</sub> H <sub>8</sub> O <sub>8</sub> S                                | 316, 349                                                          |
| 47  | 390.047                | 390.0463-                | 2             | [M+Na] <sup>+</sup> | Lodoxamide ethyl                                                                              | C <sub>15</sub> H <sub>14</sub> ClN <sub>3</sub> O <sub>6</sub>                | 47, 168, 240,<br>368                                              |
| 48  | 392.066                | 392.0651                 | 2             | [M+Na] <sup>+</sup> | Lansoprazole                                                                                  | C <sub>16</sub> H <sub>14</sub> F <sub>3</sub> N <sub>3</sub> O <sub>2</sub> S | 184, 252<br>47, 359                                               |
| 49  | 396.910                | 396.9133                 | 8             | [M+K] <sup>+</sup>  | Triclabendazole                                                                               | C <sub>14</sub> H <sub>9</sub> Cl <sub>3</sub> N <sub>2</sub> OS               | 47, 85, 147,<br>213, 359                                          |
| 50  | 398.909                | -                        | -             | -                   | -                                                                                             | -                                                                              | -                                                                 |
| 51  | 400.402                | -                        | -             | -                   | -                                                                                             | -                                                                              | -                                                                 |
| 52  | 400.904                | -                        | -             | -                   | -                                                                                             | -                                                                              | -                                                                 |
| 53  | 404.043                | 404.0427                 | 1             | [M+Na] <sup>+</sup> | Dehydrofelodipine                                                                             | C <sub>18</sub> H <sub>17</sub> Cl <sub>2</sub> NO <sub>4</sub>                | 164, 250, 276,                                                    |
| 54  | 406.075                | 406.0720                 | 7             | [M+H] <sup>+</sup>  | Difenoconazole                                                                                | C <sub>19</sub> H <sub>17</sub> Cl <sub>2</sub> N <sub>3</sub> O <sub>3</sub>  | 141, 188, 223,<br>251                                             |

| No. | Measured<br><i>m/z</i> | Calculated<br><i>m/z</i> | Error<br> ppm | Assignment          |                                                                               |                                                                                | Structurally<br>specific CID<br>ions ( <i>m/z</i> ) <sup>a)</sup> |
|-----|------------------------|--------------------------|---------------|---------------------|-------------------------------------------------------------------------------|--------------------------------------------------------------------------------|-------------------------------------------------------------------|
|     |                        |                          |               | Ion form            | Compound                                                                      | Molecular<br>formula                                                           |                                                                   |
| 55  | 424.038                | 424.0400                 | 5             | [M+H] <sup>+</sup>  | Gluciberin                                                                    | C <sub>11</sub> H <sub>21</sub> NO <sub>10</sub> S <sub>3</sub>                | 261, 406, 424                                                     |
| 56  | 426.412                | -                        | -             | -                   | -                                                                             | -                                                                              |                                                                   |
| 57  | 428.455                | -                        | -             | -                   | -                                                                             | -                                                                              |                                                                   |
| 58  | 440.913                | -                        | -             | -                   | -                                                                             | -                                                                              |                                                                   |
| 59  | 442.889                | -                        | -             | -                   | -                                                                             | -                                                                              |                                                                   |
| 60  | 456.026                | -                        | -             | -                   | -                                                                             | -                                                                              |                                                                   |
| 61  | 466.022                | 466.0252                 | 7             | [M+K] <sup>+</sup>  | Cefpodoxime                                                                   | C <sub>15</sub> H <sub>17</sub> N <sub>5</sub> O <sub>6</sub> S <sub>2</sub>   | 56, 188, 243,<br>366                                              |
| 62  | 468.013                | -                        | -             | -                   | -                                                                             | -                                                                              |                                                                   |
| 63  | 468.420                | -                        | -             | -                   | -                                                                             | -                                                                              |                                                                   |
| 64  | 478.419                | -                        | -             | -                   | -                                                                             | -                                                                              |                                                                   |
| 65  | 482.415                | -                        | -             | -                   | -                                                                             | -                                                                              |                                                                   |
| 66  | 494.328                | 494.3241                 | 8             | [M+H] <sup>+</sup>  | LPC(16:1)                                                                     | C <sub>24</sub> H <sub>48</sub> NO <sub>7</sub> P                              | 104, 311, 441                                                     |
| 67  | 496.375                | 496.3761                 | 3             | [M+H] <sup>+</sup>  | LPC(O-17:0)                                                                   | C <sub>25</sub> H <sub>54</sub> NO <sub>6</sub> P                              | 480, 391, 168,<br>97                                              |
| 68  | 497.992                | 497.9951                 | 6             | [M+Na] <sup>+</sup> | 2',3'-Dideoxyadenosine-5-<br>triphosphate                                     | C <sub>10</sub> H <sub>16</sub> N <sub>5</sub> O <sub>11</sub> P <sub>3</sub>  | 81, 136, 218,<br>378                                              |
| 69  | 499.983                | -                        | -             | -                   | -                                                                             | -                                                                              |                                                                   |
| 70  | 504.435                | 504.4387                 | 7             | [M+Na] <sup>+</sup> | Cer(d30:1)                                                                    | C <sub>30</sub> H <sub>59</sub> NO <sub>3</sub>                                | 264, 282, 464                                                     |
| 71  | 508.482                | -                        | -             | -                   | -                                                                             | -                                                                              |                                                                   |
| 72  | 515.113                | 515.1165                 | 7             | [M+Na] <sup>+</sup> | Malvidin 3-glucoside                                                          | C <sub>23</sub> H <sub>25</sub> O <sub>12</sub>                                | 103, 163, 315,<br>331, 493                                        |
| 73  | 518.379                | 518.3816                 | 5             | [M+Na] <sup>+</sup> | N-Nervonoyl Glutamic acid                                                     | C <sub>29</sub> H <sub>53</sub> NO <sub>5</sub>                                | 43, 100, 123,<br>148, 360                                         |
| 74  | 522.396                | 522.3919                 | 8             | [M+K] <sup>+</sup>  | Docosanoylcarnitine                                                           | C <sub>29</sub> H <sub>57</sub> NO <sub>4</sub>                                | 71, 85, 425                                                       |
| 75  | 524.408                | 524.4075                 | 1             | [M+H] <sup>+</sup>  | Edelfosine                                                                    | C <sub>27</sub> H <sub>58</sub> NO <sub>6</sub> P                              | 88, 253, 341,<br>508                                              |
| 76  | 525.117                | 502.1271                 | 1             | [M+Na] <sup>+</sup> | Fluvalinate                                                                   | C <sub>26</sub> H <sub>22</sub> ClF <sub>3</sub> N <sub>2</sub> O <sub>3</sub> | 51, 132, 226,<br>278, 477                                         |
| 77  | 529.960                | 529.9640                 | 8             | [M+K] <sup>+</sup>  | Deoxyadenosine triphosphate                                                   | C <sub>10</sub> H <sub>16</sub> N <sub>5</sub> O <sub>12</sub> P <sub>3</sub>  | 94, 109, 136,<br>357                                              |
| 78  | 531.924                | -                        | -             | -                   | -                                                                             | -                                                                              |                                                                   |
| 79  | 534.360                | 534.3554                 | 9             | [M+H] <sup>+</sup>  | LPE(22:2)                                                                     | C <sub>27</sub> H <sub>52</sub> NO <sub>7</sub> P                              | 44, 151, 319,<br>377, 422                                         |
| 80  | 540.991                | -                        | -             | -                   | -                                                                             | -                                                                              |                                                                   |
| 81  | 544.380                | -                        | -             | -                   | -                                                                             | -                                                                              |                                                                   |
| 82  | 557.088                | 557.0902                 | 4             | [M+Na] <sup>+</sup> | 3,5-Dihydroxy-3',4'-dimethoxy-<br>6,7-methylenedioxyflavone 3-<br>glucuronide | C <sub>24</sub> H <sub>22</sub> O <sub>14</sub>                                | 87, 181, 343,<br>359, 505                                         |
| 83  | 561.911                | -                        | -             | -                   | -                                                                             | -                                                                              |                                                                   |

| No. | Measured<br><i>m/z</i> | Calculated<br><i>m/z</i> | Error<br> ppm | Assignment          |                                                                           |                                                                                | Structurally<br>specific CID<br>ions ( <i>m/z</i> ) <sup>a)</sup> |
|-----|------------------------|--------------------------|---------------|---------------------|---------------------------------------------------------------------------|--------------------------------------------------------------------------------|-------------------------------------------------------------------|
|     |                        |                          |               | Ion form            | Compound                                                                  | Molecular<br>formula                                                           |                                                                   |
| 84  | 568.374                | 568.3763                 | 4             | [M+K] <sup>+</sup>  | N-Nervonoyl Tyrosine                                                      | C <sub>33</sub> H <sub>55</sub> NO <sub>4</sub>                                | 83, 109, 136,<br>424                                              |
| 85  | 573.926                | -                        | -             | -                   | -                                                                         | -                                                                              | -                                                                 |
| 86  | 589.041                | 589.0442                 | 5             | [M+Na] <sup>+</sup> | Uridine diphosphate glucose                                               | C <sub>15</sub> H <sub>24</sub> N <sub>2</sub> O <sub>17</sub> P <sub>2</sub>  | 57, 113, 227,<br>387, 405                                         |
| 87  | 590.362                | 590.3582                 | 6             | [M+K] <sup>+</sup>  | LPC(20:0)                                                                 | C <sub>28</sub> H <sub>58</sub> NO <sub>7</sub> P                              | 59, 88, 197,<br>267, 295, 369                                     |
| 88  | 606.349                | 606.3471                 | 3             | [M+H] <sup>+</sup>  | Dynorphin B (6-9)                                                         | C <sub>26</sub> H <sub>43</sub> N <sub>11</sub> O <sub>6</sub>                 | 60, 101, 129,<br>285, 354, 533<br>86, 614                         |
| 89  | 614.266                | 614.2721                 | 10            | [M+H] <sup>+</sup>  | Ferrioxamine B                                                            | C <sub>25</sub> H <sub>45</sub> F <sub>6</sub> N <sub>6</sub> O <sub>8</sub>   | 41, 72, 86, 485,<br>541                                           |
| 90  | 615.253                | -                        | -             | -                   | -                                                                         | -                                                                              | -                                                                 |
| 91  | 616.275                | 616.2783                 | 5             | [M+K] <sup>+</sup>  | Aplaviroc                                                                 | C <sub>33</sub> H <sub>43</sub> N <sub>3</sub> O <sub>6</sub>                  | 57, 381, 578<br>118, 375, 579                                     |
| 92  | 617.329                | 617.3351                 | 10            | [M+K] <sup>+</sup>  | Deoxycholytryptophan                                                      | C <sub>35</sub> H <sub>50</sub> N <sub>2</sub> O <sub>5</sub>                  | 97, 118, 167,<br>375, 533, 579                                    |
| 93  | 630.278                | 630.2738                 | 7             | [M+K] <sup>+</sup>  | Fluphenazine decanoate                                                    | C <sub>32</sub> H <sub>44</sub> F <sub>3</sub> N <sub>3</sub> O <sub>2</sub> S | 81, 153, 213,<br>420, 590                                         |
| 94  | 631.265                | 631.2628                 | 3             | [M+K] <sup>+</sup>  | Hexobendine                                                               | C <sub>30</sub> H <sub>44</sub> N <sub>2</sub> O <sub>10</sub>                 | 86, 171, 255,<br>349, 593                                         |
| 95  | 632.270                | -                        | -             | -                   | -                                                                         | -                                                                              | -                                                                 |
| 96  | 638.259                | -                        | -             | -                   | -                                                                         | -                                                                              | -                                                                 |
| 97  | 639.247                | 639.2449                 | 3             | [M+H] <sup>+</sup>  | Hexyl heptanoate                                                          | C <sub>35</sub> H <sub>34</sub> N <sub>4</sub> O <sub>8</sub>                  | 63, 107, 120,<br>327, 533                                         |
| 98  | 646.279                | 646.2769                 | 3             | [M+Na] <sup>+</sup> | Leukotriene C5                                                            | C <sub>30</sub> H <sub>43</sub> N <sub>3</sub> O <sub>9</sub> S                | 56, 177, 333,<br>475, 560                                         |
| 99  | 648.260                | 648.2583                 | 3             | [M+K] <sup>+</sup>  | Ergocristine                                                              | C <sub>35</sub> H <sub>39</sub> N <sub>5</sub> O <sub>5</sub>                  | 70, 98, 166,<br>223, 334                                          |
| 100 | 655.066                | -                        | -             | -                   | -                                                                         | -                                                                              | -                                                                 |
| 101 | 675.524                | 675.5194                 | 7             | [M+H] <sup>+</sup>  | DG(18:0/PGJ2)                                                             | C <sub>41</sub> H <sub>70</sub> O <sub>7</sub>                                 | 307, 357, 363,<br>413, 697                                        |
| 102 | 676.593                | -                        | -             | -                   | -                                                                         | -                                                                              | -                                                                 |
| 103 | 678.615                | -                        | -             | -                   | -                                                                         | -                                                                              | -                                                                 |
| 104 | 683.972                | -                        | -             | -                   | -                                                                         | -                                                                              | -                                                                 |
| 105 | 697.504                | 697.5014                 | 4             | [M+Na] <sup>+</sup> | DG(18:0/PGJ2)                                                             | C <sub>41</sub> H <sub>70</sub> O <sub>7</sub>                                 | 307, 357, 363,<br>413, 698                                        |
| 106 | 698.561                | 698.5565                 | 6             | [M+H] <sup>+</sup>  | N-[(4E,8Z)-1,3-dihydroxyoctadeca-4,8-dien-2-yl]hexadecanamide 1-glucoside | C <sub>40</sub> H <sub>75</sub> NO <sub>8</sub>                                | 43, 127, 211,<br>440, 518, 663                                    |

| No. | Measured<br><i>m/z</i> | Calculated<br><i>m/z</i> | Error<br> ppm | Assignment          |                                |                                                   | Structurally<br>specific CID<br>ions ( <i>m/z</i> ) <sup>a)</sup> |
|-----|------------------------|--------------------------|---------------|---------------------|--------------------------------|---------------------------------------------------|-------------------------------------------------------------------|
|     |                        |                          |               | Ion form            | Compound                       | Molecular<br>formula                              |                                                                   |
| 107 | 700.601                | -                        | -             | -                   | -                              | -                                                 |                                                                   |
| 108 | 704.623                | -                        | -             | -                   | -                              | -                                                 |                                                                   |
| 109 | 706.644                | -                        | -             | -                   | -                              | -                                                 |                                                                   |
| 110 | 711.924                | -                        | -             | -                   | -                              | -                                                 |                                                                   |
| 111 | 714.558                | 714.5515                 | 9             | [M+H] <sup>+</sup>  | Soyacerebroside I              | C <sub>40</sub> H <sub>75</sub> NO <sub>9</sub>   | 43, 163, 278,<br>458, 656                                         |
| 112 | 716.587                | -                        | -             | -                   | -                              | -                                                 |                                                                   |
| 113 | 718.630                | -                        | -             | -                   | -                              | -                                                 |                                                                   |
| 114 | 724.579                | 724.5850                 | 8             | [M+Na] <sup>+</sup> | Arachidyl amido cholanoic acid | C <sub>44</sub> H <sub>79</sub> NO <sub>5</sub>   | 41, 93, 295,<br>434, 518, 703                                     |
| 115 | 726.612                | -                        | -             | -                   | -                              | -                                                 |                                                                   |
| 116 | 728.620                | -                        | -             | -                   | -                              | -                                                 |                                                                   |
| 117 | 730.580                | 730.5745                 | 8             | [M+H] <sup>+</sup>  | PE(P-36:1)                     | C <sub>41</sub> H <sub>80</sub> NO <sub>7</sub> P | 44, 307, 688<br>44, 142, 267,<br>307, 421, 575                    |
| 118 | 732.625                | -                        | -             | -                   | -                              | -                                                 |                                                                   |
| 119 | 739.998                | -                        | -             | -                   | -                              | -                                                 |                                                                   |
| 120 | 742.568                | 742.5745                 | 9             | [M+H] <sup>+</sup>  | PC(O-34:3)                     | C <sub>42</sub> H <sub>80</sub> NO <sub>7</sub> P | 279, 375, 464,<br>655, 715<br>88, 249, 323,                       |
| 121 | 744.592                | 744.5902                 | 2             | [M+H] <sup>+</sup>  | PC(P-34:1)                     | C <sub>42</sub> H <sub>82</sub> NO <sub>7</sub> P | 490, 550, 630,<br>701<br>285, 395, 408,                           |
| 122 | 746.575                | 746.5694                 | 7             | [M+H] <sup>+</sup>  | PE(36:1)                       | C <sub>41</sub> H <sub>80</sub> NO <sub>8</sub> P | 426, 536, 605,<br>728<br>55, 95, 265,<br>365, 617                 |
| 123 | 752.588                | 752.5928                 | 6             | [M+Na] <sup>+</sup> | CerP(d42:1)                    | C <sub>42</sub> H <sub>84</sub> NO <sub>6</sub> P | 88, 249, 572                                                      |
| 124 | 754.618                | 754.6109                 | 9             | [M+H] <sup>+</sup>  | PC(P-36:2)                     | C <sub>44</sub> H <sub>84</sub> NO <sub>6</sub> P | 88, 249, 307,<br>490, 570, 683                                    |
| 125 | 756.574                | -                        | -             | -                   | -                              | -                                                 |                                                                   |
| 126 | 758.574                | 758.5694                 | -             | [M+H] <sup>+</sup>  | PC(34:2)                       | C <sub>42</sub> H <sub>80</sub> NO <sub>8</sub> P | 86, 699                                                           |
| 127 | 760.583                | 760.5851                 | 3             | [M+H] <sup>+</sup>  | PC(34:1)                       | C <sub>42</sub> H <sub>82</sub> NO <sub>8</sub> P | 86, 577, 761                                                      |
| 128 | 766.570                | 766.5721                 | 3             | [M+Na] <sup>+</sup> | PC(P-34:1)                     | C <sub>42</sub> H <sub>82</sub> NO <sub>7</sub> P | 88, 249, 480,<br>658, 701                                         |
| 129 | 768.588                | 768.5878                 | 0             | [M+Na] <sup>+</sup> | PC(O-34:1)                     | C <sub>42</sub> H <sub>84</sub> NO <sub>7</sub> P | 88, 184, 267,<br>297, 550, 689                                    |
| 130 | 770.598                | 770.6034                 | 7             | [M+Na] <sup>+</sup> | PC(O-34:0)                     | C <sub>42</sub> H <sub>86</sub> NO <sub>7</sub> P | 72, , 299, 691                                                    |
| 131 | 772.616                | 772.6215                 | 7             | [M+H] <sup>+</sup>  | PC(P-36:1)                     | C <sub>44</sub> H <sub>86</sub> NO <sub>7</sub> P | 88, 590                                                           |

| No. | Measured<br><i>m/z</i> | Calculated<br><i>m/z</i> | Error<br> ppm | Assignment          |                                                                  |                                                              | Structurally<br>specific CID<br>ions ( <i>m/z</i> ) <sup>a)</sup> |
|-----|------------------------|--------------------------|---------------|---------------------|------------------------------------------------------------------|--------------------------------------------------------------|-------------------------------------------------------------------|
|     |                        |                          |               | Ion form            | Compound                                                         | Molecular<br>formula                                         |                                                                   |
|     |                        |                          |               |                     |                                                                  |                                                              | 88, 249, 403,<br>506, 590, 755                                    |
| 132 | 774.620                | -                        | -             | -                   | -                                                                | -                                                            | 88, 291, 741                                                      |
| 133 | 780.547                | 780.5514                 | 6             | [M+Na] <sup>+</sup> | PC(34:2)                                                         | C <sub>42</sub> H <sub>80</sub> NO <sub>8</sub> P            | 88, 169, 291,<br>365, 566, 715                                    |
| 134 | 782.596                | 782.6034                 | 7             | [M+Na] <sup>+</sup> | PE(P-38:0)                                                       | C <sub>43</sub> H <sub>86</sub> NO <sub>7</sub> P            | 79, 311, 603                                                      |
| 135 | 786.618                | 786.6233                 | 7             | [M+K] <sup>+</sup>  | Tetrac                                                           | C <sub>14</sub> H <sub>8</sub> L <sub>4</sub> O <sub>4</sub> | 371, 577                                                          |
| 136 | 788.635                | -                        | -             | -                   | -                                                                | -                                                            | 44, 734                                                           |
| 137 | 792.573                | 792.5668                 | 2             | [M+H] <sup>+</sup>  | PS(36:0)                                                         | C <sub>42</sub> H <sub>82</sub> NO <sub>10</sub> P           | 192, 490, 608,<br>712,                                            |
| 138 | 794.608                | 794.6058                 | 3             | [M+H] <sup>+</sup>  | PC(P-38:4)                                                       | C <sub>46</sub> H <sub>84</sub> NO <sub>7</sub> P            | 79, 237, 305,<br>441, 689                                         |
| 139 | 798.582                | 798.5773                 | 6             | [M+K] <sup>+</sup>  | PE(P-38:0)                                                       | C <sub>43</sub> H <sub>86</sub> NO <sub>7</sub> P            | 42, 703                                                           |
| 140 | 804.382                | -                        | -             | -                   | -                                                                | -                                                            |                                                                   |
| 141 | 806.538                | 806.5330                 | -             | [M+H] <sup>+</sup>  | PE(40:7)                                                         | C <sub>45</sub> H <sub>76</sub> NO <sub>9</sub> P            | 164, 471, 479                                                     |
| 142 | 808.581                | 808.5827                 | 1             | [M+Na] <sup>+</sup> | PC(36:2)                                                         | C <sub>44</sub> H <sub>84</sub> NO <sub>8</sub> P            | 147, 467, 526,<br>544, 626, 750                                   |
| 143 | 810.627                | 810.6347                 | 9             | [M+Na] <sup>+</sup> | PE(P-40:0)                                                       | C <sub>45</sub> H <sub>90</sub> NO <sub>7</sub> P            | 44, 381, 634                                                      |
| 144 | 813.667                | 813.6603                 | 8             | [M+H] <sup>+</sup>  | Isofucosterol 3-O-[6-O-<br>Hexadecanoyl-b-D-<br>glucopyranoside] | C <sub>51</sub> H <sub>88</sub> O <sub>7</sub>               | 97, 147, 239,<br>413, 657, 714                                    |
| 145 | 818.537                | 818.5330                 | 5             | [M+H] <sup>+</sup>  | PC(38:8)                                                         | C <sub>46</sub> H <sub>76</sub> NO <sub>9</sub> P            | 86, 104, 125,<br>184, 500, 558,<br>635                            |
| 146 | 824.592                | 824.5930                 | 1             | [M+K] <sup>+</sup>  | PE(P-40:1)                                                       | C <sub>45</sub> H <sub>88</sub> NO <sub>7</sub> P            | 44, 57, 142,<br>198, 309, 466                                     |
| 147 | 826.646                | -                        | -             | -                   | -                                                                | -                                                            |                                                                   |
| 148 | 828.542                | 828.5445                 | 3             | [M+Na] <sup>+</sup> | LacCer(d30:1)                                                    | C <sub>42</sub> H <sub>79</sub> NO <sub>13</sub>             | 264, 447, 807<br>88, 249, 610                                     |
| 149 | 830.540                | 830.5460                 | 7             | [M+K] <sup>+</sup>  | PC(P-38:5)                                                       | C <sub>46</sub> H <sub>82</sub> NO <sub>7</sub> P            | 88, 249, 323,<br>490, 596, 692,<br>749                            |
| 150 | 832.565                | 832.5617                 | 4             | [M+K] <sup>+</sup>  | PC(P-38:4)                                                       | C <sub>46</sub> H <sub>84</sub> NO <sub>7</sub> P            | 86, 104,<br>124, 184, 267<br>351, 672                             |
| 151 | 834.555                | 834.5619                 | 8             | [M+Na] <sup>+</sup> | PE(40:4-OH)                                                      | C <sub>45</sub> H <sub>82</sub> NO <sub>9</sub> P            | 351, 492, 672,<br>795, 813                                        |
| 152 | 835.626                | 835.6212                 | 6             | [M+K] <sup>+</sup>  | TG(48:5)                                                         | C <sub>51</sub> H <sub>88</sub> O <sub>6</sub>               | 309, 804                                                          |

| No. | Measured<br><i>m/z</i> | Calculated<br><i>m/z</i> | Error<br> ppm | Assignment          |                             |                                                                | Structurally<br>specific CID<br>ions ( <i>m/z</i> ) <sup>a)</sup> |
|-----|------------------------|--------------------------|---------------|---------------------|-----------------------------|----------------------------------------------------------------|-------------------------------------------------------------------|
|     |                        |                          |               | Ion form            | Compound                    | Molecular<br>formula                                           |                                                                   |
| 153 | 842.549                | 842.5542                 | 6             | [M+H] <sup>+</sup>  | PE(40:5-3OH)                | C <sub>45</sub> H <sub>80</sub> NO <sub>11</sub> P             | 367, 490, 550,<br>702, 825                                        |
| 154 | 844.514                | 844.5123                 | 2             | [M+H] <sup>+</sup>  | PE(42:10)                   | C <sub>47</sub> H <sub>74</sub> NO <sub>10</sub> P             | 164, 463, 519,<br>725, 823, 866                                   |
| 155 | 846.542                | 846.5410                 | 1             | [M+K] <sup>+</sup>  | PC(38:5)                    | C <sub>46</sub> H <sub>82</sub> NO <sub>8</sub> P              | 86, 104, 125,<br>184, 478, 496,<br>570, 626, 750                  |
| 156 | 854.568                | 854.5670                 | 1             | [M+Na] <sup>+</sup> | PC(40:7)                    | C <sub>48</sub> H <sub>82</sub> NO <sub>8</sub> P              | 88, 219, 323,<br>506, 650, 760                                    |
| 157 | 856.520                | 856.5253                 | 6             | [M+K] <sup>+</sup>  | PE(42:7)                    | C <sub>47</sub> H <sub>80</sub> NO <sub>8</sub> P              | 367, 385, 508,<br>526, 678, 801                                   |
| 158 | 863.558                | 863.5563                 | 2             | [M+K] <sup>+</sup>  | PA(44:4)                    | C <sub>47</sub> H <sub>85</sub> O <sub>9</sub> P               | 479, 497, 527,<br>545, 727, 710                                   |
| 159 | 872.571                | -                        | -             | -                   | -                           | -                                                              | -                                                                 |
| 160 | 878.427                | 878.4285                 | 2             | [M+K] <sup>+</sup>  | Ala-Thr-Trp-Leu-Pro-Pro-Arg | C <sub>40</sub> H <sub>61</sub> N <sub>11</sub> O <sub>9</sub> | 44, 74, 130,<br>260, 265, 373,<br>567, 624                        |
| 161 | 925.515                | 925.5203                 | 6             | [M+K] <sup>+</sup>  | PI(38:4)                    | C <sub>47</sub> H <sub>83</sub> O <sub>13</sub> P              | 41,165, 211,<br>297, 409, 627,<br>717, 869                        |
| 162 | 927.482                | 927.4841                 | 2             | [M+Na] <sup>+</sup> | PI(40:9)                    | C <sub>45</sub> H <sub>77</sub> O <sub>16</sub> P              | 97, 223, 315,<br>413, 481, 593,<br>643, 904                       |
| 163 | 947.988                | -                        | -             | -                   | -                           | -                                                              | -                                                                 |
| 164 | 973.418                | 973.4251                 | 7             | [M+Na] <sup>+</sup> | Rebaudioside C              | C <sub>44</sub> H <sub>70</sub> O <sub>22</sub>                | 87, 147, 317,<br>481, 641, 771,<br>933                            |
| 165 | 1231.072               | -                        | -             | -                   | -                           | -                                                              | -                                                                 |
| 166 | 1279.668               | -                        | -             | -                   | -                           | -                                                              | -                                                                 |
| 167 | 1281.670               | -                        | -             | -                   | -                           | -                                                              | -                                                                 |
| 168 | 1347.332               | -                        | -             | -                   | -                           | -                                                              | -                                                                 |
| 169 | 1373.335               | -                        | -             | -                   | -                           | -                                                              | -                                                                 |
| 170 | 1375.430               | -                        | -             | -                   | -                           | -                                                              | -                                                                 |
| 171 | 1396.208               | -                        | -             | -                   | -                           | -                                                              | -                                                                 |
| 172 | 1402.442               | -                        | -             | -                   | -                           | -                                                              | -                                                                 |
| 173 | 1409.663               | -                        | -             | -                   | -                           | -                                                              | -                                                                 |
| 174 | 1421.390               | -                        | -             | -                   | -                           | -                                                              | -                                                                 |
| 175 | 1433.733               | -                        | -             | -                   | -                           | -                                                              | -                                                                 |

| No. | Measured<br><i>m/z</i> | Calculated<br><i>m/z</i> | Error<br> ppm | Assignment          |                          |                                                                 | Structurally<br>specific CID<br>ions ( <i>m/z</i> ) <sup>a)</sup>                |
|-----|------------------------|--------------------------|---------------|---------------------|--------------------------|-----------------------------------------------------------------|----------------------------------------------------------------------------------|
|     |                        |                          |               | Ion form            | Compound                 | Molecular<br>formula                                            |                                                                                  |
| 176 | 1435.665               | 1435.6587                | 4             | [M+H] <sup>+</sup>  | Capsicoside E            | C <sub>64</sub> H <sub>106</sub> O <sub>35</sub>                | 163, 325, 487,<br>625, 947, 1110,<br>1256, 1418<br>57, 142, 221,                 |
| 177 | 1437.873               | 1437.8832                | 7             | [M+Na] <sup>+</sup> | Ganglioside GM2 (d40:2)  | C <sub>72</sub> H <sub>128</sub> N <sub>2</sub> O <sub>26</sub> | 364, 438, 587,<br>1116, 1438                                                     |
| 178 | 1457.688               | -                        | -             | -                   | -                        | -                                                               |                                                                                  |
| 179 | 1461.148               | -                        | -             | -                   | -                        | -                                                               |                                                                                  |
| 180 | 1463.820               | 1463.8104                | 6             | [M+H] <sup>+</sup>  | Ganglioside GM1 (d30: 0) | C <sub>68</sub> H <sub>122</sub> N <sub>2</sub> O <sub>31</sub> | 45, 95, 163,<br>309, 438, 656,<br>1265, 1464                                     |
| 181 | 1465.895               | -                        | -             | -                   | -                        | -                                                               |                                                                                  |
| 182 | 1491.854               | 1491.8417                | 8             | [M+H] <sup>+</sup>  | Ganglioside GM1 (d32:0)  | C <sub>70</sub> H <sub>126</sub> N <sub>2</sub> O <sub>31</sub> | 57, 163, 383,<br>478, 762, 998,<br>1265, 1402                                    |
| 183 | 1513.777               | -                        | -             | -                   | -                        | -                                                               |                                                                                  |
| 184 | 1515.816               | -                        | -             | -                   | -                        | -                                                               |                                                                                  |
| 185 | 1517.757               | -                        | -             | -                   | -                        | -                                                               |                                                                                  |
| 186 | 1519.876               | 1519.8730                | 2             | [M+H] <sup>+</sup>  | Ganglioside GM1 (d34:0)  | C <sub>72</sub> H <sub>130</sub> N <sub>2</sub> O <sub>31</sub> | 81, 163, 383,<br>438, 656, 762,<br>1280<br>165, 282, 366,                        |
| 187 | 1540.835               | 1540.8346                | 0             | [M+Na] <sup>+</sup> | Ganglioside GM1 (34:1)   | C <sub>71</sub> H <sub>127</sub> N <sub>3</sub> O <sub>31</sub> | 438, 506, 657,<br>999, 1518<br>95, 163, 282,                                     |
| 188 | 1546.881               | 1546.8839                | 2             | [M+H] <sup>+</sup>  | Ganglioside GM1 (36:1)   | C <sub>73</sub> H <sub>131</sub> N <sub>3</sub> O <sub>31</sub> | 438, 657, 1388,<br>1547                                                          |
| 189 | 1562.233               | -                        | -             | -                   | -                        | -                                                               |                                                                                  |
| 190 | 1565.841               | 1565.8550                | 9             | [M+Na] <sup>+</sup> | Ganglioside GM1 (36:2)   | C <sub>74</sub> H <sub>130</sub> N <sub>2</sub> O <sub>31</sub> | 81, 138, 163,<br>438, 530, 656,<br>762, 1454<br>265, 385, 539,<br>672, 828, 988, |
| 191 | 1571.983               | 1571.9952                | 8             | [M+H] <sup>+</sup>  | CL(82:17)                | C <sub>91</sub> H <sub>144</sub> O <sub>17</sub> P <sub>2</sub> | 1230, 1308,<br>1554                                                              |
| 192 | 1586.826               | -                        | -             | -                   | -                        | -                                                               |                                                                                  |
| 193 | 1592.098               | -                        | -             | -                   | -                        | -                                                               |                                                                                  |
| 194 | 1615.614               | -                        | -             | -                   | -                        | -                                                               |                                                                                  |
| 195 | 1637.710               | -                        | -             | -                   | -                        | -                                                               |                                                                                  |

a) Structurally specific CID ions of extracted compounds were detected by LC-MS/MS and/or MALD-TOF/TOF MS/MS using CID.

Red fragment ions were detected by LC-MS/MS, and blue fragment ions were detected by MALD-TOF/TOF MS/MS.

**Table S7.** Metabolites detected and assigned in PAAG embedded Atlantic salmon eyeball tissue sections by (–)MALDI-TOF/TOF MS using MEK as the matrix.

| No. | Measured<br><i>m/z</i> | Calculated<br><i>m/z</i> | Error<br> ppm | Assignment         |                                                      |                                                              | Structurally<br>specific CID<br>ions ( <i>m/z</i> ) <sup>a)</sup> |
|-----|------------------------|--------------------------|---------------|--------------------|------------------------------------------------------|--------------------------------------------------------------|-------------------------------------------------------------------|
|     |                        |                          |               | Ion form           | Compound                                             | Molecular formula                                            |                                                                   |
| 1   | 111.027                | -                        | -             | -                  | -                                                    | -                                                            |                                                                   |
| 2   | 113.024                | 113.0244                 | 4             | [M-H] <sup>-</sup> | cis-Acetylacrylate                                   | C <sub>5</sub> H <sub>6</sub> O <sub>3</sub>                 | 43, 51, 69                                                        |
| 3   | 119.981                | -                        | -             | -                  | -                                                    | -                                                            |                                                                   |
| 4   | 122.019                | -                        | -             | -                  | -                                                    | -                                                            |                                                                   |
| 5   | 123.022                | -                        | -             | -                  | -                                                    | -                                                            |                                                                   |
| 6   | 124.041                | 124.0404                 | 5             | [M-H] <sup>-</sup> | 5-(Hydroxymethyl)-1H-pyrrole-2-carbaldehyde          | C <sub>6</sub> H <sub>7</sub> NO <sub>2</sub>                | 66, 124<br>66, 92, 124                                            |
| 7   | 125.044                | -                        | -             | -                  | -                                                    | -                                                            |                                                                   |
| 8   | 132.076                | -                        | -             | -                  | -                                                    | -                                                            |                                                                   |
| 9   | 132.910                | -                        | -             | -                  | -                                                    | -                                                            |                                                                   |
| 10  | 134.058                | -                        | -             | -                  | -                                                    | -                                                            |                                                                   |
| 11  | 135.045                | 135.0452                 | 1             | [M-H] <sup>-</sup> | M-toluic Acid                                        | C <sub>8</sub> H <sub>8</sub> O <sub>2</sub>                 | 65, 91, 135                                                       |
| 12  | 138.057                | 138.0561                 | 7             | [M-H] <sup>-</sup> | 3,4-Dihydroxybenzylamine                             | C <sub>7</sub> H <sub>9</sub> NO <sub>2</sub>                | 41, 51, 66                                                        |
| 13  | 140.047                | 140.0466                 | 3             | [M-H] <sup>-</sup> | Dimetridazole                                        | C <sub>5</sub> H <sub>7</sub> N <sub>3</sub> O <sub>2</sub>  | 42, 73, 99, 130                                                   |
| 14  | 145.109                | -                        | -             | -                  | -                                                    | -                                                            |                                                                   |
| 15  | 146.097                | 146.0975                 | 3             | [M-H] <sup>-</sup> | 1,2,3,4-Tetrahydro-2-naphthylamine                   | C <sub>10</sub> H <sub>13</sub> N                            | 77, 91, 129                                                       |
| 16  | 147.006                | -                        | -             | -                  | -                                                    | -                                                            |                                                                   |
| 17  | 148.126                | -                        | -             | -                  | -                                                    | -                                                            |                                                                   |
| 18  | 150.071                | -                        | -             | -                  | -                                                    | -                                                            |                                                                   |
| 19  | 152.049                | 152.0484                 | 4             | [M-H] <sup>-</sup> | (2E)-4-hydroxy-5-methyl-2-propylidene-3(2H)-furanone | C <sub>8</sub> H <sub>9</sub> O <sub>3</sub>                 | 55, 135, 137                                                      |
| 20  | 153.049                | -                        | -             | -                  | -                                                    | -                                                            |                                                                   |
| 21  | 154.081                | -                        | -             | -                  | -                                                    | -                                                            |                                                                   |
| 22  | 158.048                | 158.0472                 | 5             | [M-H] <sup>-</sup> | 1,N6-Ethnoadenine                                    | C <sub>7</sub> H <sub>5</sub> N <sub>5</sub>                 | 89, 131, 158                                                      |
| 23  | 159.060                | -                        | -             | -                  | -                                                    | -                                                            |                                                                   |
| 24  | 166.025                | -                        | -             | -                  | -                                                    | -                                                            |                                                                   |
| 25  | 168.042                | 168.0431                 | 7             | [M-H] <sup>-</sup> | Phosphodimethylethanolamine                          | C <sub>4</sub> H <sub>12</sub> NO <sub>4</sub> P             | 63, 79, 97                                                        |
| 26  | 174.092                | 174.0924                 | 3             | [M-H] <sup>-</sup> | Dimethylaminocinnamaldehyde                          | C <sub>11</sub> H <sub>13</sub> NO                           | 44, 91, 132                                                       |
| 27  | 179.066                | 179.0648                 | 6             | [M-H] <sup>-</sup> | Protionamide                                         | C <sub>7</sub> H <sub>14</sub> FO <sub>2</sub> P             | 33, 58, 120                                                       |
| 28  | 180.073                | -                        | -             | -                  | -                                                    | -                                                            |                                                                   |
| 29  | 182.006                | 182.0046                 | 8             | [M-H] <sup>-</sup> | Acephate                                             | C <sub>4</sub> H <sub>10</sub> NO <sub>3</sub> PS            | 46, 94, 131                                                       |
| 30  | 184.017                | -                        | -             | -                  | -                                                    | -                                                            |                                                                   |
| 31  | 191.057                | -                        | -             | -                  | -                                                    | -                                                            |                                                                   |
| 32  | 192.125                | 192.1255                 | 2             | [M-H] <sup>-</sup> | Alvamine                                             | C <sub>9</sub> H <sub>15</sub> N <sub>5</sub>                | 40, 92, 121                                                       |
| 33  | 193.035                | 193.0354                 | 2             | [M-H] <sup>-</sup> | 3-Dehydro-L-gulonate                                 | C <sub>6</sub> H <sub>10</sub> O <sub>7</sub>                | 57, 59, 87, 117                                                   |
| 34  | 196.071                | 196.0728                 | 9             | [M-H] <sup>-</sup> | N-Acetylhistidine                                    | C <sub>8</sub> H <sub>11</sub> N <sub>3</sub> O <sub>3</sub> | 42, 67, 84, 108                                                   |
| 35  | 198.023                | -                        | -             | -                  | -                                                    | -                                                            |                                                                   |
| 36  | 207.088                | 207.0874                 | 3             | [M-H] <sup>-</sup> | Ethyl beta-D-glucopyranoside                         | C <sub>8</sub> H <sub>16</sub> O <sub>6</sub>                | 43, 59, 89, 135                                                   |



| No. | Measured<br><i>m/z</i> | Calculated<br><i>m/z</i> | Error<br> ppm | Assignment         |                                                              |                                                                             | Structurally<br>specific CID<br>ions ( <i>m/z</i> ) <sup>a)</sup> |
|-----|------------------------|--------------------------|---------------|--------------------|--------------------------------------------------------------|-----------------------------------------------------------------------------|-------------------------------------------------------------------|
|     |                        |                          |               | Ion form           | Compound                                                     | Molecular formula                                                           |                                                                   |
| 37  | 209.006                | -                        | -             | -                  | -                                                            | -                                                                           |                                                                   |
| 38  | 211.039                | 211.0401                 | 5             | [M-H] <sup>-</sup> | Urolithin B                                                  | C <sub>13</sub> H <sub>8</sub> O <sub>3</sub>                               | 141, 169, 183                                                     |
| 39  | 212.055                | 212.0564                 | 7             | [M-H] <sup>-</sup> | Droxidopa                                                    | C <sub>9</sub> H <sub>11</sub> NO <sub>5</sub>                              | 56, 72, 109,<br>151                                               |
| 40  | 213.074                | -                        | -             | -                  | -                                                            | -                                                                           |                                                                   |
| 41  | 223.082                | 223.0837                 | 7             | [M-H] <sup>-</sup> | Temurin                                                      | C <sub>9</sub> H <sub>12</sub> N <sub>4</sub> O <sub>3</sub>                | 56, 109, 166                                                      |
| 42  | 224.098                | -                        | -             | -                  | -                                                            | -                                                                           |                                                                   |
| 43  | 236.051                | 236.0533                 | 10            | [M-H] <sup>-</sup> | Mergepta                                                     | C <sub>7</sub> H <sub>15</sub> N <sub>3</sub> O <sub>2</sub> S <sub>2</sub> | 32, 74, 101                                                       |
| 44  | 249.069                | 249.0703                 | 5             | [M-H] <sup>-</sup> | Dansylamide                                                  | C <sub>12</sub> H <sub>14</sub> N <sub>2</sub> O <sub>2</sub> S             | 79, 154, 206<br>44, 206                                           |
| 45  | 251.089                | 251.0885                 | 2             | [M-H] <sup>-</sup> | Cycasin                                                      | C <sub>8</sub> H <sub>16</sub> N <sub>2</sub> O <sub>7</sub>                | 44, 86, 116,<br>206                                               |
| 46  | 252.124                | 252.1241                 | 1             | [M-H] <sup>-</sup> | L-DOPA n-Butyl Ester                                         | C <sub>13</sub> H <sub>19</sub> NO <sub>4</sub>                             | 72, 123, 179                                                      |
| 47  | 253.194                | 253.1962                 | 9             | [M-H] <sup>-</sup> | 18-Nor-4(19),8,11,13-abietatetraene                          | C <sub>19</sub> H <sub>26</sub>                                             | 39, 117, 185,<br>237                                              |
| 48  | 255.211                | -                        | -             | -                  | -                                                            | -                                                                           |                                                                   |
| 49  | 263.069                | 263.0707                 | 7             | [M-H] <sup>-</sup> | Methionyl-Aspartate                                          | C <sub>9</sub> H <sub>16</sub> N <sub>2</sub> O <sub>5</sub> S              | 47, 114, 202                                                      |
| 50  | 264.089                | 264.0877                 | 5             | [M-H] <sup>-</sup> | N-Phenylacetylglutamic acid                                  | C <sub>13</sub> H <sub>15</sub> NO <sub>5</sub>                             | 41, 91, 102,<br>128<br>221, 249                                   |
| 51  | 265.099                | 265.0983                 | 3             | [M-H] <sup>-</sup> | Miroprofen                                                   | C <sub>16</sub> H <sub>14</sub> N <sub>2</sub> O <sub>2</sub>               | 94, 142, 221,<br>265<br>17, 266                                   |
| 52  | 266.116                | 266.1146                 | 5             | [M-H] <sup>-</sup> | 4-amino-MX                                                   | C <sub>12</sub> H <sub>17</sub> N <sub>3</sub> O <sub>4</sub>               | 17, 46, 221,<br>266                                               |
| 53  | 267.119                | 267.1179                 | 4             | [M-H] <sup>-</sup> | 3-Methylcholanthrene                                         | C <sub>21</sub> H <sub>16</sub>                                             | 51, 251                                                           |
| 54  | 268.125                | -                        | -             | -                  | -                                                            | -                                                                           |                                                                   |
| 55  | 279.112                | -                        | -             | -                  | -                                                            | -                                                                           |                                                                   |
| 56  | 281.190                | 281.1911                 | 4             | [M-H] <sup>-</sup> | Vitamin A2 aldehyde                                          | C <sub>20</sub> H <sub>26</sub> O                                           | 65, 237                                                           |
| 57  | 283.208                | 283.2067                 | 5             | [M-H] <sup>-</sup> | Vitamin A2                                                   | C <sub>20</sub> H <sub>28</sub> O                                           | 43, 65, 133,<br>237                                               |
| 58  | 291.015                | -                        | -             | -                  | -                                                            | -                                                                           |                                                                   |
| 59  | 292.996                | -                        | -             | -                  | -                                                            | -                                                                           |                                                                   |
| 60  | 295.107                | 295.1088                 | 6             | [M-H] <sup>-</sup> | 10-Acetoxy-10,11-dihydro-5h-dibenz[b,f]azepine-5-carboxamide | C <sub>17</sub> H <sub>16</sub> N <sub>2</sub> O <sub>3</sub>               | 41, 208                                                           |
| 61  | 296.244                | -                        | -             | -                  | -                                                            | -                                                                           |                                                                   |
| 62  | 301.262                | -                        | -             | -                  | -                                                            | -                                                                           |                                                                   |
| 63  | 303.263                | -                        | -             | -                  | -                                                            | -                                                                           |                                                                   |
| 64  | 307.214                | 307.2140                 | 0             | [M-H] <sup>-</sup> | 2,2'-Azobis(4-methoxy-2,4-dimethylvaleronitrile)             | C <sub>16</sub> H <sub>28</sub> N <sub>4</sub> O <sub>2</sub>               | 71, 168, 219,<br>291                                              |

| No. | Measured<br><i>m/z</i> | Calculated<br><i>m/z</i> | Error<br> ppm | Assignment         |                               |                                                                              | Structurally<br>specific CID<br>ions ( <i>m/z</i> ) <sup>a)</sup> |
|-----|------------------------|--------------------------|---------------|--------------------|-------------------------------|------------------------------------------------------------------------------|-------------------------------------------------------------------|
|     |                        |                          |               | Ion form           | Compound                      | Molecular formula                                                            |                                                                   |
| 65  | 309.208                | 309.2071                 | 3             | [M-H] <sup>-</sup> | 12(13)Ep-9-KODE               | C <sub>18</sub> H <sub>30</sub> O <sub>4</sub>                               | 41, 59, 109,<br>193                                               |
| 66  | 311.189                | 311.1877                 | 4             | [M-H] <sup>-</sup> | Granisetron                   | C <sub>18</sub> H <sub>24</sub> N <sub>4</sub> O                             | 42, 104, 171,<br>295                                              |
| 67  | 321.189                | -                        | -             | -                  | -                             | -                                                                            |                                                                   |
| 68  | 323.210                | -                        | -             | -                  | -                             | -                                                                            | 59, 265                                                           |
| 69  | 325.236                | 325.2384                 | 7             | [M-H] <sup>-</sup> | Avocadyne 2-acetate           | C <sub>19</sub> H <sub>34</sub> O <sub>4</sub>                               | 41, 59, 265,<br>283                                               |
| 70  | 327.232                | 327.2330                 | 3             | [M-H] <sup>-</sup> | Docosahexaenoic acid          | C <sub>22</sub> H <sub>32</sub> O <sub>2</sub>                               | 59, 309, 327<br>45, 89, 197,<br>267, 309                          |
| 71  | 329.251                | 329.2486                 | 7             | [M-H] <sup>-</sup> | Docosapentaenoic acid (22n-3) | C <sub>22</sub> H <sub>34</sub> O <sub>2</sub>                               | 45, 59, 71, 131,<br>283                                           |
| 72  | 330.203                | -                        | -             | -                  | -                             | -                                                                            |                                                                   |
| 73  | 330.931                | -                        | -             | -                  | -                             | -                                                                            |                                                                   |
| 74  | 331.684                | -                        | -             | -                  | -                             | -                                                                            |                                                                   |
| 75  | 337.205                | 337.2020                 | 9             | [M-H] <sup>-</sup> | [6]-Gingerdiol 3-acetate      | C <sub>19</sub> H <sub>30</sub> O <sub>5</sub>                               | 41, 59, 195,<br>279                                               |
| 76  | 339.211                | 339.0278                 | 9             | [M-H] <sup>-</sup> | Ethylhydrocupreine            | C <sub>21</sub> H <sub>28</sub> N <sub>2</sub> O <sub>2</sub>                | 130, 293                                                          |
| 77  | 349.227                | 349.2285                 | 4             | [M-H] <sup>-</sup> | (+)-cis-3-Methylfentanyl      | C <sub>23</sub> H <sub>30</sub> N <sub>2</sub> O                             | 55, 148, 189,<br>293                                              |
| 78  | 351.215                | 351.2177                 | 8             | [M-H] <sup>-</sup> | prostaglandin                 | C <sub>20</sub> H <sub>32</sub> O <sub>5</sub>                               | 113, 139, 233,<br>279, 315                                        |
| 79  | 353.256                | -                        | -             | -                  | -                             | -                                                                            |                                                                   |
| 80  | 355.192                | 355.1915                 | 2             | [M-H] <sup>-</sup> | Piperochromanoic acid         | C <sub>22</sub> H <sub>28</sub> O <sub>4</sub>                               | 81, 131, 203,<br>295                                              |
| 81  | 369.169                | 369.1707                 | 5             | [M-H] <sup>-</sup> | Calanolide A                  | C <sub>22</sub> H <sub>26</sub> O <sub>5</sub>                               | 41, 133, 283,<br>351                                              |
| 82  | 371.187                | 371.1864                 | 2             | [M-H] <sup>-</sup> | Tanabalin                     | C <sub>22</sub> H <sub>28</sub> O <sub>5</sub>                               | 59, 285, 355                                                      |
| 83  | 375.164                | -                        | -             | -                  | -                             | -                                                                            |                                                                   |
| 84  | 383.174                | -                        | -             | -                  | -                             | -                                                                            |                                                                   |
| 85  | 385.192                | 385.1915                 | 1             | [M-H] <sup>-</sup> | Butyryl timolol               | C <sub>17</sub> H <sub>30</sub> N <sub>4</sub> O <sub>4</sub> S              | 74, 143, 257,<br>355                                              |
| 86  | 387.180                | 387.1813                 | 3             | [M-H] <sup>-</sup> | Cyclomammein                  | C <sub>22</sub> H <sub>28</sub> O <sub>6</sub>                               | 41, 67, 301                                                       |
| 87  | 391.215                | 391.2126                 | 6             | [M-H] <sup>-</sup> | Neuroprostane                 | C <sub>22</sub> H <sub>32</sub> O <sub>6</sub>                               | 95, 109, 219,<br>237                                              |
| 88  | 393.070                | 393.0668                 | 8             | [M-H] <sup>-</sup> | Diflufenican                  | C <sub>19</sub> H <sub>11</sub> F <sub>5</sub> N <sub>2</sub> O <sub>2</sub> | 49, 92, 128,<br>238                                               |
| 89  | 395.059                | -                        | -             | -                  | -                             | -                                                                            |                                                                   |

| No. | Measured<br><i>m/z</i> | Calculated<br><i>m/z</i> | Error<br> ppm | Assignment         |                       |                                                                 | Structurally<br>specific CID<br>ions ( <i>m/z</i> ) <sup>a)</sup> |
|-----|------------------------|--------------------------|---------------|--------------------|-----------------------|-----------------------------------------------------------------|-------------------------------------------------------------------|
|     |                        |                          |               | Ion form           | Compound              | Molecular formula                                               |                                                                   |
| 90  | 399.181                | 399.1813                 | 1             | [M-H] <sup>-</sup> | Melleolide            | C <sub>23</sub> H <sub>28</sub> O <sub>6</sub>                  | 81, 23, 205,<br>355                                               |
| 91  | 409.227                | 409.2232                 | 9             | [M-H] <sup>-</sup> | Forskolin             | C <sub>22</sub> H <sub>34</sub> O <sub>7</sub>                  | 59, 139, 243,<br>349                                              |
| 92  | 414.241                | -                        | -             | -                  | -                     | -                                                               |                                                                   |
| 93  | 417.193                | 417.1919                 | 3             | [M-H] <sup>-</sup> | Diosbulbin H          | C <sub>23</sub> H <sub>30</sub> O <sub>7</sub>                  | 67, 109, 265,<br>317, 401                                         |
| 94  | 419.240                | -                        | -             | -                  | -                     | -                                                               |                                                                   |
| 95  | 425.176                | 425.1718                 | 10            | [M-H] <sup>-</sup> | Mesprenone            | C <sub>25</sub> H <sub>30</sub> O <sub>4</sub> S                | 41, 74, 367,<br>425                                               |
| 96  | 428.247                | 428.2442                 | 6             | [M-H] <sup>-</sup> | Mebeverine            | C <sub>25</sub> H <sub>35</sub> NO <sub>5</sub>                 | 95, 181, 264,<br>382                                              |
| 97  | 429.229                | 429.2283                 | 2             | [M-H] <sup>-</sup> | Homofukinolide        | C <sub>25</sub> H <sub>34</sub> O <sub>6</sub>                  | 55, 99, 235,<br>317                                               |
| 98  | 431.218                | 431.2204                 | 6             | [M-H] <sup>-</sup> | LPA(18:3)             | C <sub>21</sub> H <sub>37</sub> O <sub>7</sub> P                |                                                                   |
| 99  | 435.239                | 435.2361                 | 7             | [M-H] <sup>-</sup> | DN-isobutylamide      | C <sub>20</sub> H <sub>32</sub> N <sub>6</sub> O <sub>5</sub>   | 42, 168, 250,<br>433                                              |
| 100 | 437.250                | -                        | -             | -                  | -                     | -                                                               |                                                                   |
| 101 | 442.258                | -                        | -             | -                  | -                     | -                                                               |                                                                   |
| 102 | 447.239                | -                        | -             | -                  | -                     | -                                                               |                                                                   |
| 103 | 452.260                | -                        | -             | -                  | -                     | -                                                               |                                                                   |
| 104 | 457.237                | 457.2674                 | 2             | [M-H] <sup>-</sup> | LPA (18:0)            | C <sub>21</sub> H <sub>43</sub> O <sub>7</sub> P                | 79, 153, 171,<br>283, 437                                         |
| 105 | 462.273                | 462.2762                 | 7             | [M-H] <sup>-</sup> | Bilastine             | C <sub>28</sub> H <sub>37</sub> N <sub>3</sub> O <sub>3</sub>   | 45, 157, 272,<br>390                                              |
| 106 | 463.221                | -                        | -             | -                  | -                     | -                                                               |                                                                   |
| 107 | 464.277                | 464.2783                 | 3             | [M-H] <sup>-</sup> | LPC (14:1)            | C <sub>22</sub> H <sub>44</sub> NO <sub>7</sub> P               | 210, 225, 486                                                     |
| 108 | 465.217                | 465.2130                 | 9             | [M-H] <sup>-</sup> | 8-Pentanoyleosolaniol | C <sub>24</sub> H <sub>34</sub> O <sub>9</sub>                  | 59, 157, 265,<br>447                                              |
| 109 | 467.352                | 467.3531                 | 2             | [M-H] <sup>-</sup> | Ambonic acid          | C <sub>31</sub> H <sub>48</sub> O <sub>3</sub>                  | 55, 73, 341,<br>451                                               |
| 110 | 470.272                | -                        | -             | -                  | -                     | -                                                               |                                                                   |
| 111 | 472.281                | -                        | -             | -                  | -                     | -                                                               |                                                                   |
| 112 | 474.234                | 474.2362                 | 5             | [M-H] <sup>-</sup> | Fluspirilene          | C <sub>29</sub> H <sub>31</sub> F <sub>2</sub> N <sub>3</sub> O | 42, 95, 173,<br>324, 415                                          |
| 113 | 475.213                | -                        | -             | -                  | -                     | -                                                               |                                                                   |
| 114 | 478.275                | -                        | -             | -                  | -                     | -                                                               |                                                                   |
| 115 | 480.280                | 480.2755                 | 9             | [M-H] <sup>-</sup> | Dihydrocytochalasin B | C <sub>29</sub> H <sub>39</sub> NO <sub>5</sub>                 | 42, 91, 317,<br>376, 462                                          |

| No. | Measured<br><i>m/z</i> | Calculated<br><i>m/z</i> | Error<br> ppm | Assignment         |                                         |                                                                              | Structurally<br>specific CID<br>ions ( <i>m/z</i> ) <sup>a)</sup> |
|-----|------------------------|--------------------------|---------------|--------------------|-----------------------------------------|------------------------------------------------------------------------------|-------------------------------------------------------------------|
|     |                        |                          |               | Ion form           | Compound                                | Molecular formula                                                            |                                                                   |
| 116 | 481.208                | 481.2079                 | 0             | [M-H] <sup>-</sup> | 3'-Hydroxy-T2 Toxin                     | C <sub>24</sub> H <sub>34</sub> O <sub>10</sub>                              | 41, 183, 321,<br>381, 463                                         |
| 117 | 483.228                | 483.2308                 | 6             | [M-H] <sup>-</sup> | Kanamycin                               | C <sub>18</sub> H <sub>36</sub> N <sub>4</sub> O <sub>11</sub>               | 59, 159, 233,<br>322, 380                                         |
| 118 | 490.269                | 490.2675                 | 3             | [M-H] <sup>-</sup> | Lidoflazine                             | -                                                                            |                                                                   |
| 119 | 498.282                | 498.2861                 | 8             | [M-H] <sup>-</sup> | Beloranib                               | C <sub>29</sub> H <sub>41</sub> NO <sub>6</sub>                              | 119, 163, 303,<br>411                                             |
| 120 | 500.267                | -                        | -             | -                  | -                                       | -                                                                            |                                                                   |
| 121 | 502.248                | 502.2519                 | 8             | [M-H] <sup>-</sup> | Lysyl-aspartyl-glutamyl-leucine         | C <sub>21</sub> H <sub>37</sub> N <sub>5</sub> O <sub>9</sub>                | 42, 144, 259,<br>328, 412                                         |
| 122 | 504.234                | -                        | -             | -                  | -                                       | -                                                                            |                                                                   |
| 123 | 506.262                | 506.2582                 | 8             | [M-H] <sup>-</sup> | Epithilone B                            | C <sub>27</sub> H <sub>41</sub> NO <sub>6</sub> S                            | 40, 74, 138,<br>472, 486                                          |
| 124 | 507.211                | 507.2083                 | 5             | [M-H] <sup>-</sup> | 6-O-Oleuropeoylsucrose                  | C <sub>22</sub> H <sub>36</sub> O <sub>13</sub>                              | 43, 147, 299,<br>327, 475                                         |
| 125 | 514.265                | -                        | -             | -                  | -                                       | -                                                                            |                                                                   |
| 126 | 518.285                | -                        | -             | -                  | -                                       | -                                                                            |                                                                   |
| 127 | 524.274                | 524.2731                 | 2             | [M-H] <sup>-</sup> | Isodesmosine                            | C <sub>24</sub> H <sub>40</sub> N <sub>5</sub> O <sub>8</sub>                | 45, 132, 490                                                      |
| 128 | 533.291                | 533.2885                 | 5             | [M-H] <sup>-</sup> | LPG (20:3)                              | C <sub>26</sub> H <sub>47</sub> O <sub>9</sub> P                             | 97, 153, 227,<br>245, 305, 533                                    |
| 129 | 535.214                | 535.2185                 | 8             | [M-H] <sup>-</sup> | Quassimarín                             | C <sub>27</sub> H <sub>36</sub> O <sub>11</sub>                              | 59, 115, 287,<br>363, 447                                         |
| 130 | 537.218                | -                        | -             | -                  | -                                       | -                                                                            |                                                                   |
| 131 | 546.312                | -                        | -             | -                  | -                                       | -                                                                            |                                                                   |
| 132 | 548.334                | -                        | -             | -                  | -                                       | -                                                                            |                                                                   |
| 133 | 552.273                | 552.2715                 | 3             | [M-H] <sup>-</sup> | Vignatic acid A                         | C <sub>30</sub> H <sub>39</sub> N <sub>3</sub> O <sub>7</sub>                | 57, 85, 331,<br>392, 438                                          |
| 134 | 553.182                | -                        | -             | -                  | -                                       | -                                                                            |                                                                   |
| 135 | 568.218                | 568.2188                 | 1             | [M-H] <sup>-</sup> | Aklavin                                 | C <sub>30</sub> H <sub>35</sub> NO <sub>10</sub>                             | 59, 129, 281,<br>377, 411, 568                                    |
| 136 | 574.320                | -                        | -             | -                  | -                                       | -                                                                            |                                                                   |
| 137 | 576.347                | -                        | -             | -                  | -                                       | -                                                                            |                                                                   |
| 138 | 582.268                | 582.2722                 | 7             | [M-H] <sup>-</sup> | Dihydroegotamine                        | C <sub>33</sub> H <sub>37</sub> N <sub>5</sub> O <sub>5</sub>                | 42, 103, 209,<br>358, 450, 580                                    |
| 139 | 587.353                | 587.3589                 | 10            | [M-H] <sup>-</sup> | 25-Hydroxyvitamin D2-25-<br>glucuronide | C <sub>34</sub> H <sub>52</sub> O <sub>8</sub>                               | 59, 131, 311,<br>411, 481                                         |
| 140 | 589.357                | 589.3615                 | 8             | [M-H] <sup>-</sup> | Benextramine                            | C <sub>32</sub> H <sub>54</sub> N <sub>4</sub> O <sub>2</sub> S <sub>2</sub> | 59, 120, 248,<br>347, 453                                         |
| 141 | 590.276                | -                        | -             | -                  | -                                       | -                                                                            |                                                                   |
| 142 | 595.201                | -                        | -             | -                  | -                                       | -                                                                            |                                                                   |

| No. | Measured<br><i>m/z</i> | Calculated<br><i>m/z</i> | Error<br> ppm | Assignment         |                                          |                                                    | Structurally<br>specific CID<br>ions ( <i>m/z</i> ) <sup>a)</sup> |
|-----|------------------------|--------------------------|---------------|--------------------|------------------------------------------|----------------------------------------------------|-------------------------------------------------------------------|
|     |                        |                          |               | Ion form           | Compound                                 | Molecular formula                                  |                                                                   |
| 143 | 603.367                | 603.3667                 | 0             | [M-H] <sup>-</sup> | PA(28:2)                                 | C <sub>31</sub> H <sub>57</sub> O <sub>9</sub> P   | 79, 171, 295,<br>325, 431, 449                                    |
| 144 | 605.384                | -                        | -             | -                  | -                                        | -                                                  |                                                                   |
| 145 | 613.353                | -                        | -             | -                  | -                                        | -                                                  |                                                                   |
| 146 | 615.389                | 615.3902                 | 2             | [M-H] <sup>-</sup> | 13-O-Tetradecanoylphorbol 12-<br>acetate | C <sub>36</sub> H <sub>56</sub> O <sub>8</sub>     | 59, 127, 209,<br>405, 547, 615                                    |
| 147 | 617.403                | -                        | -             | -                  | -                                        | -                                                  |                                                                   |
| 148 | 619.417                | 619.4215                 | 7             | [M-H] <sup>-</sup> | Glucoside Rh4                            | C <sub>36</sub> H <sub>60</sub> O <sub>8</sub>     | 59, 499, 603<br>79, 97, 153,                                      |
| 149 | 622.371                | 622.3726                 | 3             | [M-H] <sup>-</sup> | PS(24:0)                                 | C <sub>30</sub> H <sub>58</sub> NO <sub>10</sub> P | 199, 353, 535,<br>622                                             |
| 150 | 643.403                | -                        | -             | -                  | -                                        | -                                                  |                                                                   |
| 151 | 645.425                | -                        | -             | -                  | -                                        | -                                                  |                                                                   |
| 152 | 647.435                | -                        | -             | -                  | -                                        | -                                                  |                                                                   |
| 153 | 649.429                | -                        | -             | -                  | -                                        | -                                                  |                                                                   |
| 154 | 651.443                | 651.4395                 | 5             | [M-H] <sup>-</sup> | PA (O-34:5)                              | C <sub>37</sub> H <sub>65</sub> O <sub>7</sub> P   | 79, 97, 171,<br>275, 393                                          |
| 155 | 659.492                | -                        | -             | -                  | -                                        | -                                                  |                                                                   |
| 156 | 671.459                | 671.4657                 | 10            | [M-H] <sup>-</sup> | PA(34:2)                                 | C <sub>37</sub> H <sub>69</sub> O <sub>8</sub> P   | 79, 97, 209,<br>307, 671                                          |
| 157 | 673.483                | 673.4814                 | 2             | [M-H] <sup>-</sup> | PA(34:1)                                 | C <sub>37</sub> H <sub>71</sub> O <sub>8</sub> P   | 79, 237, 255,<br>279, 673                                         |
| 158 | 693.447                | 693.4501                 | 4             | [M-H] <sup>-</sup> | PA(36:5)                                 | C <sub>39</sub> H <sub>67</sub> O <sub>8</sub> P   | 97, 283, 313<br>581, 651                                          |
| 159 | 698.507                | 698.5130                 | 9             | [M-H] <sup>-</sup> | PE(P-34:2)                               | C <sub>39</sub> H <sub>74</sub> NO <sub>7</sub> P  | 79, 93, 140,<br>253, 389, 417                                     |
| 160 | 699.509                | -                        | -             | -                  | -                                        | -                                                  |                                                                   |
| 161 | 700.529                | 700.5287                 | 0             | [M-H] <sup>-</sup> | PE(P-34:1)                               | C <sub>39</sub> H <sub>76</sub> NO <sub>7</sub> P  | 79, 93, 255,<br>391, 545                                          |
| 162 | 701.489                | -                        | -             | -                  | -                                        | -                                                  |                                                                   |
| 163 | 702.533                | -                        | -             | -                  | -                                        | -                                                  |                                                                   |
| 164 | 714.503                | 714.5079                 | 7             | [M-H] <sup>-</sup> | PE(34:2)                                 | C <sub>39</sub> H <sub>74</sub> NO <sub>8</sub> P  | 153, 227, 406,<br>504                                             |
| 165 | 716.517                | 716.5236                 | 9             | [M-H] <sup>-</sup> | PE(34:1)                                 | C <sub>39</sub> H <sub>76</sub> NO <sub>8</sub> P  | 153, 255, 434,<br>478, 717                                        |
| 166 | 719.471                | 719.4657                 | 7             | [M-H] <sup>-</sup> | PA(38:6)                                 | C <sub>41</sub> H <sub>69</sub> O <sub>8</sub> P   | 79, 153, 255,<br>409, 719                                         |
| 167 | 721.476                | 721.4814                 | 7             | [M-H] <sup>-</sup> | PA(38:5)                                 | C <sub>41</sub> H <sub>71</sub> O <sub>8</sub> P   | 79, 153, 255,<br>391, 721                                         |
| 168 | 726.549                | 726.5443                 | 6             | [M-H] <sup>-</sup> | PE(P-36:2)                               | C <sub>41</sub> H <sub>78</sub> NO <sub>7</sub> P  | 79, 571                                                           |

| No. | Measured<br><i>m/z</i> | Calculated<br><i>m/z</i> | Error<br> ppm | Assignment         |             |                                                   | Structurally<br>specific CID<br>ions ( <i>m/z</i> ) <sup>a)</sup> |
|-----|------------------------|--------------------------|---------------|--------------------|-------------|---------------------------------------------------|-------------------------------------------------------------------|
|     |                        |                          |               | Ion form           | Compound    | Molecular formula                                 |                                                                   |
| 169 | 728.565                | 728.5600                 | 0             | [M-H] <sup>-</sup> | PE(P-36:1)  | C <sub>41</sub> H <sub>80</sub> NO <sub>7</sub> P | 79, 265, 729<br>79, 140, 265,<br>283, 419, 729<br>79, 93, 159,    |
| 170 | 731.517                | 731.5233                 | 9             | [M-H] <sup>-</sup> | PG (O-34:2) | C <sub>40</sub> H <sub>77</sub> O <sub>9</sub> P  | 209, 377, 469,<br>657                                             |
| 171 | 736.488                | 736.4923                 | 6             | [M-H] <sup>-</sup> | PE(P-36:5)  | C <sub>41</sub> H <sub>72</sub> NO <sub>8</sub> P | 63,79, 239,<br>445, 573                                           |
| 172 | 738.495                | -                        | -             | -                  | -           | -                                                 |                                                                   |
| 173 | 742.534                | 742.5392                 | 7             | [M-H] <sup>-</sup> | PE(36:2)    | C <sub>41</sub> H <sub>78</sub> NO <sub>8</sub> P | 196, 281, 460,<br>478, 743                                        |
| 174 | 744.551                | 744.5549                 | 0             | [M-H] <sup>-</sup> | PE(36:1)    | C <sub>41</sub> H <sub>80</sub> NO <sub>8</sub> P | 153, 339, 536                                                     |
| 175 | 745.482                | 745.4814                 | 1             | [M-H] <sup>-</sup> | PA(40:7)    | C <sub>43</sub> H <sub>71</sub> O <sub>8</sub> P  | 153, 281, 327,<br>435, 481, 745                                   |
| 176 | 746.535                | 746.5342                 | 1             | [M-H] <sup>-</sup> | PS (O-34:1) | C <sub>40</sub> H <sub>78</sub> NO <sub>9</sub> P | 79, 97, 153,<br>281, 395, 660                                     |
| 177 | 747.526                | -                        | -             | -                  | -           | -                                                 |                                                                   |
| 178 | 748.545                | 748.5498                 | 6             | [M-H] <sup>-</sup> | PS (O-34:0) | C <sub>40</sub> H <sub>80</sub> NO <sub>9</sub> P | 79, 283, 662                                                      |
| 179 | 750.511                | 750.5079                 | 4             | [M-H] <sup>-</sup> | PC(34:5)    | C <sub>42</sub> H <sub>74</sub> NO <sub>8</sub> P | 59, 127, 227,<br>301, 453, 647                                    |
| 180 | 758.523                | -                        | -             | -                  | -           | -                                                 | 275, 307, 763                                                     |
| 181 | 762.513                | 762.5079                 | 7             | [M-H] <sup>-</sup> | PE(38:6)    | C <sub>43</sub> H <sub>74</sub> NO <sub>8</sub> P | 153, 275, 307,<br>486, 763                                        |
| 182 | 764.540                | -                        | -             | -                  | -           | -                                                 | 259, 283, 303,                                                    |
| 183 | 766.542                | 766.5392                 | 0             | [M-H] <sup>-</sup> | PE(38:4)    | C <sub>43</sub> H <sub>78</sub> NO <sub>8</sub> P | 462, 480, 482,<br>500, 767                                        |
| 184 | 770.548                | -                        | -             | -                  | -           | -                                                 | 79, 93, 157,                                                      |
| 185 | 772.555                | 772.5498                 | 7             | [M-H] <sup>-</sup> | PS (O-36:2) | C <sub>42</sub> H <sub>80</sub> NO <sub>9</sub> P | 377, 395, 686,<br>773                                             |
| 186 | 773.547                | -                        | -             | -                  | -           | -                                                 |                                                                   |
| 187 | 774.551                | 774.5443                 | 9             | [M-H] <sup>-</sup> | PE(P-40:6)  | C <sub>45</sub> H <sub>78</sub> NO <sub>7</sub> P | 83, 122, 265,<br>329, 465, 620<br>79, 281, 417,<br>702            |
| 188 | 775.543                | 775.5495                 | 8             | [M-H] <sup>-</sup> | PG(36:1)    | C <sub>42</sub> H <sub>81</sub> O <sub>10</sub> P | 79, 281, 433,<br>590, 684, 758                                    |

| No. | Measured<br><i>m/z</i> | Calculated<br><i>m/z</i> | Error<br> ppm | Assignment         |               |                                                    | Structurally<br>specific CID<br>ions ( <i>m/z</i> ) <sup>a)</sup> |
|-----|------------------------|--------------------------|---------------|--------------------|---------------|----------------------------------------------------|-------------------------------------------------------------------|
|     |                        |                          |               | Ion form           | Compound      | Molecular formula                                  |                                                                   |
| 189 | 776.526                | 776.5236                 | 3             | [M-H] <sup>-</sup> | PC(36:6)      | C <sub>42</sub> H <sub>76</sub> NO <sub>8</sub> P  | 79, 183, 227,<br>327, 581, 673                                    |
| 190 | 778.563                | -                        | -             | -                  | -             | -                                                  |                                                                   |
| 191 | 786.487                | 786.4927                 | 7             | [M-H] <sup>-</sup> | PC(34:5)      | C <sub>42</sub> H <sub>74</sub> NO <sub>8</sub> P  | 59, 227, 301,<br>453                                              |
| 192 | 788.528                | 788.5236                 | 6             | [M-H] <sup>-</sup> | PE (40:7)     | C <sub>45</sub> H <sub>76</sub> NO <sub>8</sub> P  | 79, 97, 153,<br>283, 327, 478,<br>524                             |
| 193 | 790.558                | 790.5604                 | 0             | [M-H] <sup>-</sup> | PS(36:0)      | C <sub>42</sub> H <sub>82</sub> NO <sub>10</sub> P | 79, 686                                                           |
| 194 | 792.552                | 792.5549                 | 4             | [M-H] <sup>-</sup> | PE(40:5)      | C <sub>45</sub> H <sub>80</sub> NO <sub>8</sub> P  | 153, 283, 329,<br>462, 480, 508,<br>526                           |
| 195 | 804.543                | 804.5479                 | 6             | [M-H] <sup>-</sup> | LacCer(d30:1) | C <sub>42</sub> H <sub>79</sub> NO <sub>13</sub>   | 59, 137, 224,<br>402, 762, 745                                    |
| 196 | 807.545                | -                        | -             | -                  | -             | -                                                  |                                                                   |
| 197 | 808.543                | 808.5498                 | 8             | [M-H] <sup>-</sup> | PE (40:5-OH)  | C <sub>45</sub> H <sub>80</sub> NO <sub>9</sub> P  | 153, 196, 309,<br>488, 516, 809                                   |
| 198 | 809.562                | 809.5702                 | 10            | [M-H] <sup>-</sup> | PG (O-40:5)   | C <sub>46</sub> H <sub>83</sub> O <sub>9</sub> P   | 79, 153, 209,<br>301, 433, 451,<br>525, 736                       |
| 199 | 810.533                | 810.5291                 | 5             | [M-H] <sup>-</sup> | PS(38:4)      | C <sub>44</sub> H <sub>78</sub> NO <sub>10</sub> P | 153, 279, 415,<br>723, 811                                        |
| 200 | 814.517                | -                        | -             | -                  | -             | -                                                  |                                                                   |
| 201 | 816.565                | -                        | -             | -                  | -             | -                                                  |                                                                   |
| 202 | 818.579                | 818.5705                 | 10            | [M-H] <sup>-</sup> | PE (42:6)     | C <sub>47</sub> H <sub>82</sub> NO <sub>8</sub> P  | 97, 122, 283,<br>327, 506, 819                                    |
| 203 | 821.542                | 821.5338                 | 10            | [M-H] <sup>-</sup> | PG (40:6)     | C <sub>46</sub> H <sub>79</sub> O <sub>10</sub> P  | 79, 153, 245,<br>327, 437, 493,<br>555, 747                       |
| 204 | 822.558                | 822.5655                 | 9             | [M-H] <sup>-</sup> | PS (O-40:5)   | C <sub>46</sub> H <sub>82</sub> NO <sub>9</sub> P  | 79, 97, 153,<br>257, 301, 451,<br>736, 823                        |
| 205 | 828.533                | 828.5396                 | 8             | [M-H] <sup>-</sup> | PS (38:3-OH)  | C <sub>44</sub> H <sub>80</sub> NO <sub>11</sub> P | 153, 293, 311,<br>447, 742, 829                                   |
| 206 | 832.544                | 832.5498                 | 7             | [M-H] <sup>-</sup> | PE (42:7-OH)  | C <sub>47</sub> H <sub>80</sub> NO <sub>9</sub> P  | 153, 196, 331,<br>500, 528, 833                                   |
| 207 | 833.561                | 833.5549                 | 7             | [M-H] <sup>-</sup> | PE (38:2-2OH) | C <sub>44</sub> H <sub>83</sub> O <sub>12</sub> P  | 153, 171, 313,<br>445, 519, 541                                   |
| 208 | 834.550                | -                        | -             | -                  | -             | -                                                  |                                                                   |
| 209 | 835.585                | -                        | -             | -                  | -             | -                                                  |                                                                   |

| No. | Measured<br><i>m/z</i> | Calculated<br><i>m/z</i> | Error<br> ppm | Assignment         |                  |                                                                | Structurally<br>specific CID<br>ions ( <i>m/z</i> ) <sup>a)</sup> |
|-----|------------------------|--------------------------|---------------|--------------------|------------------|----------------------------------------------------------------|-------------------------------------------------------------------|
|     |                        |                          |               | Ion form           | Compound         | Molecular formula                                              |                                                                   |
| 210 | 836.538                | 836.5447                 | 8             | [M-H] <sup>-</sup> | PS (40:5)        | C <sub>46</sub> H <sub>80</sub> NO <sub>10</sub> P             | 79, 97, 153,<br>287, 331, 767,<br>750                             |
| 211 | 846.501                | 846.4927                 | 10            | [M-H] <sup>-</sup> | PS (40:8-OH)     | C <sub>46</sub> H <sub>74</sub> NO <sub>11</sub> P             | 153, 303, 439,<br>473, 759, 846                                   |
| 212 | 848.543                | 848.5447                 | 2             | [M-H] <sup>-</sup> | PE (42:7-2OH)    | C <sub>47</sub> H <sub>80</sub> NO <sub>10</sub> P             | 153, 196, 337,<br>510, 534, 849                                   |
| 213 | 856.553                | -                        | -             | -                  | -                | -                                                              | 153, 303, 337,                                                    |
| 214 | 857.562                | 857.5549                 | 8             | [M-H] <sup>-</sup> | PG (42:4-2OH)    | C <sub>46</sub> H <sub>83</sub> O <sub>12</sub> P              | 473, 519, 565,<br>858                                             |
| 215 | 860.641                | 860.6386                 | 3             | [M-H] <sup>-</sup> | PE (42:1-2OH)    | C <sub>47</sub> H <sub>92</sub> NO <sub>10</sub> P             | 153, 492, 861                                                     |
| 216 | 862.603                | 862.5967                 | 7             | [M-H] <sup>-</sup> | PE (44:6-OH)     | C <sub>49</sub> H <sub>86</sub> NO <sub>9</sub> P              | 153, 196, 343,<br>518, 540, 863                                   |
| 217 | 863.637                | -                        | -             | -                  | -                | -                                                              | 153, 196, 337,                                                    |
| 218 | 876.570                | 876.5760                 | 7             | [M-H] <sup>-</sup> | PE (44:7-2OH)    | C <sub>49</sub> H <sub>84</sub> NO <sub>10</sub> P             | 516, 556                                                          |
| 219 | 878.486                | 878.4825                 | 4             | [M-H] <sup>-</sup> | PE (40:8-3OH)    | C <sub>46</sub> H <sub>74</sub> NO <sub>13</sub> P             | 153, 305, 349,<br>441, 485, 791,<br>878                           |
| 220 | 881.543                | -                        | -             | -                  | -                | -                                                              | 43, 179, 323,                                                     |
| 221 | 883.569                | -                        | -             | -                  | -                | -                                                              | 414, 576, 810,<br>868                                             |
| 222 | 885.587                | -                        | -             | -                  | -                | -                                                              | 79, 179, 241,                                                     |
| 223 | 888.679                | -                        | -             | -                  | -                | -                                                              | 327, 479, 639,<br>729                                             |
| 224 | 894.519                | -                        | -             | -                  | -                | -                                                              | 293, 429, 483,<br>645, 663, 940                                   |
| 225 | 900.502                | 900.4962                 | 6             | [M-H] <sup>-</sup> | beta1-Tomatidine | C <sub>45</sub> H <sub>75</sub> NO <sub>17</sub>               | 79, 137, 285,<br>395, 467, 719,<br>979                            |
| 226 | 904.664                | -                        | -             | -                  | -                | -                                                              | 79, 137, 285,                                                     |
| 227 | 909.556                | 909.5499                 | 7             | [M-H] <sup>-</sup> | PI(40:6)         | C <sub>49</sub> H <sub>83</sub> O <sub>13</sub> P              | 395, 467, 719,<br>979                                             |
| 228 | 939.564                | 939.5604                 | 4             | [M-H] <sup>-</sup> | PG (40:6-OH)     | C <sub>50</sub> H <sub>85</sub> O <sub>14</sub> P              | 79, 137, 285,                                                     |
| 229 | 1023.555               | -                        | -             | -                  | -                | -                                                              | 395, 467, 719,<br>979                                             |
| 230 | 1069.512               | 1069.5060                | 6             | [M-H] <sup>-</sup> | PG (44:10-2OH)   | C <sub>53</sub> H <sub>84</sub> O <sub>18</sub> P <sub>2</sub> | 79, 137, 285,                                                     |
| 231 | 1071.506               | -                        | -             | -                  | -                | -                                                              | 395, 467, 719,<br>979                                             |
| 232 | 1084.501               | -                        | -             | -                  | -                | -                                                              |                                                                   |



| No. | Measured<br><i>m/z</i> | Calculated<br><i>m/z</i> | Error<br> ppm | Assignment         |                                          |                                                                                 | Structurally<br>specific CID<br>ions ( <i>m/z</i> ) <sup>a)</sup> |
|-----|------------------------|--------------------------|---------------|--------------------|------------------------------------------|---------------------------------------------------------------------------------|-------------------------------------------------------------------|
|     |                        |                          |               | Ion form           | Compound                                 | Molecular formula                                                               |                                                                   |
| 233 | 1086.489               | 1086.4863                | 3             | [M-H] <sup>-</sup> | CDP-DG(42:11-O)                          | C <sub>54</sub> H <sub>79</sub> N <sub>3</sub> O <sub>16</sub> P <sub>2</sub>   | 59, 159, 384,<br>442, 558, 768,<br>843, 1028                      |
| 234 | 1097.464               | -                        | -             | -                  | -                                        | -                                                                               |                                                                   |
| 235 | 1110.552               | 1110.5438                | 7             | [M-H] <sup>-</sup> | CDP-DG(42:7-2OH)                         | C <sub>54</sub> H <sub>87</sub> N <sub>3</sub> O <sub>17</sub> P <sub>2</sub>   | 71, 159, 291,<br>384, 559, 720,<br>851, 1093                      |
| 236 | 1112.437               | 1112.4315                | 5             | [M-H] <sup>-</sup> | (13Z,16Z)-Tetracos-13,16-dienoyl-<br>CoA | C <sub>45</sub> H <sub>78</sub> N <sub>7</sub> O <sub>17</sub> P <sub>3</sub> S | 79, 328, 344,<br>408, 488,<br>635, 716, 776                       |
| 237 | 1114.451               | 1114.4472                | 3             | [M-H] <sup>-</sup> | Nervonyl CoA                             | C <sub>45</sub> H <sub>80</sub> N <sub>7</sub> O <sub>17</sub> P <sub>3</sub> S | 79, 143, 159,<br>344, 424, 488,<br>716                            |
| 238 | 1116.463               | 1116.4628                | 0             | [M-H] <sup>-</sup> | Methyltricosanoyl-CoA                    | C <sub>45</sub> H <sub>82</sub> N <sub>7</sub> O <sub>17</sub> P <sub>3</sub> S | 79, 143, 159,<br>408, 488, 635,<br>716, 776                       |
| 239 | 1140.398               | 1140.3900                | 7             | [M-H] <sup>-</sup> | Deoxycholoyl-CoA                         | C <sub>45</sub> H <sub>74</sub> N <sub>7</sub> O <sub>19</sub> P <sub>3</sub> S | 79, 159, 179,<br>373, 488, 713,<br>793, 1122                      |
| 240 | 1156.394               | 1156.3849                | 8             | [M-H] <sup>-</sup> | Choloyl-CoA                              | C <sub>45</sub> H <sub>74</sub> N <sub>7</sub> O <sub>20</sub> P <sub>3</sub> S | 79, 134, 159,<br>389, 488, 729,<br>1138                           |
| 241 | 1158.388               | -                        | -             | -                  | -                                        | -                                                                               |                                                                   |
| 242 | 1182.388               | -                        | -             | -                  | -                                        | -                                                                               |                                                                   |
| 243 | 1184.443               | -                        | -             | -                  | -                                        | -                                                                               |                                                                   |
| 244 | 1218.291               | -                        | -             | -                  | -                                        | -                                                                               |                                                                   |
| 245 | 1424.803               | -                        | -             | -                  | -                                        | -                                                                               |                                                                   |
| 246 | 1470.548               | -                        | -             | -                  | -                                        | -                                                                               |                                                                   |
| 247 | 1494.456               | -                        | -             | -                  | -                                        | -                                                                               |                                                                   |
| 248 | 1495.973               | 1495.9650                | 5             | [M-H] <sup>-</sup> | CL(76:12)                                | C <sub>85</sub> H <sub>142</sub> O <sub>17</sub> P <sub>2</sub>                 | 253, 329, 389,<br>465, 591, 747                                   |
| 249 | 1499.492               | -                        | -             | -                  | -                                        | -                                                                               |                                                                   |
| 250 | 1516.134               | 1516.1215                | 8             | [M-H] <sup>-</sup> | CL(76:2)                                 | C <sub>85</sub> H <sub>162</sub> O <sub>17</sub> P <sub>2</sub>                 | 255, 297, 353,<br>489, 638, 758                                   |
| 251 | 1541.962               | 1541.9493                | 8             | [M-H] <sup>-</sup> | CL(80:17)                                | C <sub>89</sub> H <sub>140</sub> O <sub>17</sub> P <sub>2</sub>                 | 253, 327, 463,<br>615, 770                                        |
| 252 | 1567.963               | 1567.9650                | 1             | [M-H] <sup>-</sup> | CL(82:18)                                | C <sub>91</sub> H <sub>142</sub> O <sub>17</sub> P <sub>2</sub>                 | 255, 327, 463,<br>628, 783                                        |
| 253 | 1587.895               | -                        | -             | -                  | -                                        | -                                                                               |                                                                   |

a) Structurally specific CID ions of extracted compounds were detected by LC-MS/MS and/or MALD-TOF/TOF MS/MS using CID.

Red fragment ions were detected by LC-MS/MS, and blue fragment ions were detected by MALD-TOF/TOF MS/MS.

## Reference

1. K. A. Nelson, G. J. Daniels, J. W. Fournie and M. J. Hemmer, *J Biomol Tech*, 2013, **24**, 119-127.
2. A. Dannhorn, E. Kazanc, S. Ling, C. Nikula, E. Karali, M. P. Serra, J. L. Vorng, P. Inglese, G. Maglennon, G. Hamm, J. Swales, N. Strittmatter, S. T. Barry, O. J. Sansom, G. Poulgiannis, J. Bunch, R. J. Goodwin and Z. Takats, *Anal. Chem.*, 2020, **92**, 11080-11088.
3. X. Wang, J. Han, J. Yang, J. Pan and C. H. Borchers, *Chem Sci*, 2015, **6**, 729-738.
4. K.-H. Nam, D. Y. Kim, H. J. Kim, I.-S. Pack, H. J. Kim, Y. S. Chung, S. Y. Kim and C.-G. Kim, *Applied Biological Chemistry*, 2019, **62**, 15.
5. A. Ly, A. Buck, B. Balluff, N. Sun, K. Gorzolka, A. Feuchtinger, K.-P. Janssen, P. J. K. Kuppen, C. J. H. van de Velde, G. Weirich, F. Erlmeier, R. Langer, M. Aubele, H. Zitzelsberger, L. McDonnell, M. Aichler and A. Walch, *Nat. Protoc.*, 2016, **11**, 1428-1443.
